# Supplementary material for: Reconstructing the demographic history of divergence between European river and brook lampreys using approximate Bayesian computations
Source: PubMed Central journal article supplement (PMC4830234; doi:10.7717/peerj.1910), 2016-04-07

Table S1: **Pairwise  $F_{ST}$  values**. Non-significant values are in italic and grey-colored.

|         | LF Aa        | LF Hem       | LF Beth      | LF Bre       | LF Ris       | LF Oir       | LP Aa | LP Hem | LP Bet | LP Bre | LP Ris |
|---------|--------------|--------------|--------------|--------------|--------------|--------------|-------|--------|--------|--------|--------|
| LF Hem  | <i>0.000</i> |              |              |              |              |              |       |        |        |        |        |
| LF Beth | <i>0.002</i> | <i>0.001</i> |              |              |              |              |       |        |        |        |        |
| LF Bre  | <i>0.000</i> | <i>0.000</i> | <i>0.003</i> |              |              |              |       |        |        |        |        |
| LF Ris  | <i>0.000</i> | <i>0.000</i> | <i>0.001</i> | <i>0.003</i> |              |              |       |        |        |        |        |
| LF Oir  | <i>0.000</i> | <i>0.003</i> | <i>0.011</i> | <i>0.006</i> | <i>0.003</i> |              |       |        |        |        |        |
| LP Aa   | 0.084        | 0.090        | 0.079        | 0.090        | 0.088        | 0.090        |       |        |        |        |        |
| LP Hem  | 0.079        | 0.077        | 0.088        | 0.083        | 0.071        | 0.066        | 0.102 |        |        |        |        |
| LP Bet  | <i>0.022</i> | <i>0.025</i> | <i>0.028</i> | 0.027        | 0.032        | <i>0.020</i> | 0.115 | 0.090  |        |        |        |
| LP Bre  | 0.099        | 0.116        | 0.135        | 0.091        | 0.102        | 0.087        | 0.192 | 0.189  | 0.088  |        |        |
| LP Ris  | 0.033        | 0.035        | 0.050        | 0.034        | 0.033        | 0.030        | 0.121 | 0.103  | 0.055  | 0.097  |        |
| LP Oir  | 0.040        | 0.048        | 0.044        | 0.044        | 0.046        | 0.028        | 0.075 | 0.087  | 0.040  | 0.087  | 0.063  |

Table S2: **Confidence measure in model selection** inferred from 1000 pseudo observed dataset

| River      | Focal scenario | Type II error |       |       |       |        |       |
|------------|----------------|---------------|-------|-------|-------|--------|-------|
|            |                | Type I error  | SI    | IM    | AM    | SC     | PAN   |
| <b>AA</b>  | I              | 0.435         | -     | 0.071 | 0.478 | 0.077  | 0.194 |
|            | IM             | 0.404         | 0.048 | -     | 0.078 | 0.685  | 0.427 |
|            | AM             | 0.522         | 0.352 | 0.071 | -     | 0.049  | 0     |
|            | SC             | 0.811         | 0.035 | 0.071 | 0.051 | -      | 0.049 |
|            | PAN            | 1             | 0     | 0.071 | 0     | 0      | -     |
| <b>BET</b> | I              | 0.989         | -     | 0.007 | 0.012 | 0.005  | 0     |
|            | IM             | 0.326         | 0.027 | -     | 0.049 | 0.763  | 0.975 |
|            | AM             | 0.988         | 0.573 | 0.007 | -     | 0.106  | 0     |
|            | SC             | 0.897         | 0.387 | 0.007 | 0.298 | -      | 0.106 |
|            | PAN            | 0.975         | 0.002 | 0.007 | 0     | 0.023  | -     |
| <b>BRE</b> | I              | 0.73          | -     | 0.098 | 0.109 | 0.087  | 0     |
|            | IM             | 0.698         | 0.086 | -     | 0.186 | 0.253  | 0.015 |
|            | AM             | 0.891         | 0.107 | 0.098 | -     | 0.058  | 0     |
|            | SC             | 0.4           | 0.537 | 0.098 | 0.614 | -      | 0.058 |
|            | PAN            | 0.741         | 0     | 0.098 | 0     | 0.002  | -     |
| <b>HEM</b> | I              | 0.632         | -     | 0.107 | 0.17  | 0.076  | 0     |
|            | IM             | 0.744         | 0.151 | -     | 0.354 | 0.337  | 0.941 |
|            | AM             | 0.83          | 0.37  | 0.107 | -     | 0.051  | 0     |
|            | SC             | 0.464         | 0.111 | 0.107 | 0.294 | -      | 0.051 |
|            | PAN            | 1             | 0     | 0.107 | 0     | 0      | -     |
| <b>OIR</b> | I              | 0.885         | -     | 0.02  | 0.058 | 0.003  | 0     |
|            | IM             | 0.742         | 0.236 | -     | 0.263 | 0.226  | 0.062 |
|            | AM             | 0.942         | 0.491 | 0.02  | -     | 0.0119 | 0     |
|            | SC             | 0.925         | 0.119 | 0.02  | 0.169 | -      | 0.019 |
|            | PAN            | 0.16          | 0.039 | 0.02  | 0.04  | 0.677  | -     |
| <b>RIS</b> | I              | 0.876         | -     | 0.041 | 0.115 | 0.051  | 0     |
|            | IM             | 0.868         | 0.2   | -     | 0.328 | 0.151  | 0.01  |
|            | AM             | 0.885         | 0.647 | 0.041 | -     | 0.026  | 0     |
|            | SC             | 0.698         | 0.029 | 0.041 | 0.095 | -      | 0.026 |
|            | PAN            | 0.011         | 0     | 0.016 | 0.041 | 0.047  | -     |

Table S3: Confidence measure in model selection inferred from 1000 pseudo observed dataset by pairs for the strict isolation (SI) model and panmictic (PAN) model.

|             |     | Type I error |       |       |       |       |       | Type II error |       |       |       |       |       |
|-------------|-----|--------------|-------|-------|-------|-------|-------|---------------|-------|-------|-------|-------|-------|
| Focal model |     | AA           | BET   | BRE   | HEM   | OIR   | RIS   | AA            | BET   | BRE   | HEM   | OIR   | RIS   |
| SI versus   | IM  | 0            | 0     | 0     | 0     | 0     | 0     | 0             | 0.092 | 0.031 | 0.087 | 0.037 | 0.066 |
|             | AM  | 0.337        | 0.949 | 0.078 | 0.283 | 0.745 | 0.98  | 0.609         | 0.103 | 0.881 | 0.7   | 0.214 | 0.046 |
|             | SC  | 0            | 0     | 0     | 0     | 0     | 0     | 0             | 0.068 | 0.029 | 0.073 | 0.023 | 0.05  |
|             | PAN | 0            | 0.001 | 0     | 0     | 0.01  | 0.004 | 0             | 0     | 0     | 0     | 0.106 | 0     |

|             |    | Type I error |     |     |       |     |     | Type II error |       |     |     |       |       |
|-------------|----|--------------|-----|-----|-------|-----|-----|---------------|-------|-----|-----|-------|-------|
| Focal model |    | AA           | BET | BRE | HEM   | OIR | RIS | AA            | BET   | BRE | HEM | OIR   | RIS   |
| PAN versus  | IM | 0            | 0   | 0   | 0.002 | 0   | 0   | 0.005         | 0.023 | 0   | 0   | 0.009 | 0.027 |
|             | AM | 0            | 0   | 0   | 0.001 | 0   | 0   | 0.001         | 0.01  | 0   | 0   | 0.095 | 0.022 |
|             | SC | 0            | 0   | 0   | 0     | 0   | 0   | 0             | 0     | 0   | 0   | 0     | 0     |
|             | SI | 0            | 0   | 0   | 0     | 0   | 0   | 0             | 0.001 | 0   | 0   | 0.01  | 0.004 |

**Table S4: Estimation of variable importance from random-forest analyses**  
 Estimation is performed pairwise for computational tractability.  
 For each pairwise comparison, the three most discriminatory variables are in bold.

| Summary Stat             | MODEL        |              |              |              |              |              |              |              |               |               |               | Average      |
|--------------------------|--------------|--------------|--------------|--------------|--------------|--------------|--------------|--------------|---------------|---------------|---------------|--------------|
|                          | lvsAM        | lvsIM        | lvsSC        | lvsPAN       | AmvsIM       | Scvs AM      | AmvsPAN      | SCvsIM       | ImvsPAN       | PANvsIM       | ScvsPAN       |              |
| mean He pop1*            | <b>76.64</b> | 31.58        | 30.98        | 18.37        | 35.76        | 38.31        | 19.66        | 24.23        | 37.28         | 37.28         | 38.94         | 32.62        |
| var He pop1              | 55.06        | 26.87        | 25.24        | 12.90        | 24.56        | 27.62        | 10.53        | 19.00        | 27.76         | 27.76         | 27.45         | 23.35        |
| mean He pop2*            | 45.32        | 27.99        | 29.70        | 19.03        | 38.88        | 40.61        | 21.76        | 18.55        | 46.75         | 46.75         | 48.50         | 37.16        |
| var He pop2              | 37.46        | 21.60        | 22.84        | 13.88        | 33.64        | 35.13        | 13.10        | 17.17        | 29.06         | 29.06         | 28.48         | 25.33        |
| mean He total            | 58.42        | <b>48.69</b> | <b>48.79</b> | 17.88        | <b>67.61</b> | <b>66.55</b> | 24.14        | 25.90        | 42.59         | 42.59         | 45.80         | 41.26        |
| var He total             | 42.27        | 35.04        | 32.25        | 16.30        | 32.66        | 36.05        | 12.12        | 20.94        | 28.28         | 28.28         | 28.18         | 25.64        |
| mean Ar pop1             | <b>90.18</b> | 27.56        | 28.04        | 13.33        | 35.17        | 36.22        | 13.05        | 25.68        | 30.79         | 30.79         | 26.85         | 27.23        |
| var Ar pop1              | 49.78        | 23.27        | 22.09        | 10.40        | 36.39        | 38.03        | 14.59        | 19.10        | 25.36         | 25.36         | 25.48         | 24.66        |
| mean Ar pop2             | 57.54        | 25.95        | 25.37        | 13.16        | 34.15        | 31.60        | 15.00        | 28.02        | 22.31         | 22.31         | 22.68         | 23.65        |
| var Ar pop2              | 46.81        | 25.68        | 22.56        | 10.06        | 36.83        | 35.89        | 8.23         | 23.40        | 16.03         | 16.03         | 18.05         | 19.61        |
| mean Ar total            | 56.41        | 38.12        | 44.20        | 14.32        | 43.63        | 52.08        | 16.48        | 23.71        | 27.01         | 27.01         | 24.98         | 28.54        |
| var Ar total             | 61.87        | 21.91        | 22.81        | 11.07        | 31.53        | 35.19        | 11.97        | 19.85        | 23.42         | 23.42         | 25.35         | 23.20        |
| mean R pop1              | 47.75        | 30.25        | 30.34        | 8.61         | 37.93        | 39.47        | 10.77        | 21.22        | 21.85         | 21.85         | 20.81         | 22.66        |
| var R pop1               | 57.89        | 41.89        | 42.03        | 7.08         | 43.97        | 47.00        | 9.64         | 27.19        | 18.67         | 18.67         | 18.13         | 23.22        |
| mean R pop2              | 59.87        | 27.06        | 32.17        | 11.53        | 26.88        | 32.14        | 12.87        | 27.23        | 26.38         | 26.38         | 23.35         | 24.72        |
| var R pop2               | 69.44        | 36.76        | 46.21        | 9.39         | 39.87        | 46.10        | 9.37         | 23.71        | 21.94         | 21.94         | 18.44         | 23.58        |
| mean R total             | 44.62        | 27.08        | 28.98        | 11.01        | 32.01        | 35.34        | 11.42        | 17.09        | 22.67         | 22.67         | 22.07         | 21.88        |
| var R total              | 46.63        | 21.70        | 21.47        | 7.86         | 30.13        | 29.35        | 9.54         | 21.86        | 19.34         | 19.34         | 16.84         | 19.38        |
| var GW pop1              | <b>94.41</b> | 39.08        | 43.83        | 11.70        | 37.76        | 37.70        | 11.88        | 22.05        | 28.71         | 28.71         | 28.28         | 26.22        |
| mean GW pop1             | 50.64        | 25.46        | 20.65        | 9.07         | 37.06        | 38.73        | 6.98         | 12.90        | 13.26         | 13.26         | 16.00         | 16.85        |
| var GW pop2              | 64.23        | 31.60        | 37.27        | 12.00        | 31.62        | 37.62        | 12.35        | 25.52        | 26.56         | 26.56         | 25.91         | 25.75        |
| mean GW pop2             | 43.42        | 26.60        | 21.40        | 7.83         | 40.62        | 38.83        | 7.77         | 8.55         | 15.02         | 15.02         | 14.02         | 16.54        |
| var GW total             | 59.44        | 31.61        | 31.51        | 9.88         | 35.88        | 38.19        | 10.89        | 20.88        | 26.82         | 26.82         | 27.07         | 25.11        |
| mean GW total            | 39.53        | 24.50        | 22.06        | 6.14         | 38.91        | 34.47        | 5.46         | 18.77        | 12.46         | 12.46         | 13.00         | 16.10        |
| mean GST                 | 65.74        | <b>62.09</b> | <b>66.67</b> | <b>34.69</b> | <b>80.61</b> | <b>85.93</b> | <b>57.28</b> | <b>34.11</b> | <b>84.59</b>  | <b>84.59</b>  | <b>84.41</b>  | <b>71.82</b> |
| var GST                  | 37.25        | 37.52        | 38.70        | 27.29        | 51.50        | 50.54        | 40.93        | <b>30.75</b> | <b>104.78</b> | <b>104.78</b> | <b>107.81</b> | <b>73.27</b> |
| mean deltam <sup>2</sup> | 71.55        | <b>74.59</b> | <b>72.38</b> | <b>52.09</b> | <b>76.51</b> | <b>76.05</b> | <b>61.36</b> | <b>33.14</b> | <b>103.26</b> | <b>103.26</b> | <b>98.59</b>  | <b>79.28</b> |
| var deltam <sup>2</sup>  | 60.48        | 43.46        | 44.62        | <b>41.85</b> | 47.22        | 48.70        | <b>45.17</b> | 23.59        | 57.10         | 57.10         | 60.18         | 48.64        |

\*Pop 1 = *Lampetra fluviatilis* population

\*Pop 2 = *Lampetra planeri* population

Table S5: **Robustness of summary statistics computation under the two best models (IM and SC).** Estimation based on 10 00 dataset drawn from the posterior distribution of the parameters. Summary statistics that deviate significantly from the observed distribution are in bold.

| Statistics          | IM               |                  |              |                  |                  | SC           |                  |              |               |               | PAN      |
|---------------------|------------------|------------------|--------------|------------------|------------------|--------------|------------------|--------------|---------------|---------------|----------|
|                     | AA               | BET              | BRE          | HEM              | RIS              | AA           | BET              | BRE          | HEM           | RIS           | OIR      |
| mean_He_pop1        | 0.9915           | 0.9912           | 0.997        | 0.9888           | 1                | 1            | 1                | 1            | 0.9485        | 0.9994        | 1        |
| <b>var_He_pop1</b>  | <b>4.00E-004</b> | <b>2.00E-004</b> | <b>0.002</b> | <b>4.00E-004</b> | <b>0</b>         | <b>0</b>     | <b>1.00E-004</b> | <b>0</b>     | <b>0.0089</b> | <b>0</b>      | 1        |
| mean_He_pop2        | 0.8836           | 0.9962           | 0.962        | 0.8489           | 1                | 0.948        | 1                | 1            | 0.8033        | 0.9859        | 1        |
| <b>var_He_pop2</b>  | <b>0.0471</b>    | <b>1.00E-004</b> | <b>0.01</b>  | <b>0.0156</b>    | <b>6.00E-004</b> | <b>0.033</b> | <b>0</b>         | <b>0</b>     | <b>0.0451</b> | <b>0.0316</b> | 1        |
| mean_He_total       | 0.9539           | 0.9984           | 0.999        | 0.9752           | 1                | 0.997        | 1                | 1            | 0.9111        | 0.9995        | 1        |
| <b>var_He_total</b> | <b>0.0011</b>    | <b>0</b>         | <b>0.002</b> | <b>1.00E-004</b> | <b>0</b>         | <b>0.01</b>  | <b>0</b>         | <b>0</b>     | <b>0.011</b>  | <b>0</b>      | 1        |
| mean_A_pop1         | 0.9909           | 0.9912           | 0.999        | 0.9889           | 1                | 1            | 1                | 1            | 0.9491        | 0.9994        | 1        |
| <b>var_A_pop1</b>   | <b>4.00E-004</b> | <b>5.00E-004</b> | <b>0.001</b> | <b>4.00E-004</b> | <b>0</b>         | <b>0</b>     | <b>1.00E-004</b> | <b>0</b>     | <b>0.0097</b> | <b>0</b>      | 1        |
| mean_A_pop2         | 0.887            | 0.9962           | 0.967        | 0.8542           | 1                | 0.962        | 1                | 1            | 0.8079        | 0.9864        | 1        |
| <b>var_A_pop2</b>   | <b>0.0384</b>    | <b>1.00E-004</b> | <b>0.01</b>  | <b>0.0132</b>    | <b>7.00E-004</b> | <b>0.031</b> | <b>0</b>         | <b>0</b>     | <b>0.0405</b> | <b>0.0342</b> | 1        |
| mean_A_total        | 0.9549           | 0.9984           | 0.999        | 0.9765           | 1                | 0.997        | 1                | 1            | 0.9128        | 0.9995        | 1        |
| <b>var_A_total</b>  | <b>0.0011</b>    | <b>0</b>         | <b>0.002</b> | <b>0</b>         | <b>0</b>         | <b>0.01</b>  | <b>0</b>         | <b>0</b>     | <b>0.0103</b> | <b>0</b>      | 1        |
| mean_Ar_pop1        | 0.9928           | 0.9906           | 1            | 0.9978           | 1                | 1            | 1                | 1            | 0.9776        | 0.9999        | 1        |
| var_Ar_pop1         | 0.2832           | 0.3585           | 0.435        | 0.2961           | 0.4841           | 0.598        | 0.4826           | 0.732        | 0.2514        | 0.6358        | <b>0</b> |
| mean_Ar_pop2        | 0.9075           | 0.9962           | 0.934        | 0.9931           | 1                | 0.999        | 1                | 1            | 0.8948        | 0.99          | 1        |
| var_Ar_pop2         | 0.6802           | 0.4688           | <b>0.045</b> | 0.3868           | 0.5767           | 0.882        | 0.4959           | 0.352        | 0.4541        | 0.6036        | <b>0</b> |
| mean_Ar_total       | 0.9909           | 0.9999           | 0.98         | 0.9982           | 1                | 1            | 1                | 0.999        | 0.9849        | 0.9991        | 1        |
| var_Ar_total        | 0.3833           | 0.4709           | 0.109        | 0.4236           | 0.6422           | 0.629        | 0.569            | 0.376        | 0.3807        | 0.6889        | <b>0</b> |
| mean_V_pop1         | 0.9926           | 0.9906           | 1            | 0.9978           | 1                | 1            | 1                | 1            | 0.9767        | 0.9999        | 1        |
| var_V_pop1          | 0.2701           | 0.3257           | 0.439        | 0.2796           | 0.4769           | 0.586        | 0.4457           | 0.736        | 0.2421        | 0.6298        | <b>0</b> |
| mean_V_pop2         | 0.9057           | 0.996            | 0.928        | 0.9924           | 1                | 0.999        | 1                | 1            | 0.8929        | 0.9895        | 1        |
| var_V_pop2          | 0.6692           | 0.4395           | <b>0.044</b> | 0.3845           | 0.5762           | 0.874        | 0.458            | 0.341        | 0.4504        | 0.6036        | <b>0</b> |
| mean_V_total        | 0.9909           | 0.9999           | 0.979        | 0.9981           | 1                | 1            | 1                | 0.999        | 0.9845        | 0.9987        | 1        |
| var_V_total         | 0.3747           | 0.4431           | 0.109        | 0.4195           | 0.638            | 0.621        | 0.5385           | 0.377        | 0.3764        | 0.6837        | <b>0</b> |
| mean_R_pop1         | 0.9785           | 0.9916           | 1            | 0.9916           | 1                | 0.999        | 1                | 1            | 0.9508        | 0.9999        | 1        |
| var_R_pop1          | 0.8185           | 0.9522           | 0.989        | 0.8252           | 0.9995           | 0.916        | 0.9818           | 1            | 0.7275        | 0.9991        | 1        |
| mean_R_pop2         | 0.974            | 0.9997           | 0.164        | 0.9702           | 0.9999           | 1            | 1                | 0.713        | 0.8687        | 0.9832        | 1        |
| var_R_pop2          | 0.9956           | 0.9867           | <b>0.006</b> | 0.6688           | 0.962            | 1            | 0.9954           | 0.249        | 0.5827        | 0.9346        | 1        |
| mean_R_total        | 0.9874           | 1                | 0.441        | 0.9884           | 1                | 1            | 1                | 0.848        | 0.9425        | 0.9988        | <b>0</b> |
| var_R_total         | 0.8553           | 0.9729           | 0.108        | 0.8635           | 0.9782           | 0.934        | 0.9892           | 0.635        | 0.787         | 0.967         | <b>0</b> |
| mean_GW_pop1        | 0.4724           | <b>0.0458</b>    | 0.075        | 0.5732           | <b>4.00E-004</b> | 0.513        | <b>0.0192</b>    | <b>0.009</b> | 0.6205        | <b>0.003</b>  | <b>0</b> |
| var_GW_pop1         | 0.783            | 0.6298           | 0.954        | 0.8314           | 0.6711           | 0.83         | 0.6003           | 0.921        | 0.8376        | 0.7077        | <b>0</b> |
| mean_GW_pop2        | <b>0.0285</b>    | <b>0.0242</b>    | 0.99         | <b>0.0197</b>    | 0.2775           | <b>0.002</b> | <b>0.0055</b>    | 0.901        | 0.0849        | 0.2945        | <b>0</b> |
| var_GW_pop2         | 0.9567           | 0.5846           | 0.182        | <b>0</b>         | 0.462            | 0.967        | 0.5361           | 0.216        | <b>0.012</b>  | 0.4693        | 1        |
| mean_GW_total       | 0.4408           | <b>0.0326</b>    | 1            | 0.7969           | 0.0809           | 0.456        | <b>0.0119</b>    | 0.975        | 0.8305        | 0.0972        | 1        |
| var_GW_total        | 0.7364           | 0.6681           | 0.907        | 0.9359           | 0.2853           | 0.794        | 0.6458           | 0.852        | 0.9416        | 0.2726        | <b>0</b> |
| mean_GST            | 0.2031           | 0.3586           | 0.546        | 0.5067           | 0.7748           | 0.191        | 0.2718           | 0.015        | 0.3924        | 0.6114        | <b>0</b> |
| <b>var_GST</b>      | 0.0845           | <b>0.0245</b>    | 0.76         | 0.2878           | 0.2154           | 0.046        | <b>0.0045</b>    | <b>0.091</b> | 0.3036        | 0.2239        | 1        |
| mean_deltamu2       | 0.9328           | 0.9917           | 0.117        | 0.8329           | 0.979            | 0.976        | 0.9969           | 0.181        | 0.7456        | 0.9464        | 1        |
| var_deltamu2        | 0.9387           | 0.9883           | 0.17         | 0.6931           | 0.9705           | 0.979        | 0.9944           | 0.243        | 0.6096        | 0.9378        | 1        |

**Table S6: Untransformed Estimates of demographic parameters under the model of ongoing migration (IM) and secondary contact (SC) in each river.**  $\Theta=4*N_{ref}*\mu$  with  $\mu$  the mutation rate. Lf = *lampetra fluviatilis*, Lp = *Lampetra planeri*. \* the PAN model is controlled by a single parameter the effective population size of the single population (made of both Lf and Lp backgrounds).

| River      | Model | $\theta_{Lf}$     | $\theta_{Lp}$    | $\theta_{Ancestral}$<br>population | M=4Nref*m<br>Lp to Lf | M=4Nref*m<br>from Lf to Lp | Tsplit/(4Nref)      | Tsc/(4Nref)       |
|------------|-------|-------------------|------------------|------------------------------------|-----------------------|----------------------------|---------------------|-------------------|
|            |       | med [95HPD]       | med [95HPD]      | med [95HPD]                        | med [95HPD]           | med [95HPD]                | med [95HPD]         | med [95HPD]       |
| <b>AA</b>  | IM    | 1.31[0.93-.2.02]  | 0.41[0.29-0.68]  | 2.29 [2.26-2.35.]                  | 10 [7.0-12.6]         | 11.9 [10.9-12.8]           | 13.4 [12.3-14.1]    |                   |
|            | SC    | 1.48 [0.76-.2.55] | 0.39 [0.27-0.62] | 1.85 [1.60-2.11]                   | 8.82 [8.10-9.98]      | 12.67 [11.8-13.25]         | 9.56 [8.40-11.5]    | 4.46 [3.07-5.40]  |
| <b>BET</b> | IM    | 1.62 [1.26-2.35]  | 0.94 [0.43-1.54] | 1.65 [1.50-1.78]                   | 11.75 [10.96-12.72]   | 13.92 [13.02-14.93]        | 1.49 [1.21-1.71]    |                   |
|            | SC    | 1.93 [1.28-2.63]  | 0.94 [0.57-1.42] | 1.16 [1.03-1.30]                   | 9.44 [8.03-10.86]     | 13.28 [12.78-14.98]        | 16.14 [13.28-19.82] | 8.23 [5.80-10.64] |
| <b>BRE</b> | IM    | 1.02 [0.44-2.45]  | 0.31 [0.12-0.79] | 1.36 [0.44-2.37]                   | 1.50 [0.39—6.06]      | 7.98 [2.43-15.49]          | 13.73 [4.99-22.69]  |                   |
|            | SC    | 1.61 [0.91-2.72]  | 0.74 [0.22-1.50] | 1.44 [0.32-2.62]                   | 6.68 [1.77-16.35]     | 9.88 [2.79-18.18]          | 13.48 [7.04-22.32]  | 1.02 [0.19-.6.23] |
| <b>HEM</b> | IM    | 1.00 [0.71-.194]  | 0.19 [0.13-0.31] | 2.60 [2.48-2.70]                   | 8.12 [6.73-10.75]     | 16.92 [15.74-17.68]        | 12.01 [9.56-13.50]  |                   |
|            | SC    | 0.86 [0.66-1.28]  | 0.35 [0.08-0.88] | 1.68 [1.50-1.88]                   | 12.45 [11.13-13.64]   | 9.67 [7.83-11.72]          | 13.93 [11.57-16.44] | 4.97 [4.27-5.50]  |
| <b>RIS</b> | IM    | 0.84 [0.60-1.54]  | 0.62 [0.50-0.88] | 0.84 [0.77-0.93]                   | 8.52 [5.90-11.96]     | 9.83 [7.24-12.55]          | 9.85 [9.09-10.47]   |                   |
|            | SC    | 1.36 [0.84-2.32]  | 0.64 [0.39-1.03] | 1.01 [0.66-1.52]                   | 14.45 [13.42-15.45]   | 14.78 [14.36-15.23]        | 11.31 [8.43-16.02]  | 4.56 [2.13-7.59]  |
| <b>OIR</b> | PAN*  | 2.05 [1.94-2.18]  |                  |                                    |                       |                            |                     |                   |

**Figure S1: Curves of out-of-bag errors rates and Estimation of variable importance for each population pairs.**

Data based on one random forest, each composed of 1,000 trees obtained from a trained set of 50,000 simulated predictor variables (summary statistics). The response variable is the demographic model.

Each page corresponds to a different river:

(A) AA

(B) BET

(C) BRE

(D) HEM

(E) OIR

(F) RIS

(A)

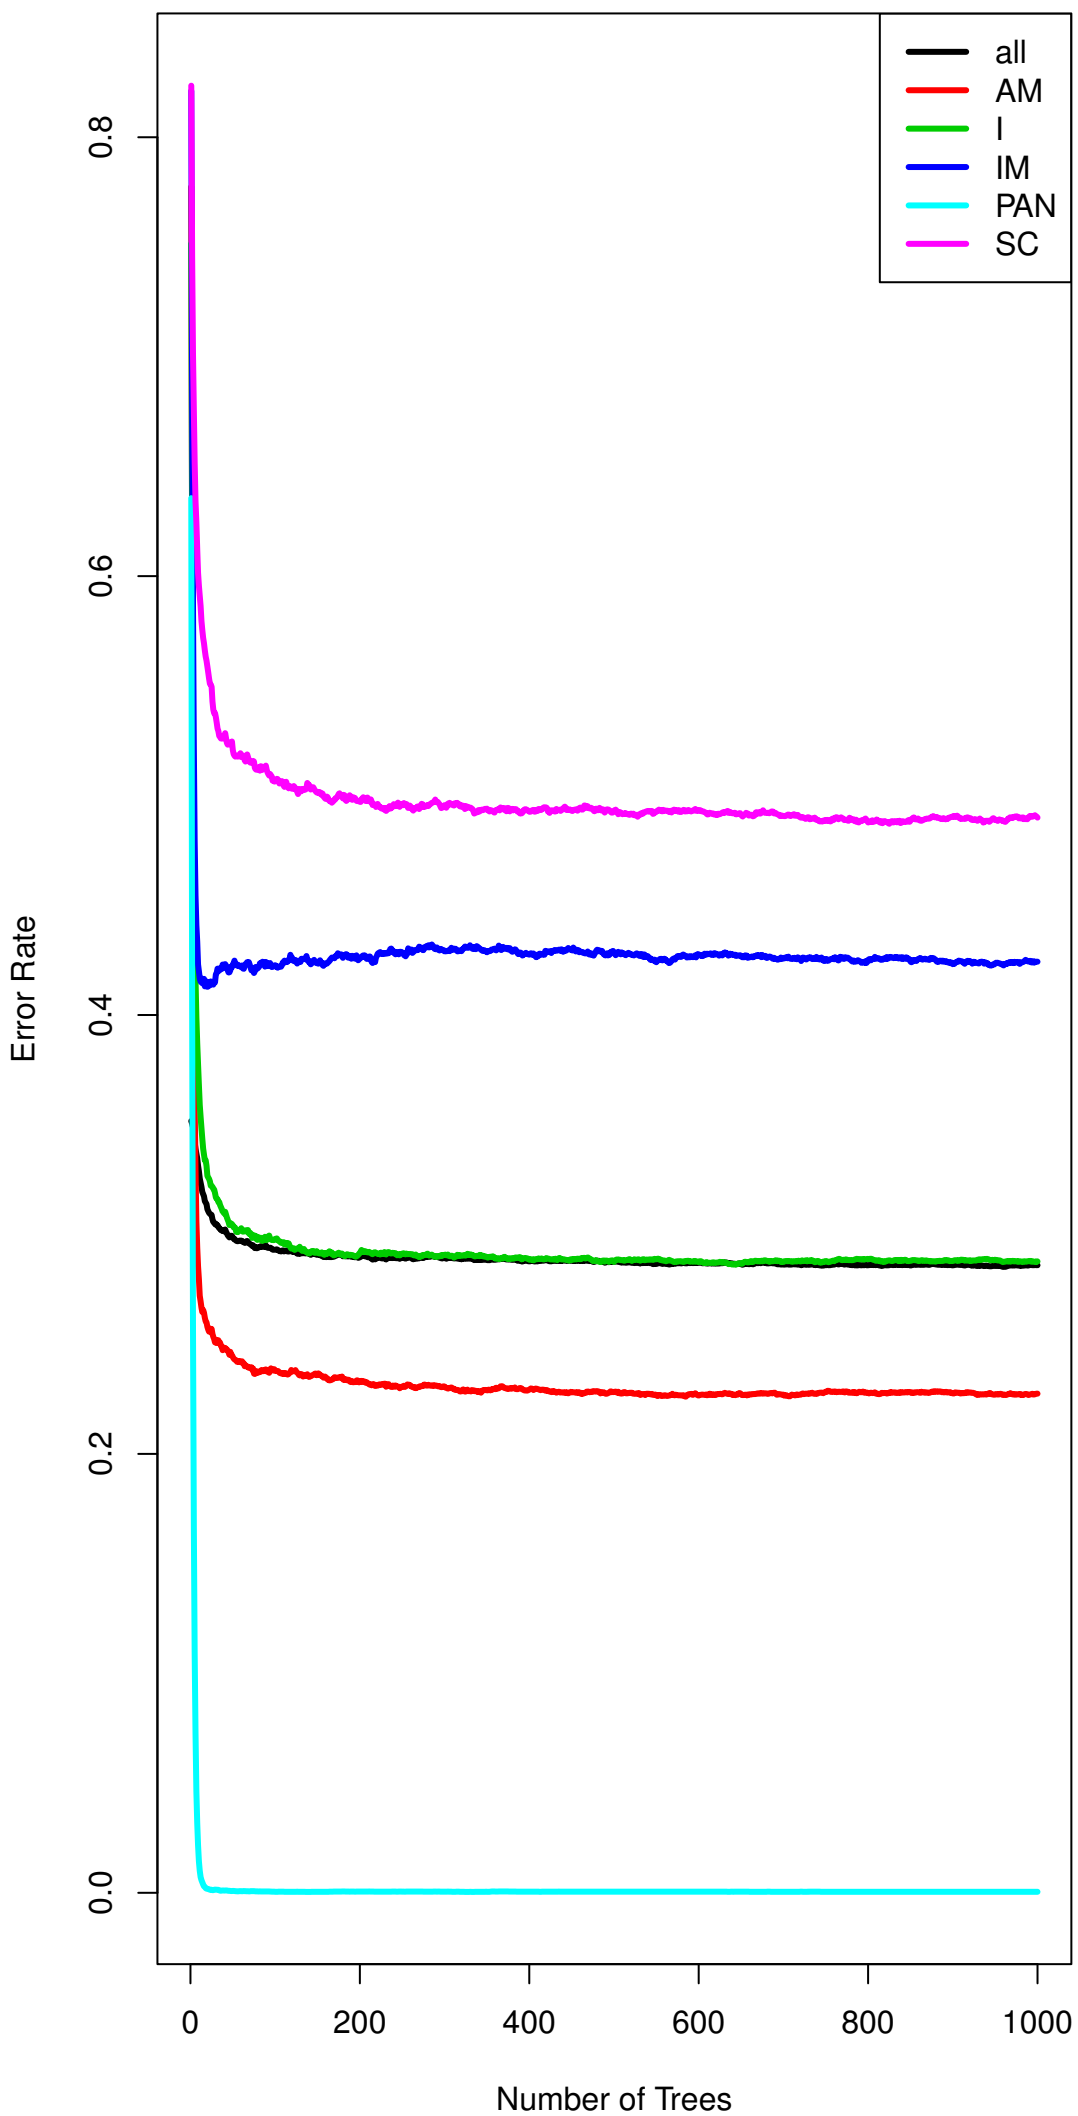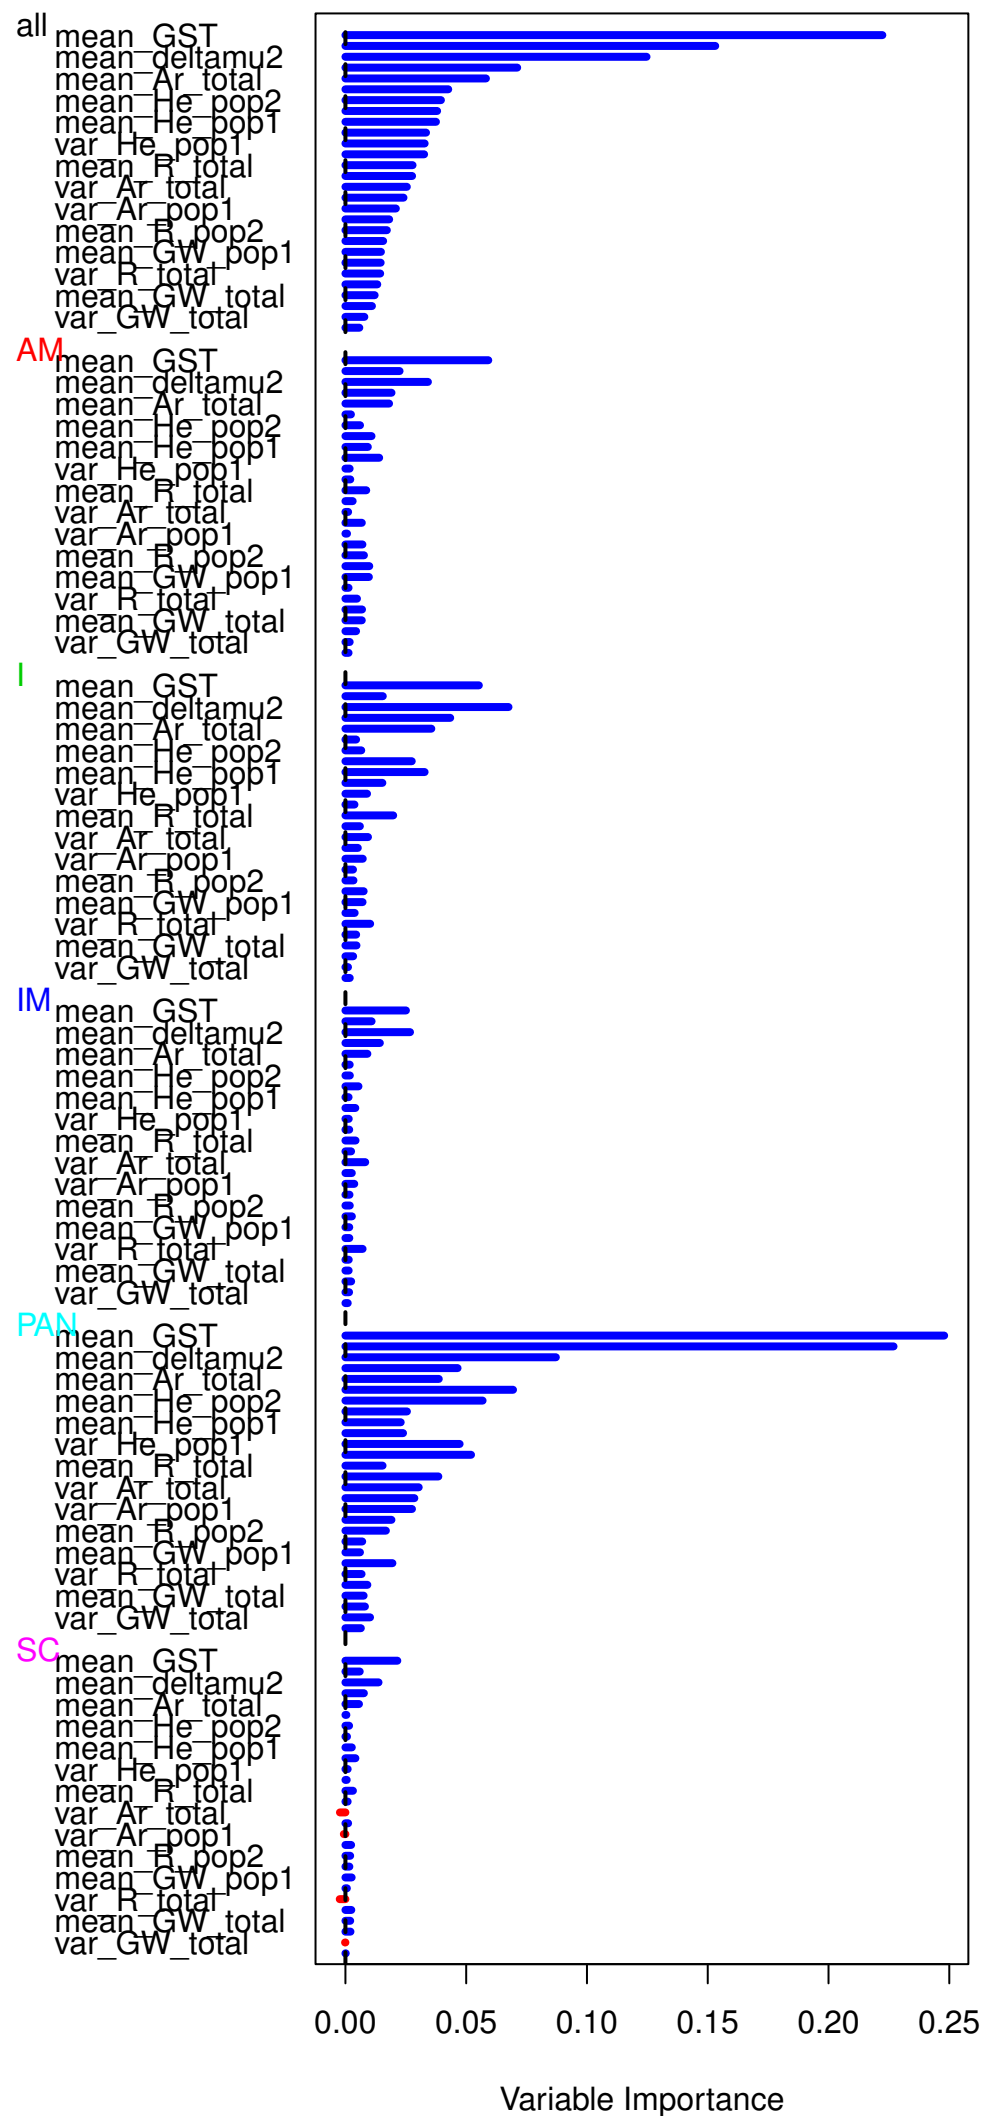



(B)

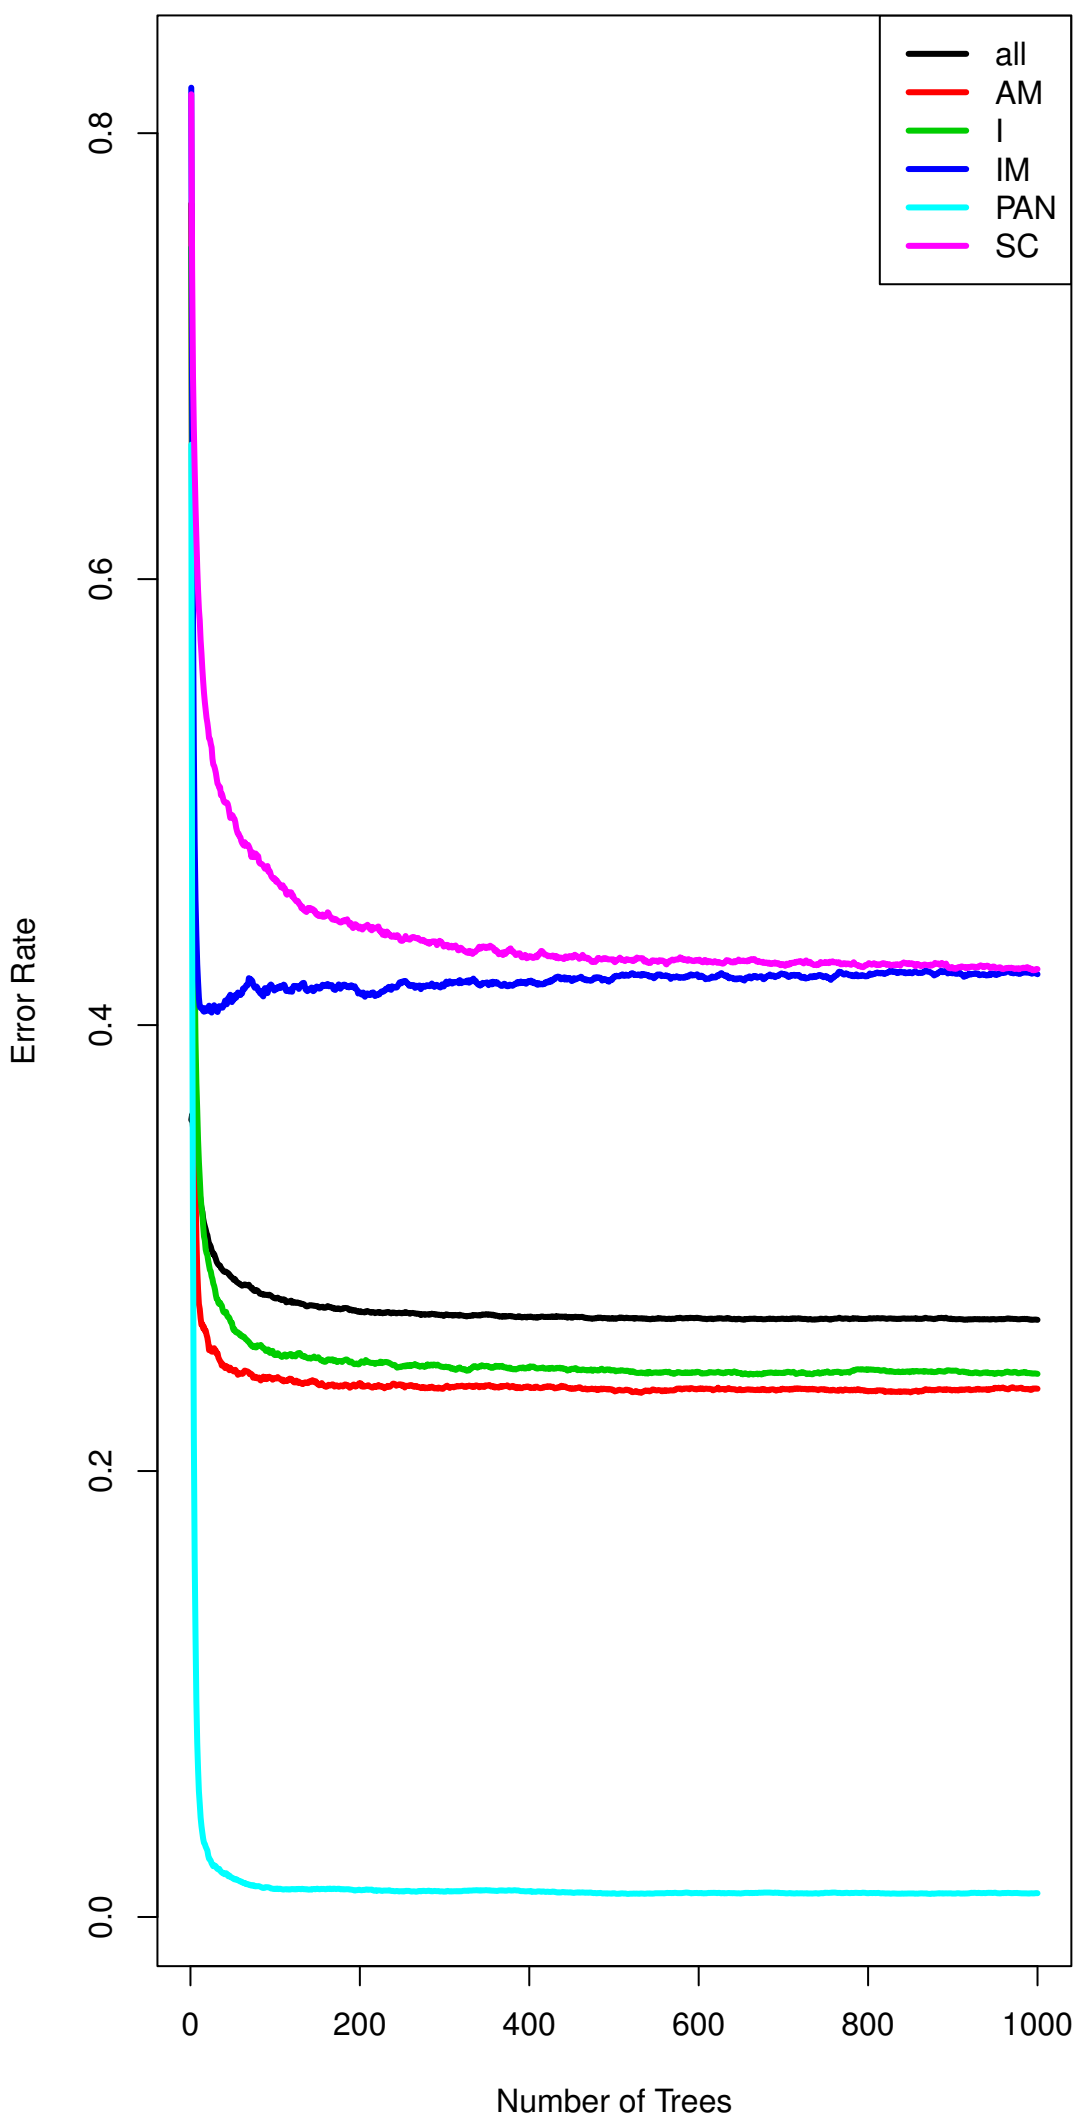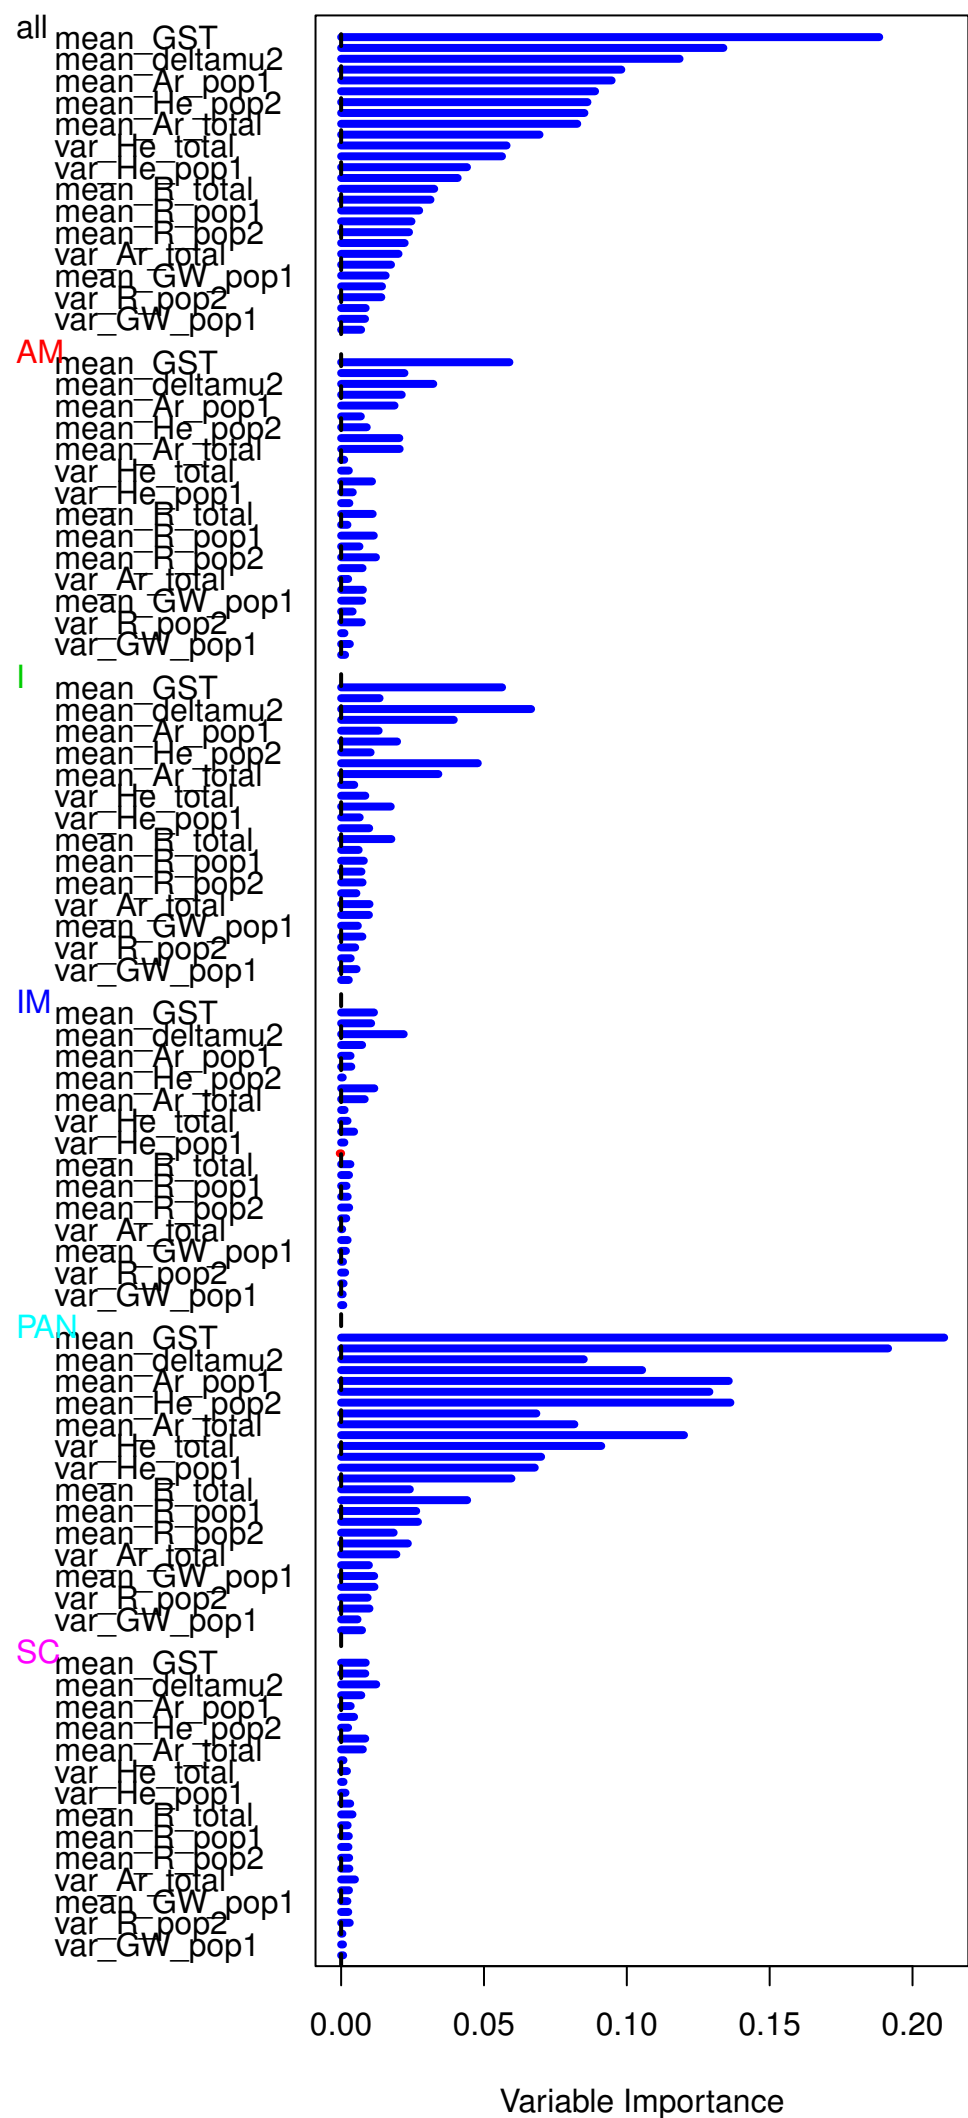

(C)

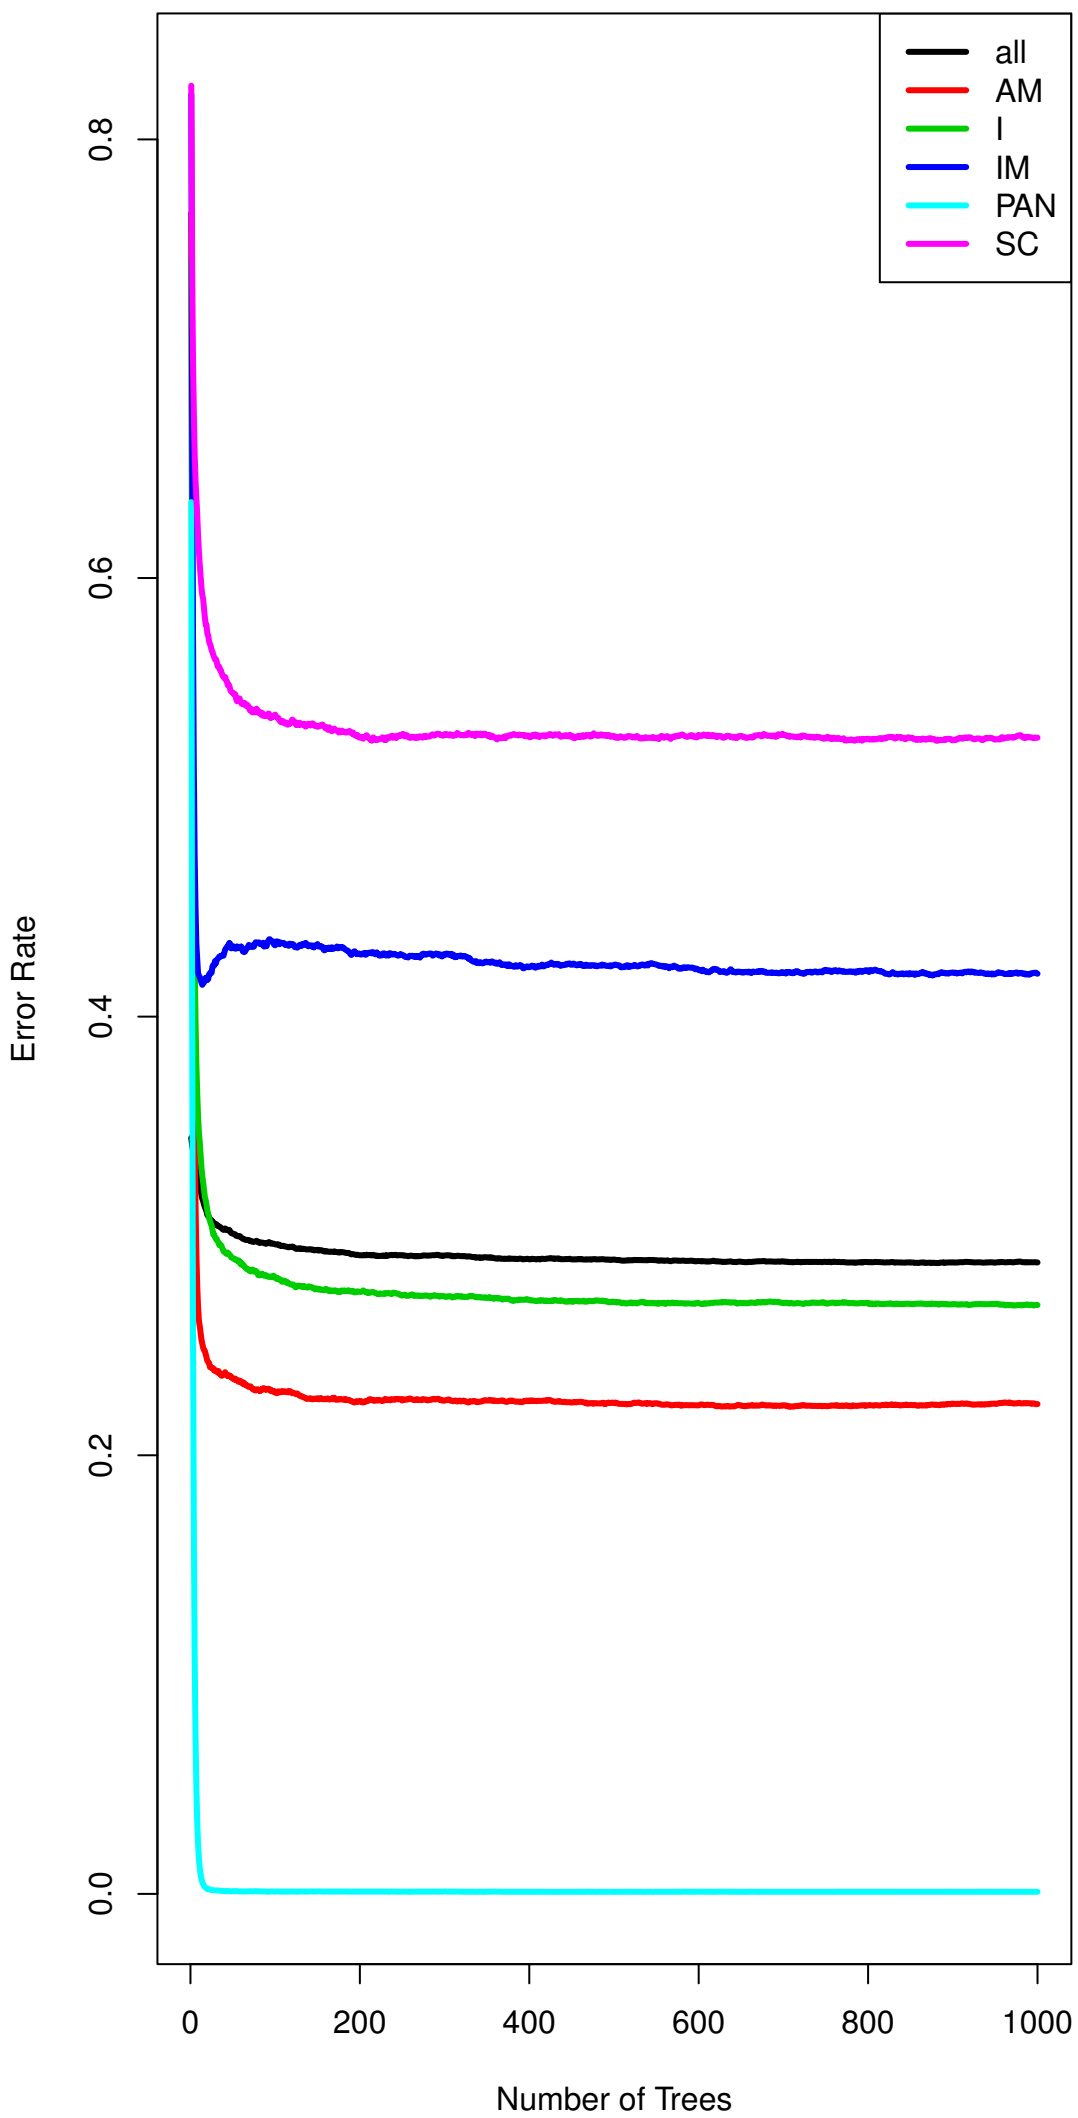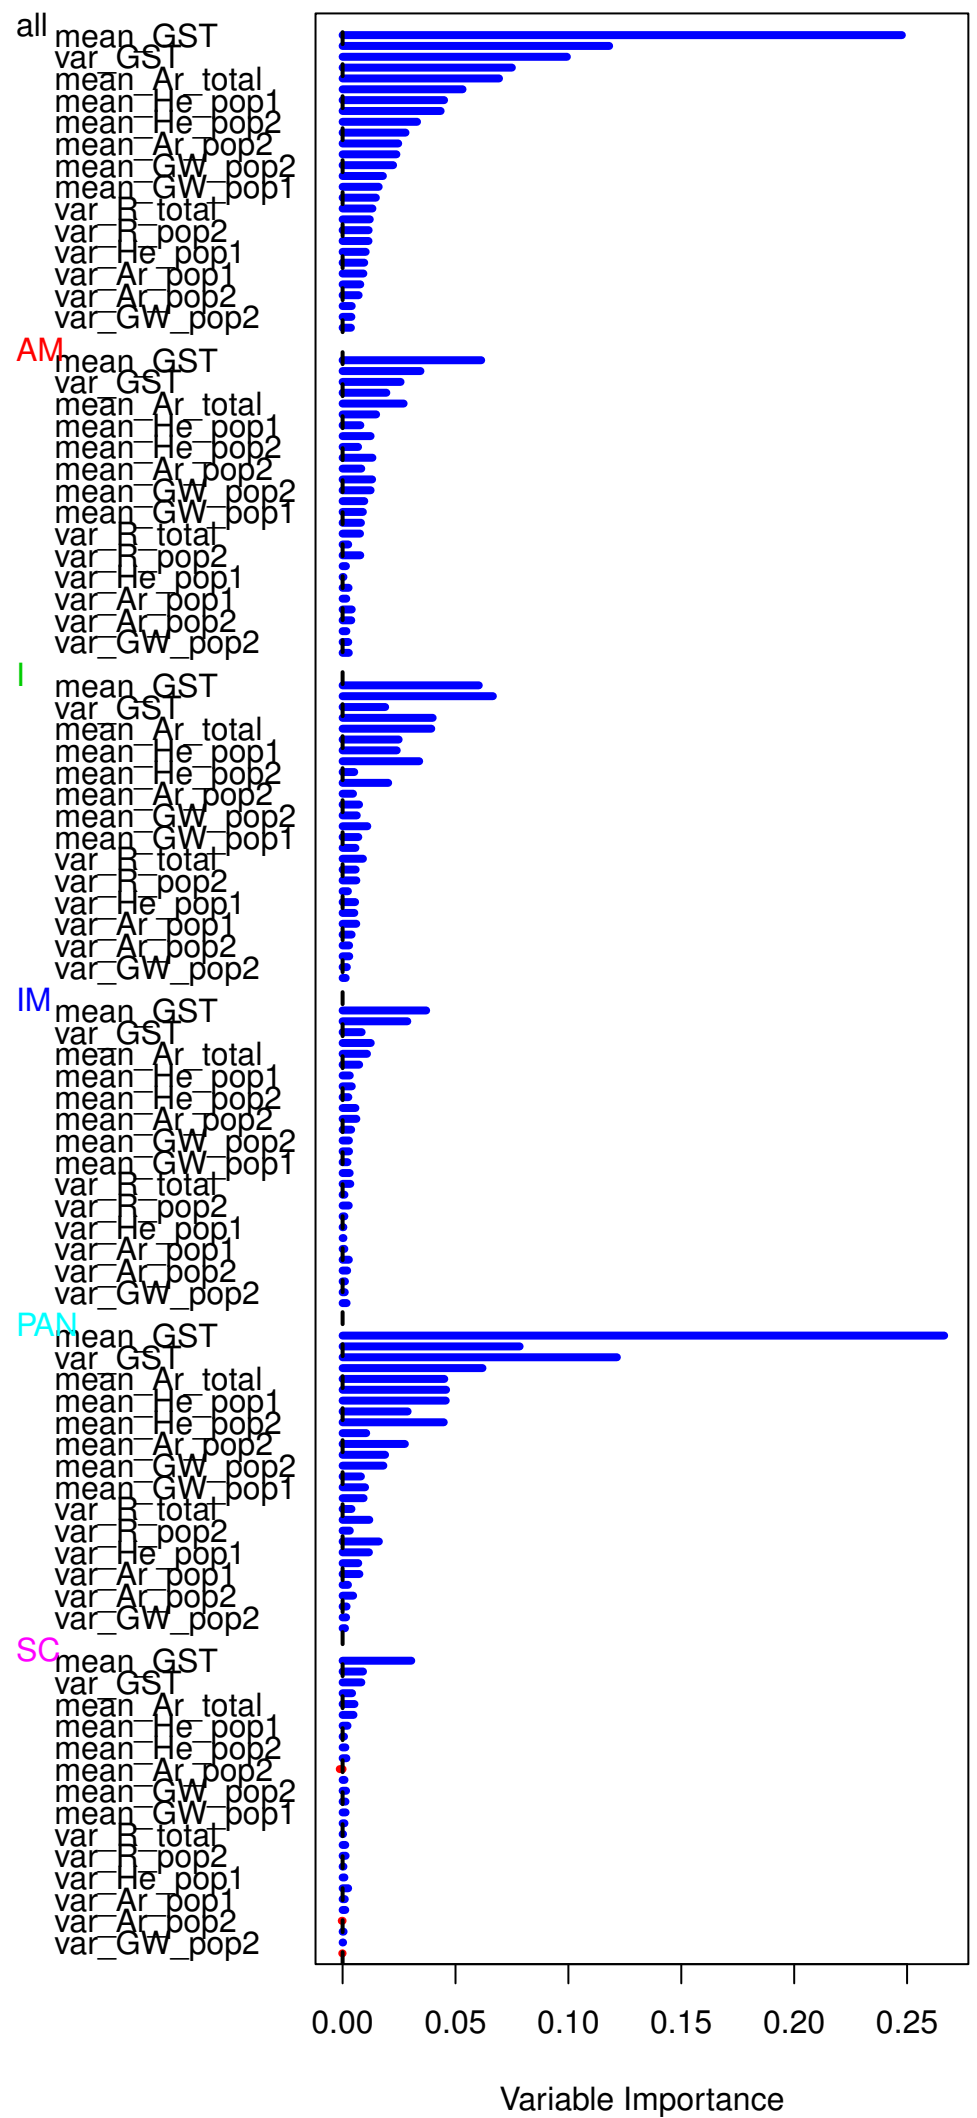

(D)

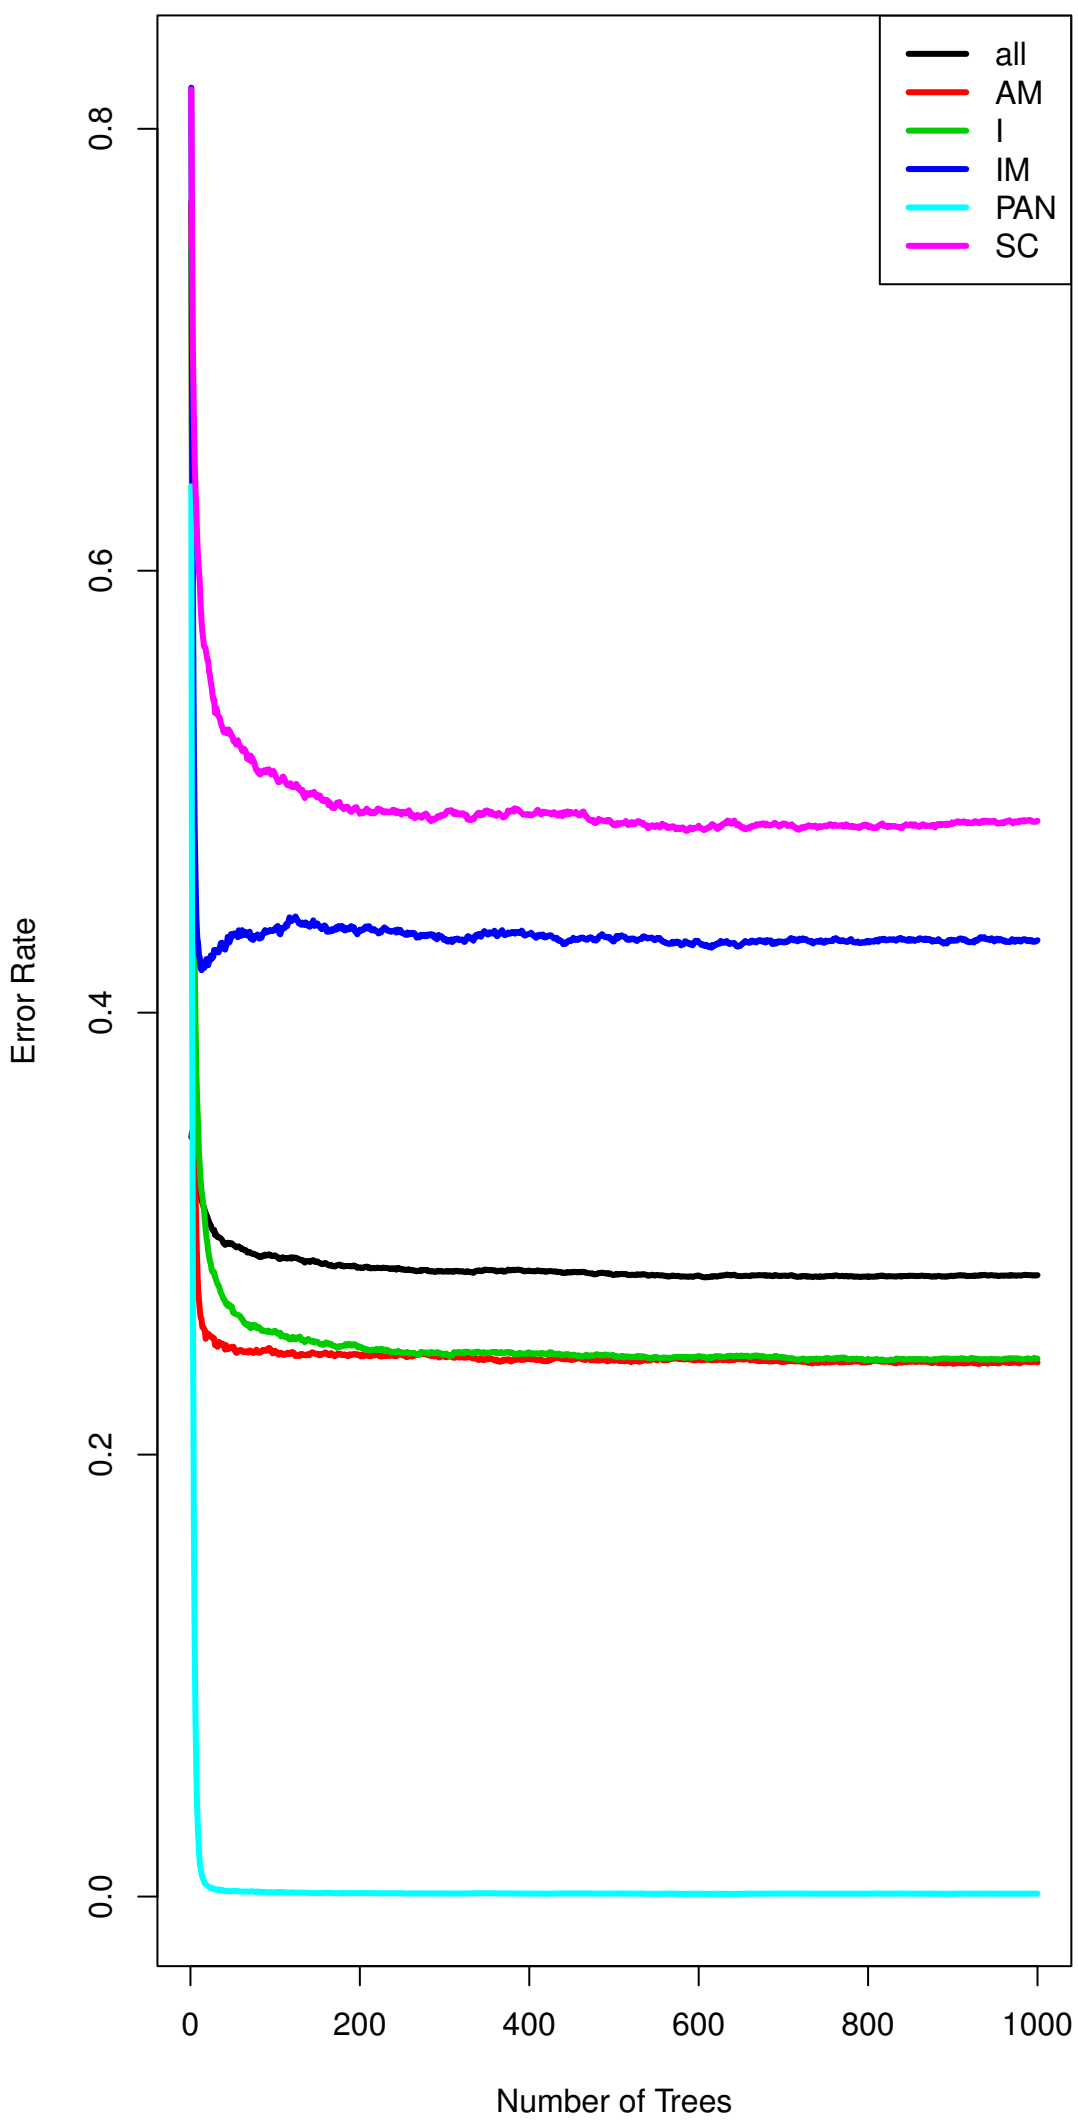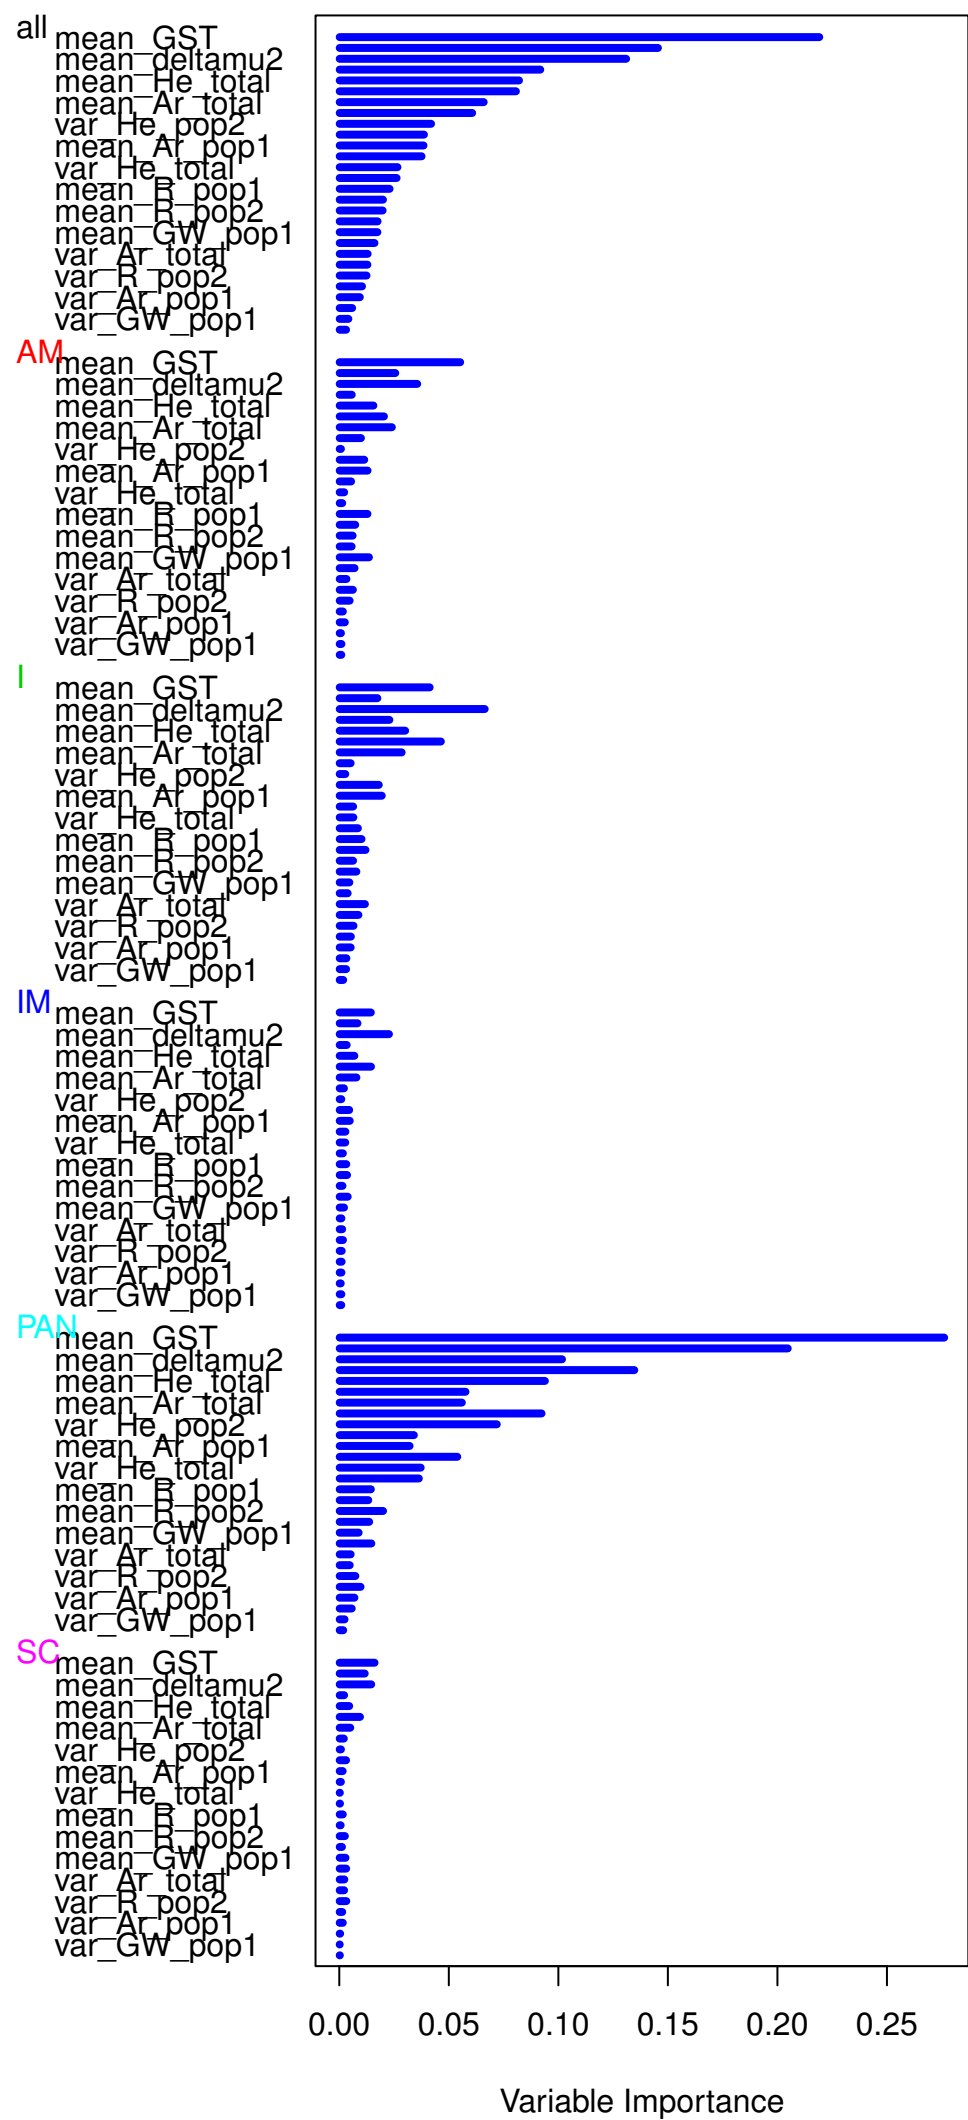

(E)

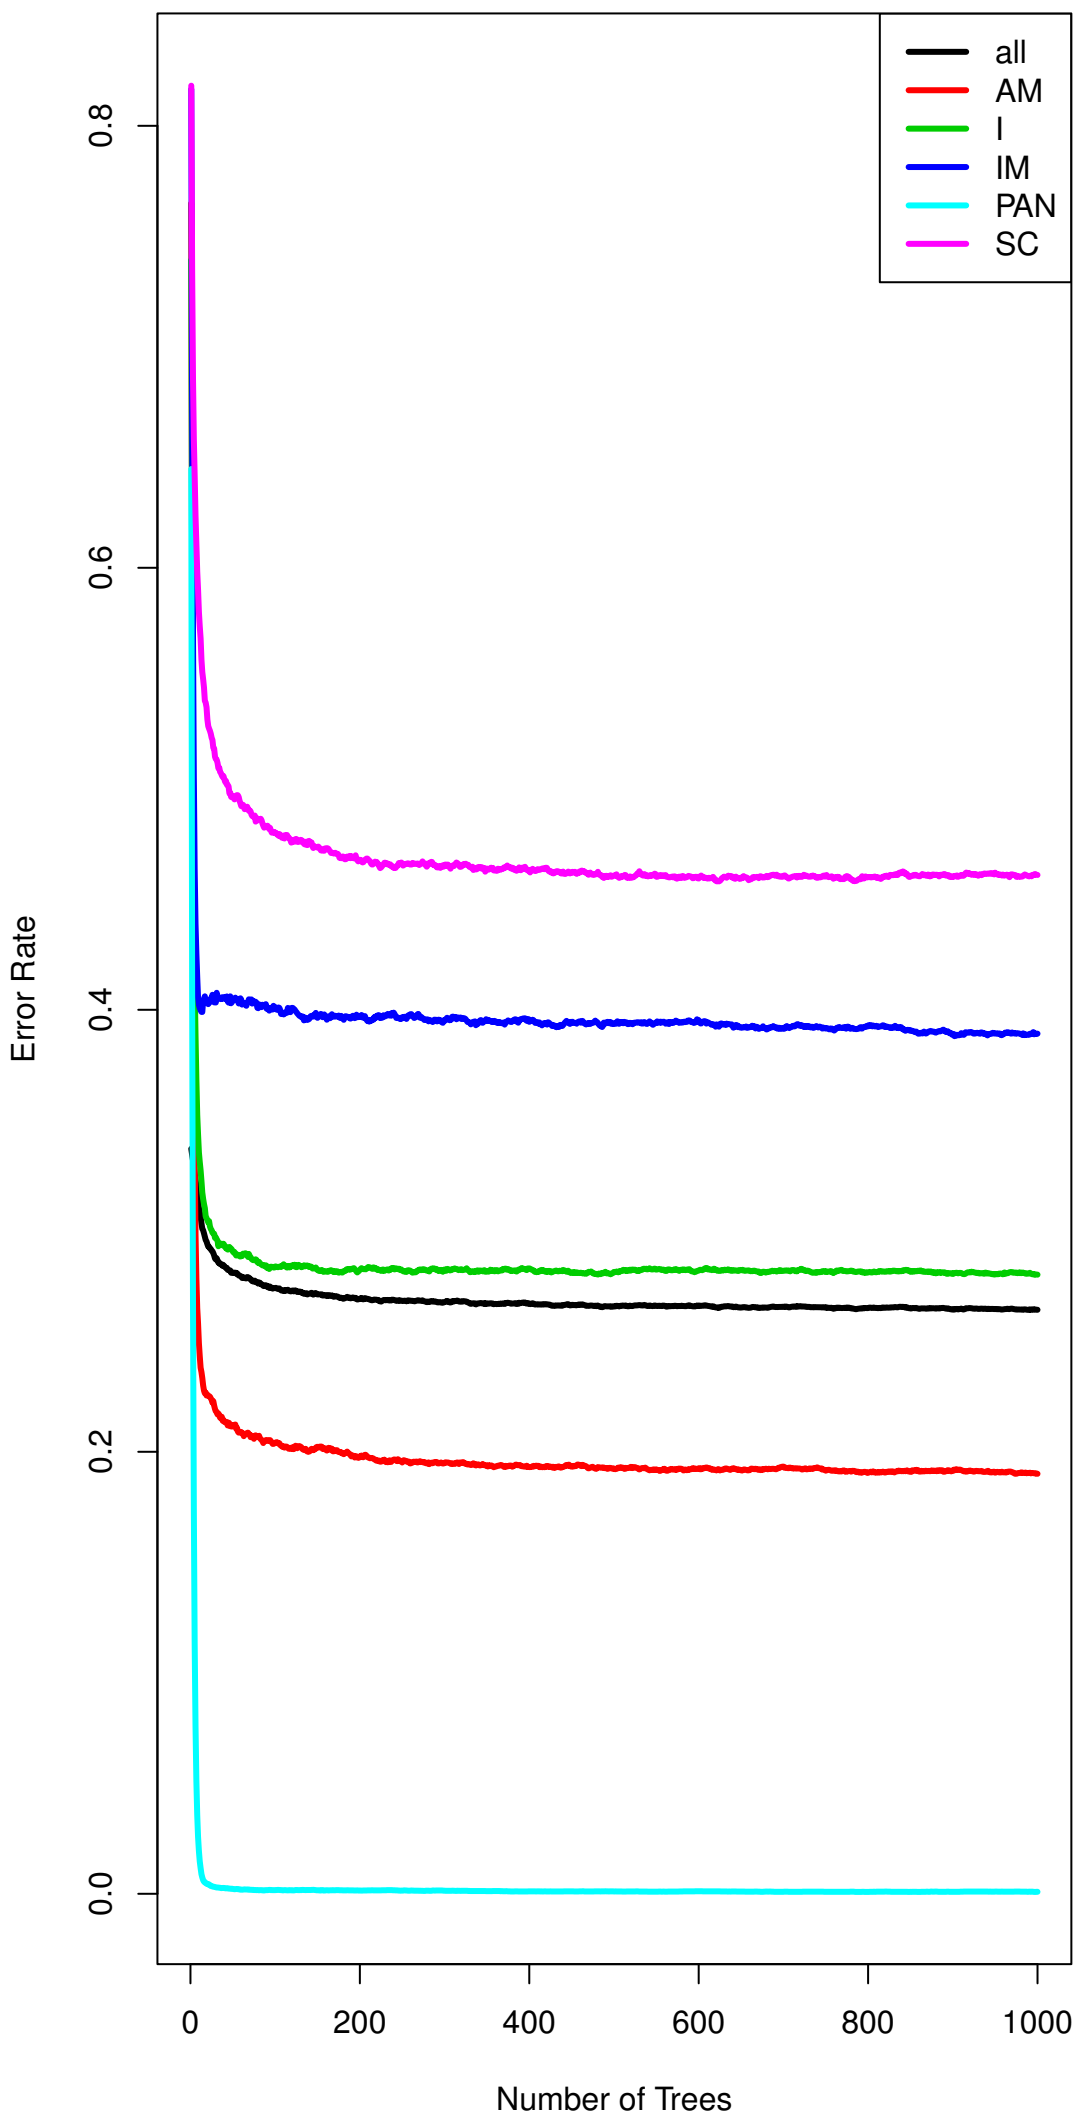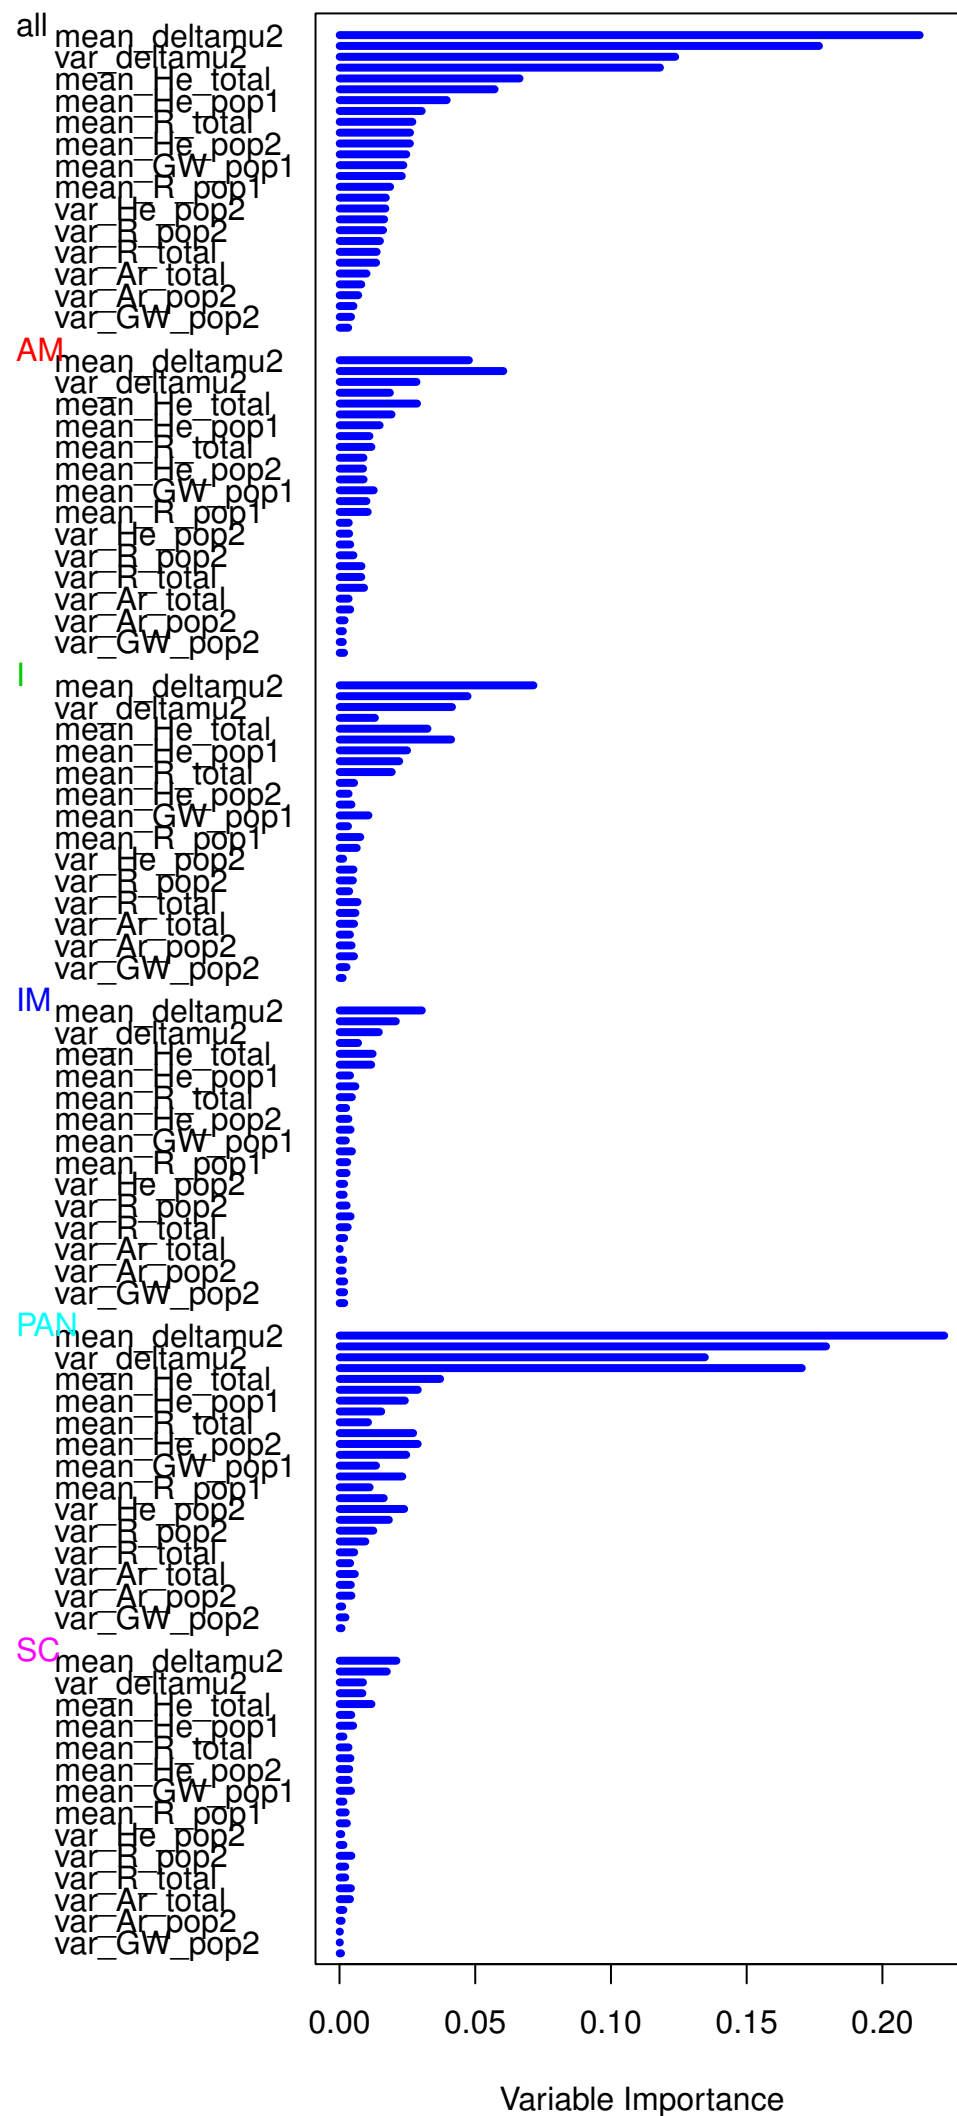

(F)

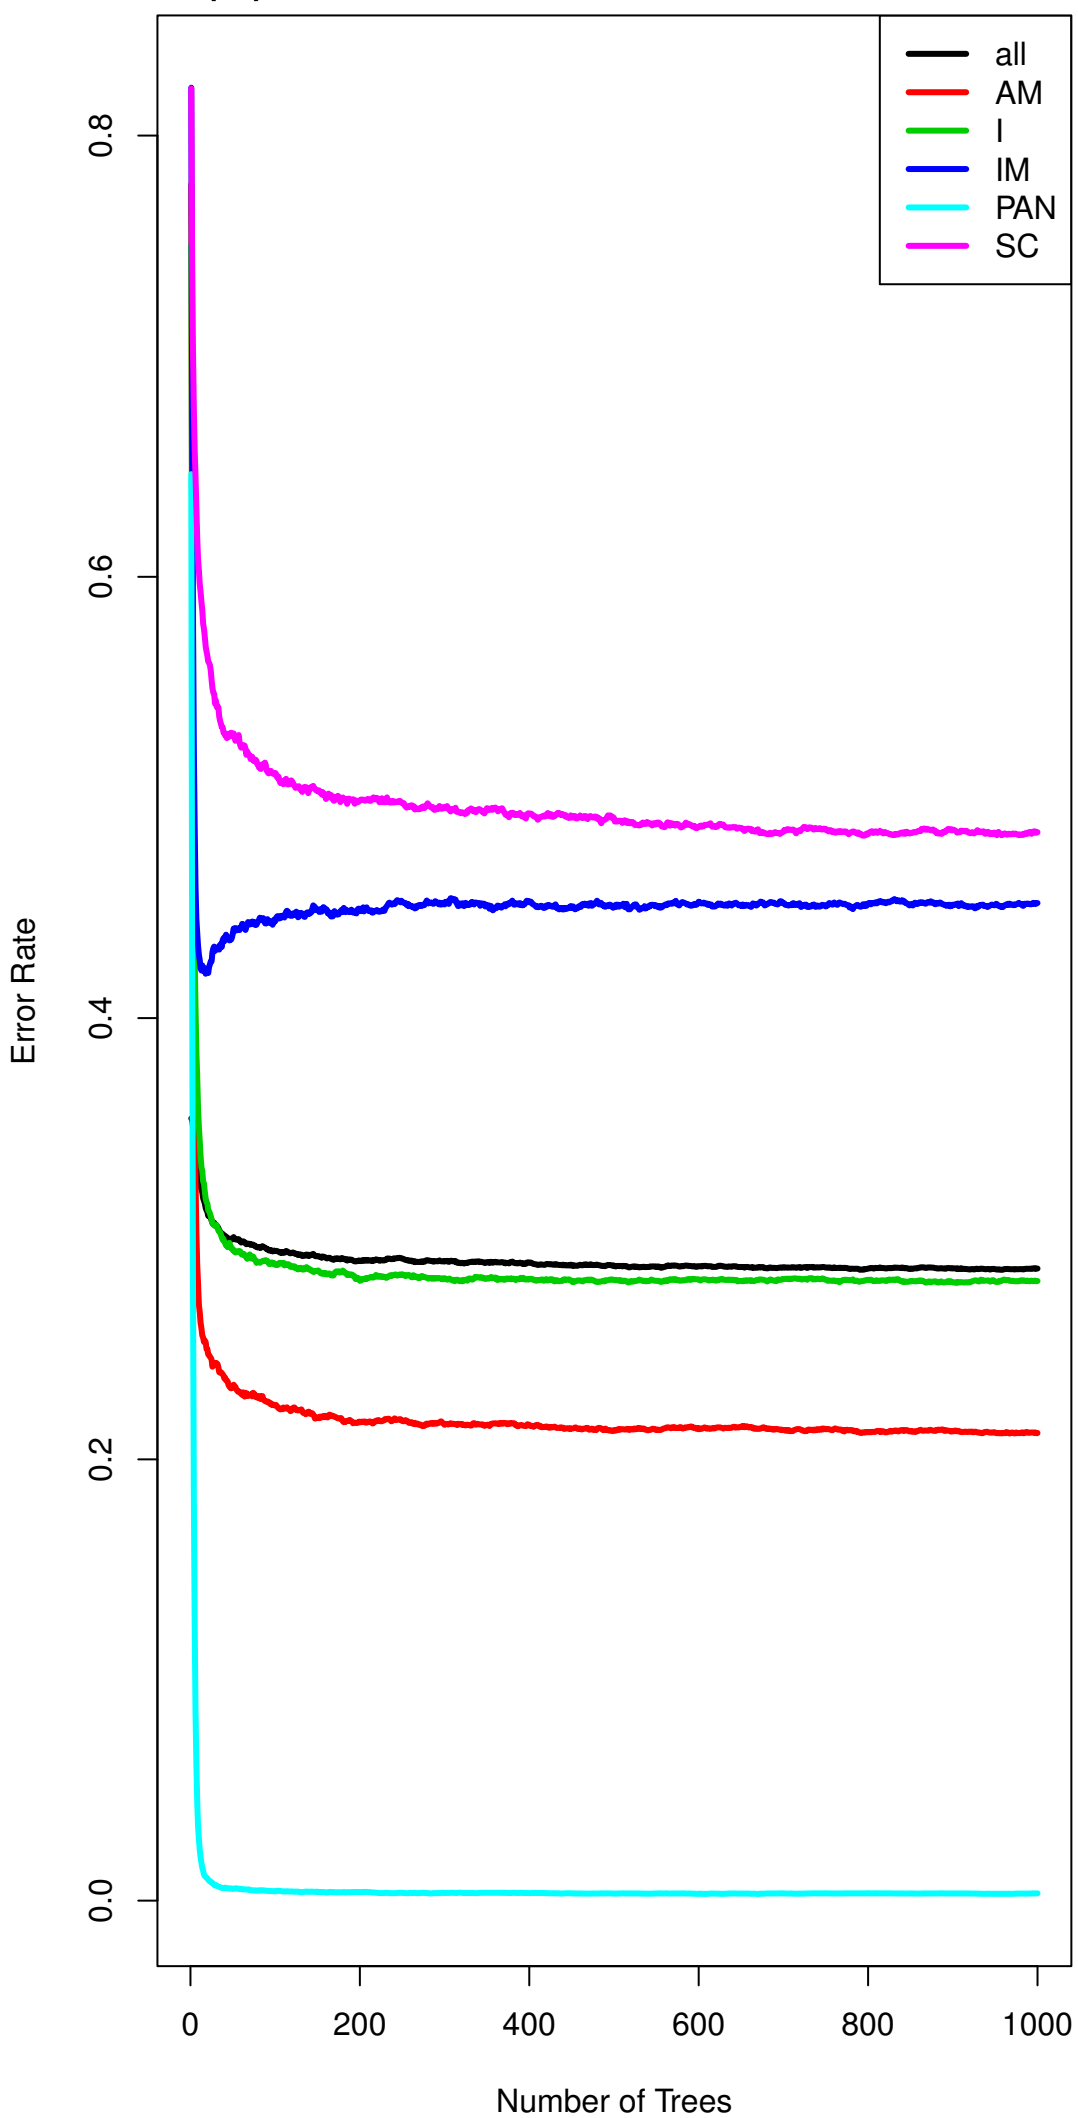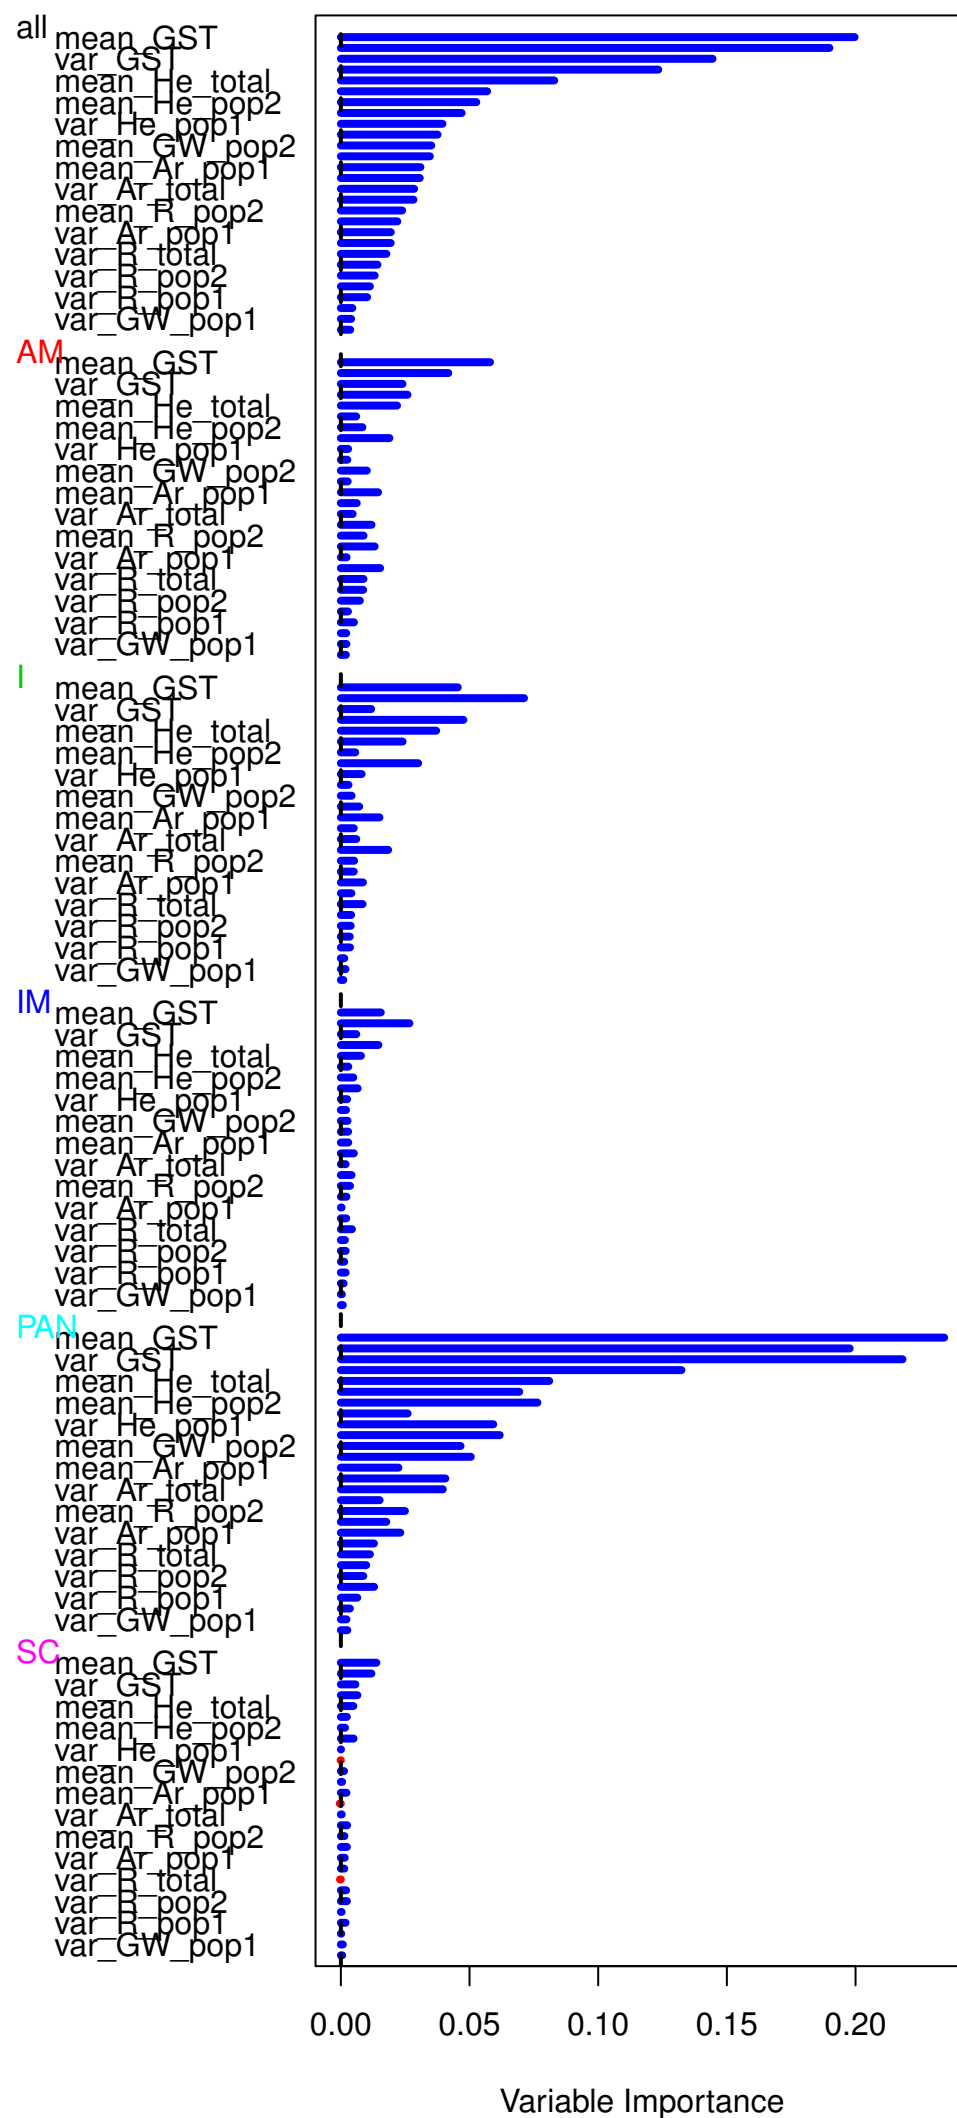

**Figure S2: Prior and Posterior Distribution of parameters estimations in each river under the SC and IM models**

**a) Parameter estimations under scenarios of divergence with gene flow (IM)**

**b) Parameter estimations under scenarios of secondary contact (SC)**

a)

theta1/thetaRef

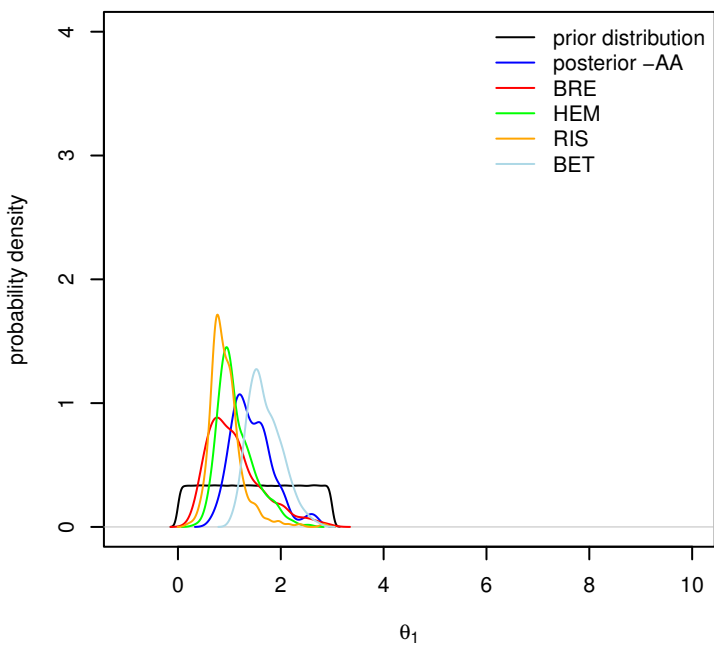

theta2/thetaRef

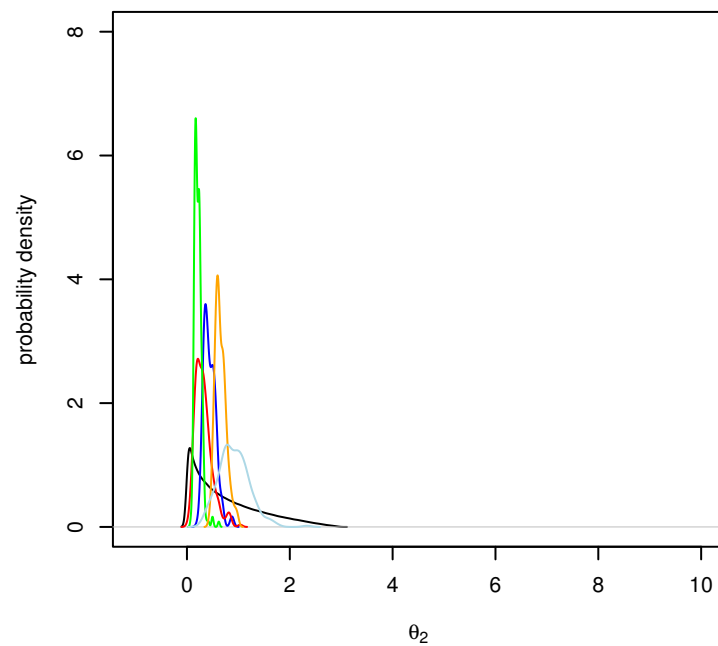

thetaA/thetaRef

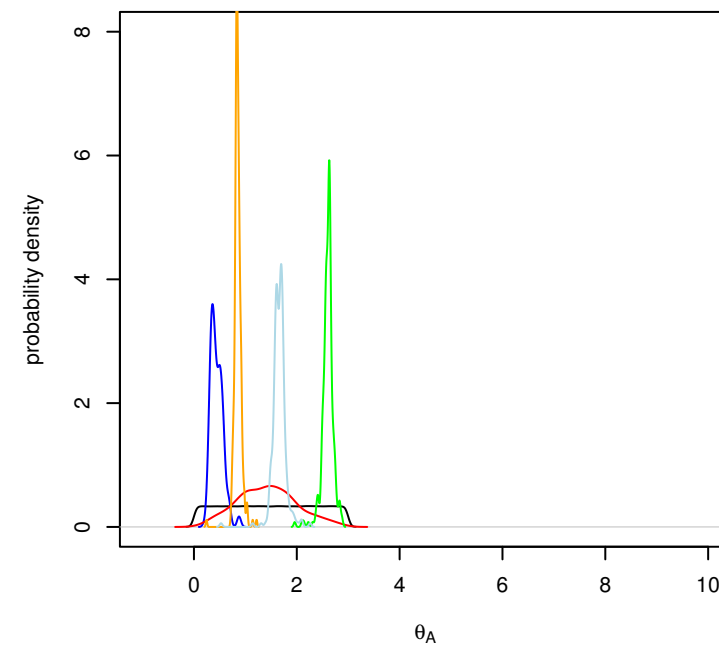

Effective migration rate (from Lp to Lf)

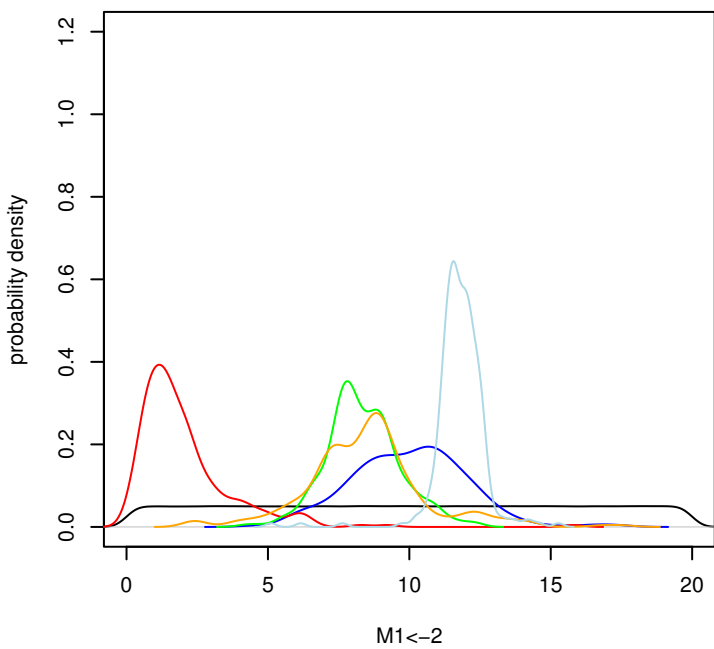

Effective migration rate (from Lf to Lp)

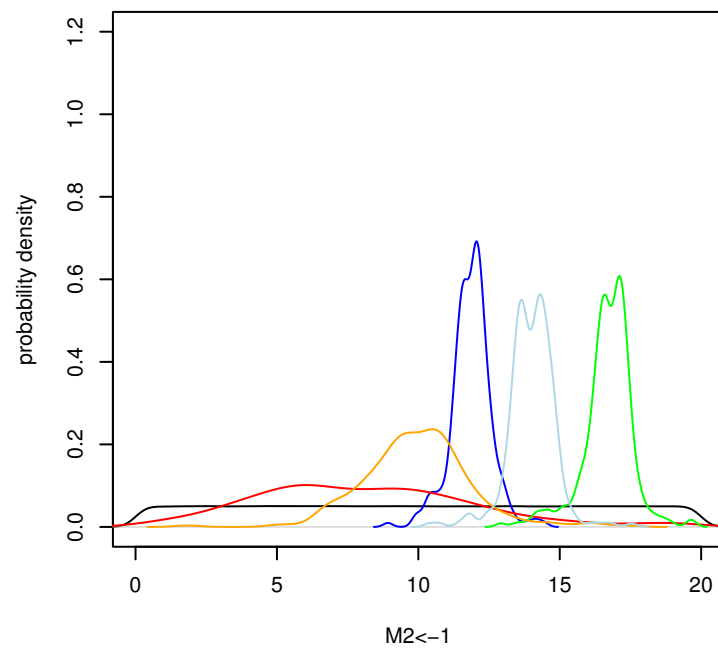

Time Split (4Ngenerations)

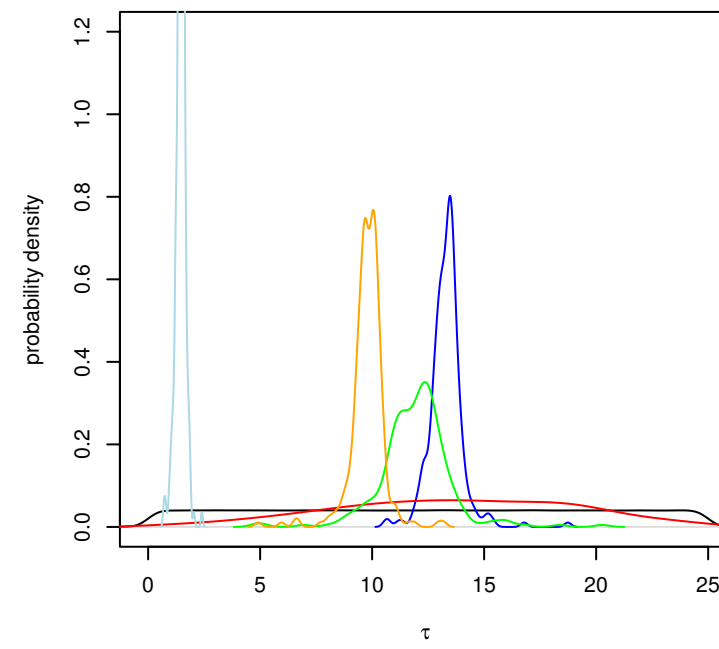

b)

theta1/thetaRef

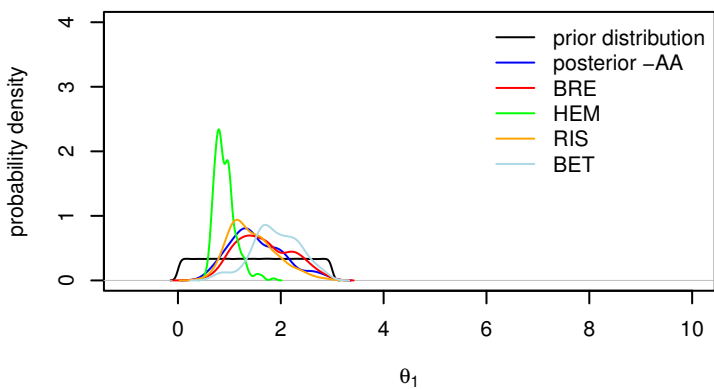

theta2/thetaRef

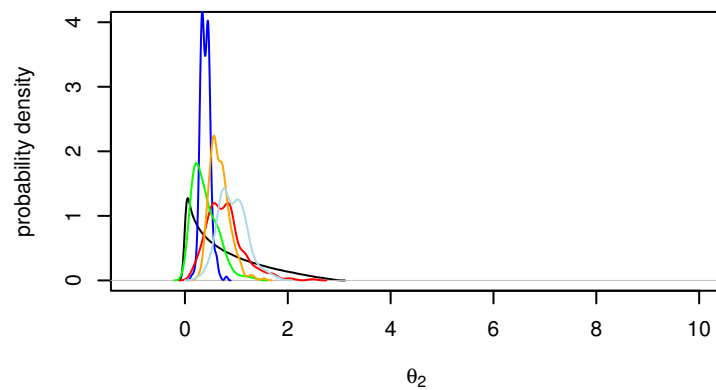

thetaA/thetaRef

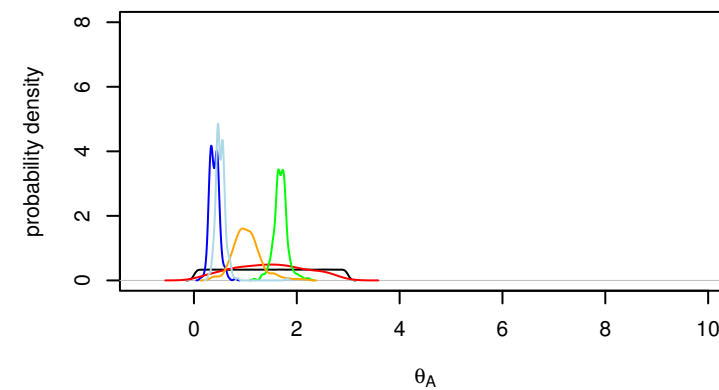

Effective migration rate (from Lp to Lf)

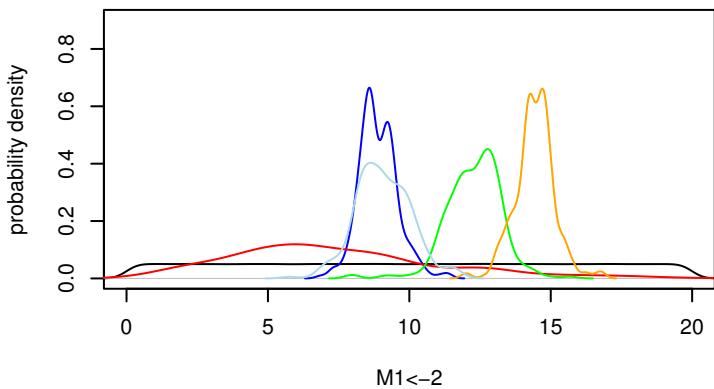

Effective migration rate (from Lf to Lp)

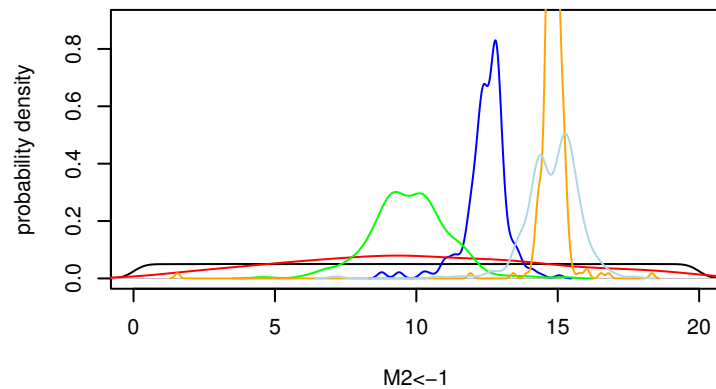

Time Secondary Contact (4Ngenerations)

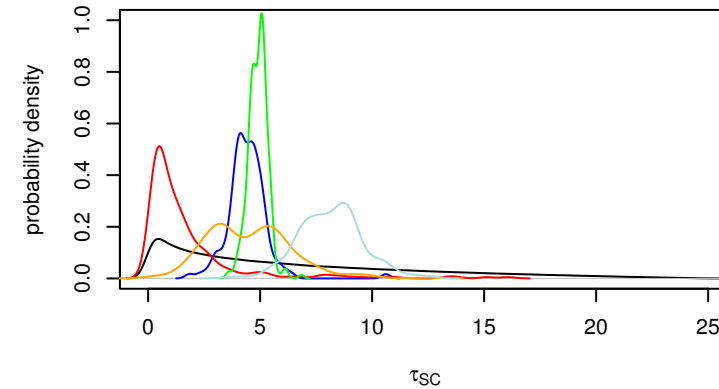

Divergence time (4Ngenerations)

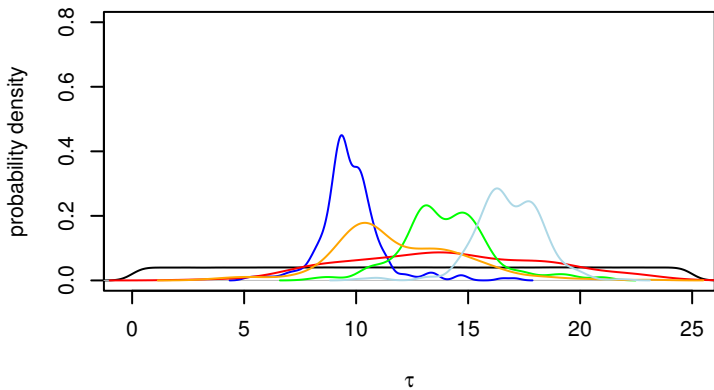



**Figure S2:** Distribution of summary statistics obtained from the posterior predictive check. Statistics obtained after 10 000 simulations based on posterior distributions. Each page corresponds to a different river and a different model

(A) AA – IM

(B) BET – IM

(C) BRE – IM

(D) HEM – IM

(E) RIS – IM

(F) AA – SC

(G) BET – SC

(H) BRE – SC

(I) HEM – SC

(J) RIS – SC

(K) OIR – PAN

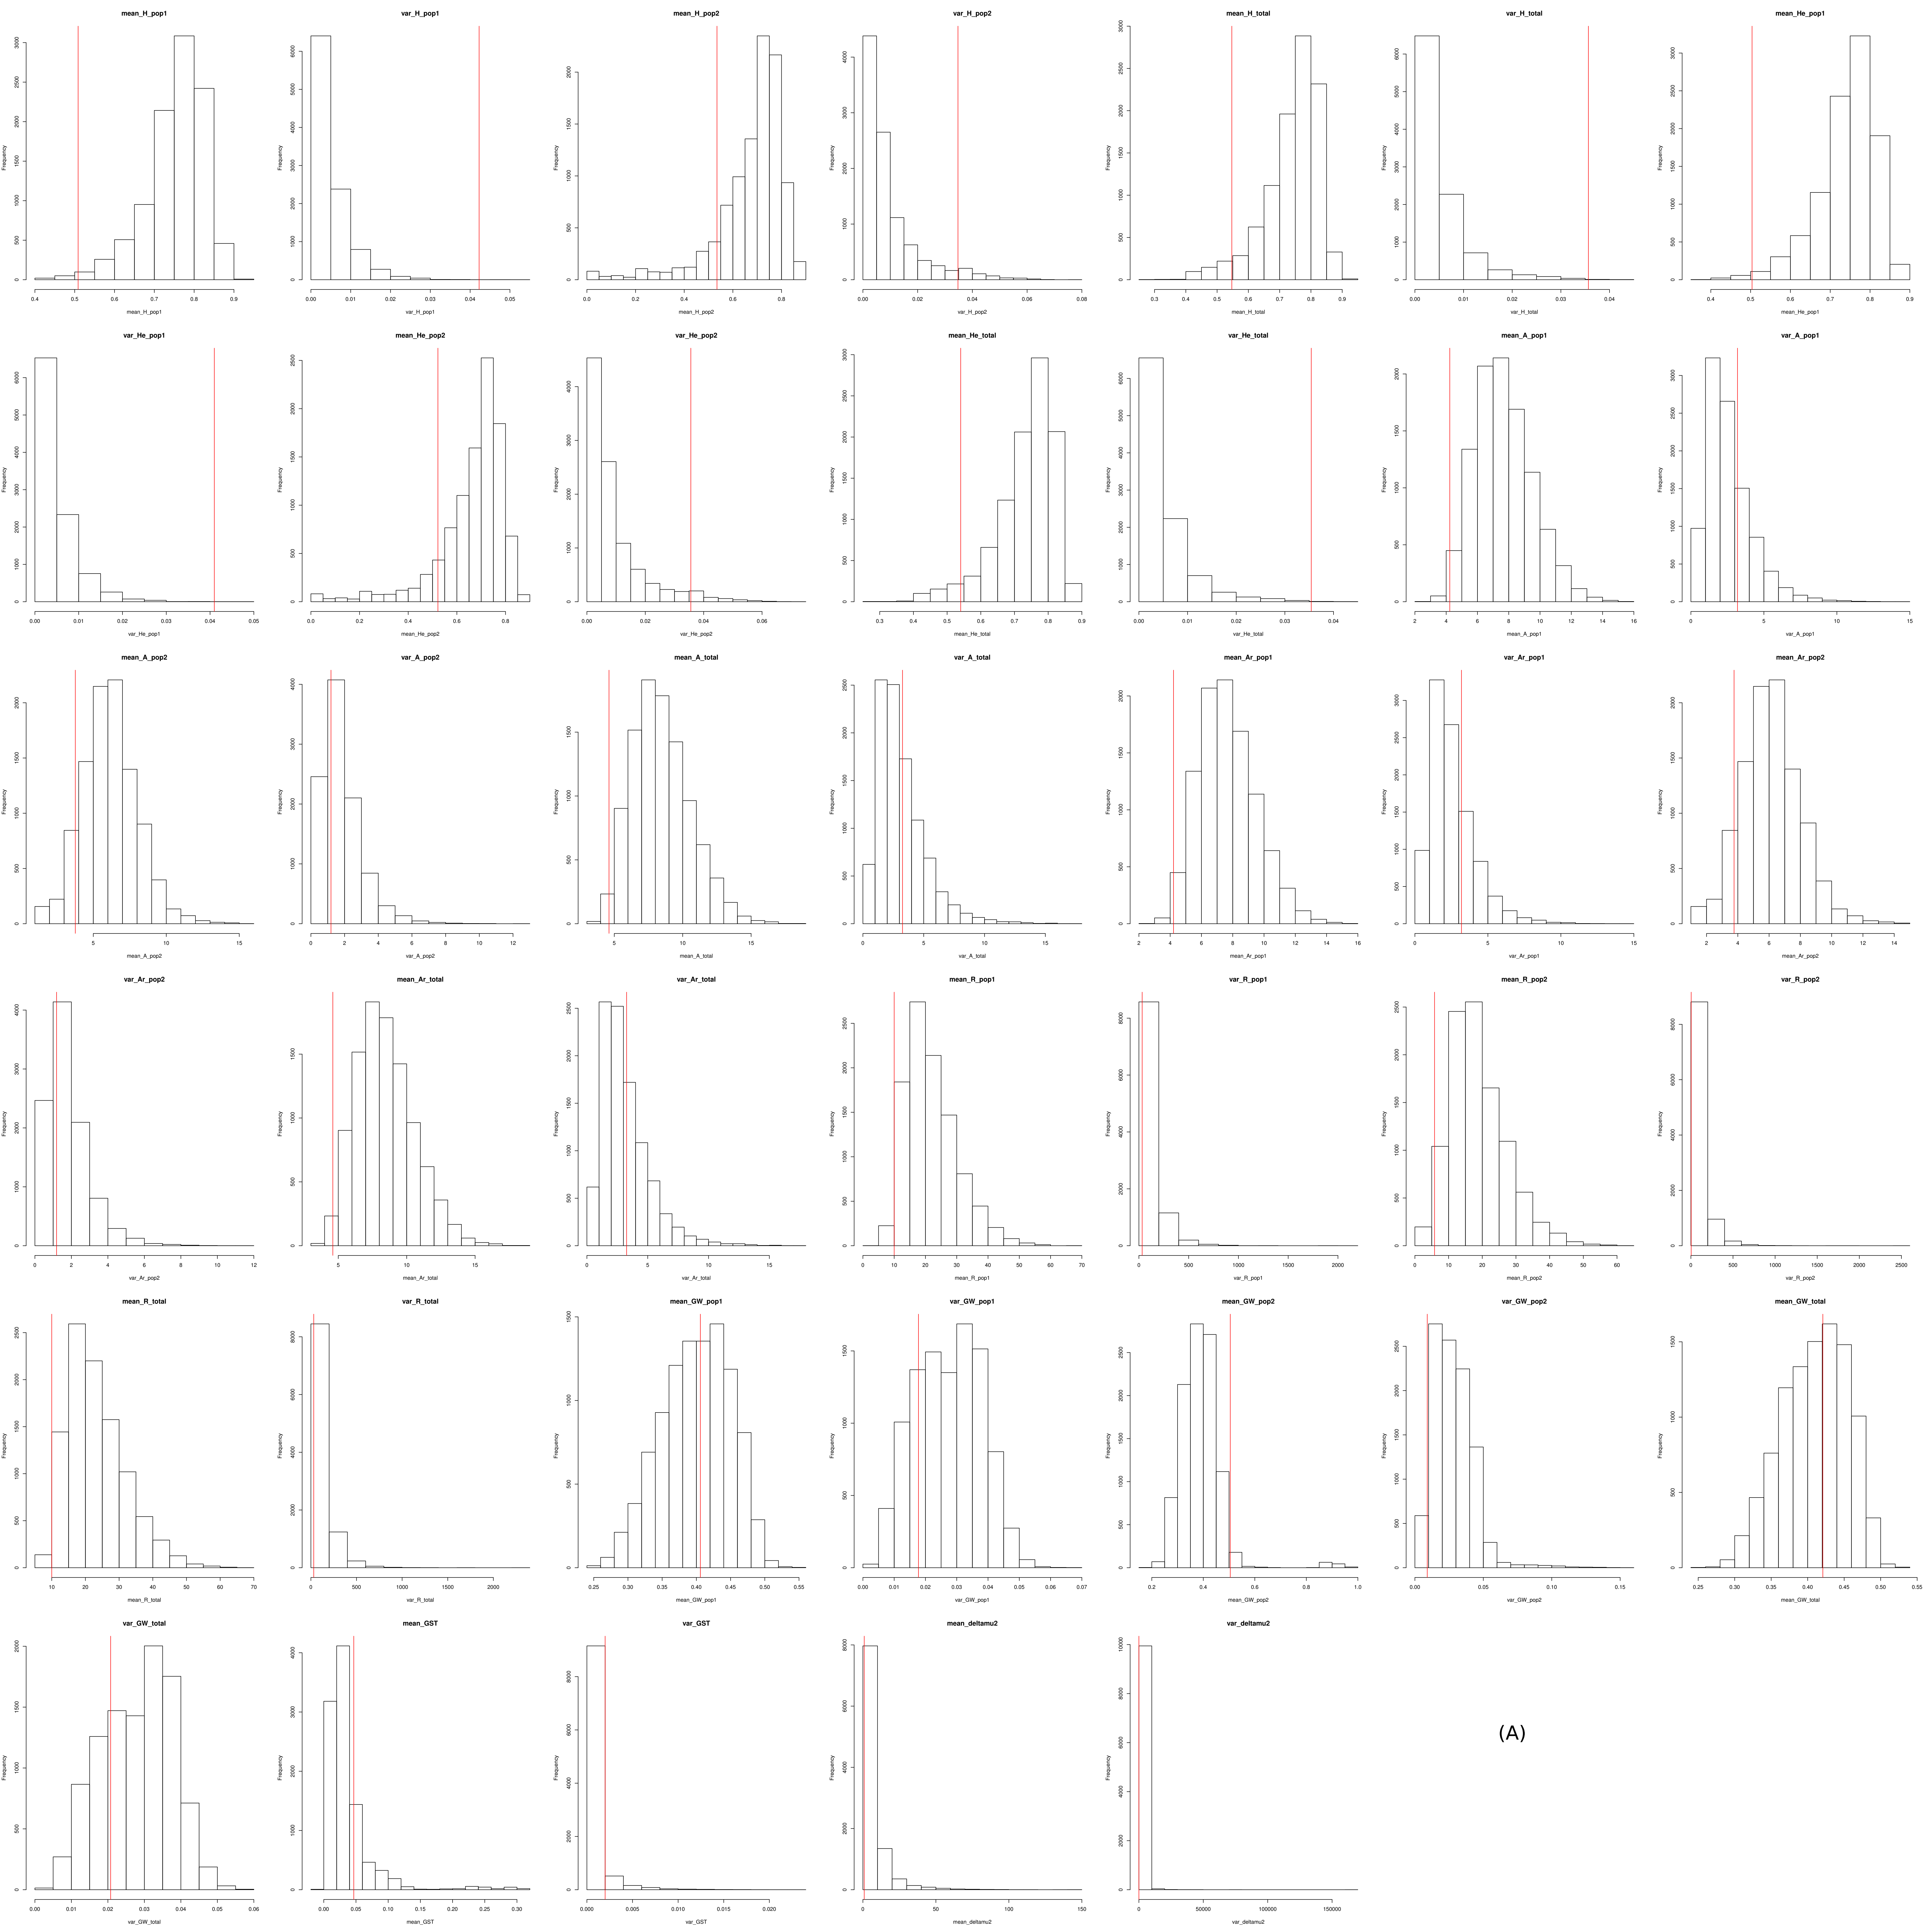

(A)

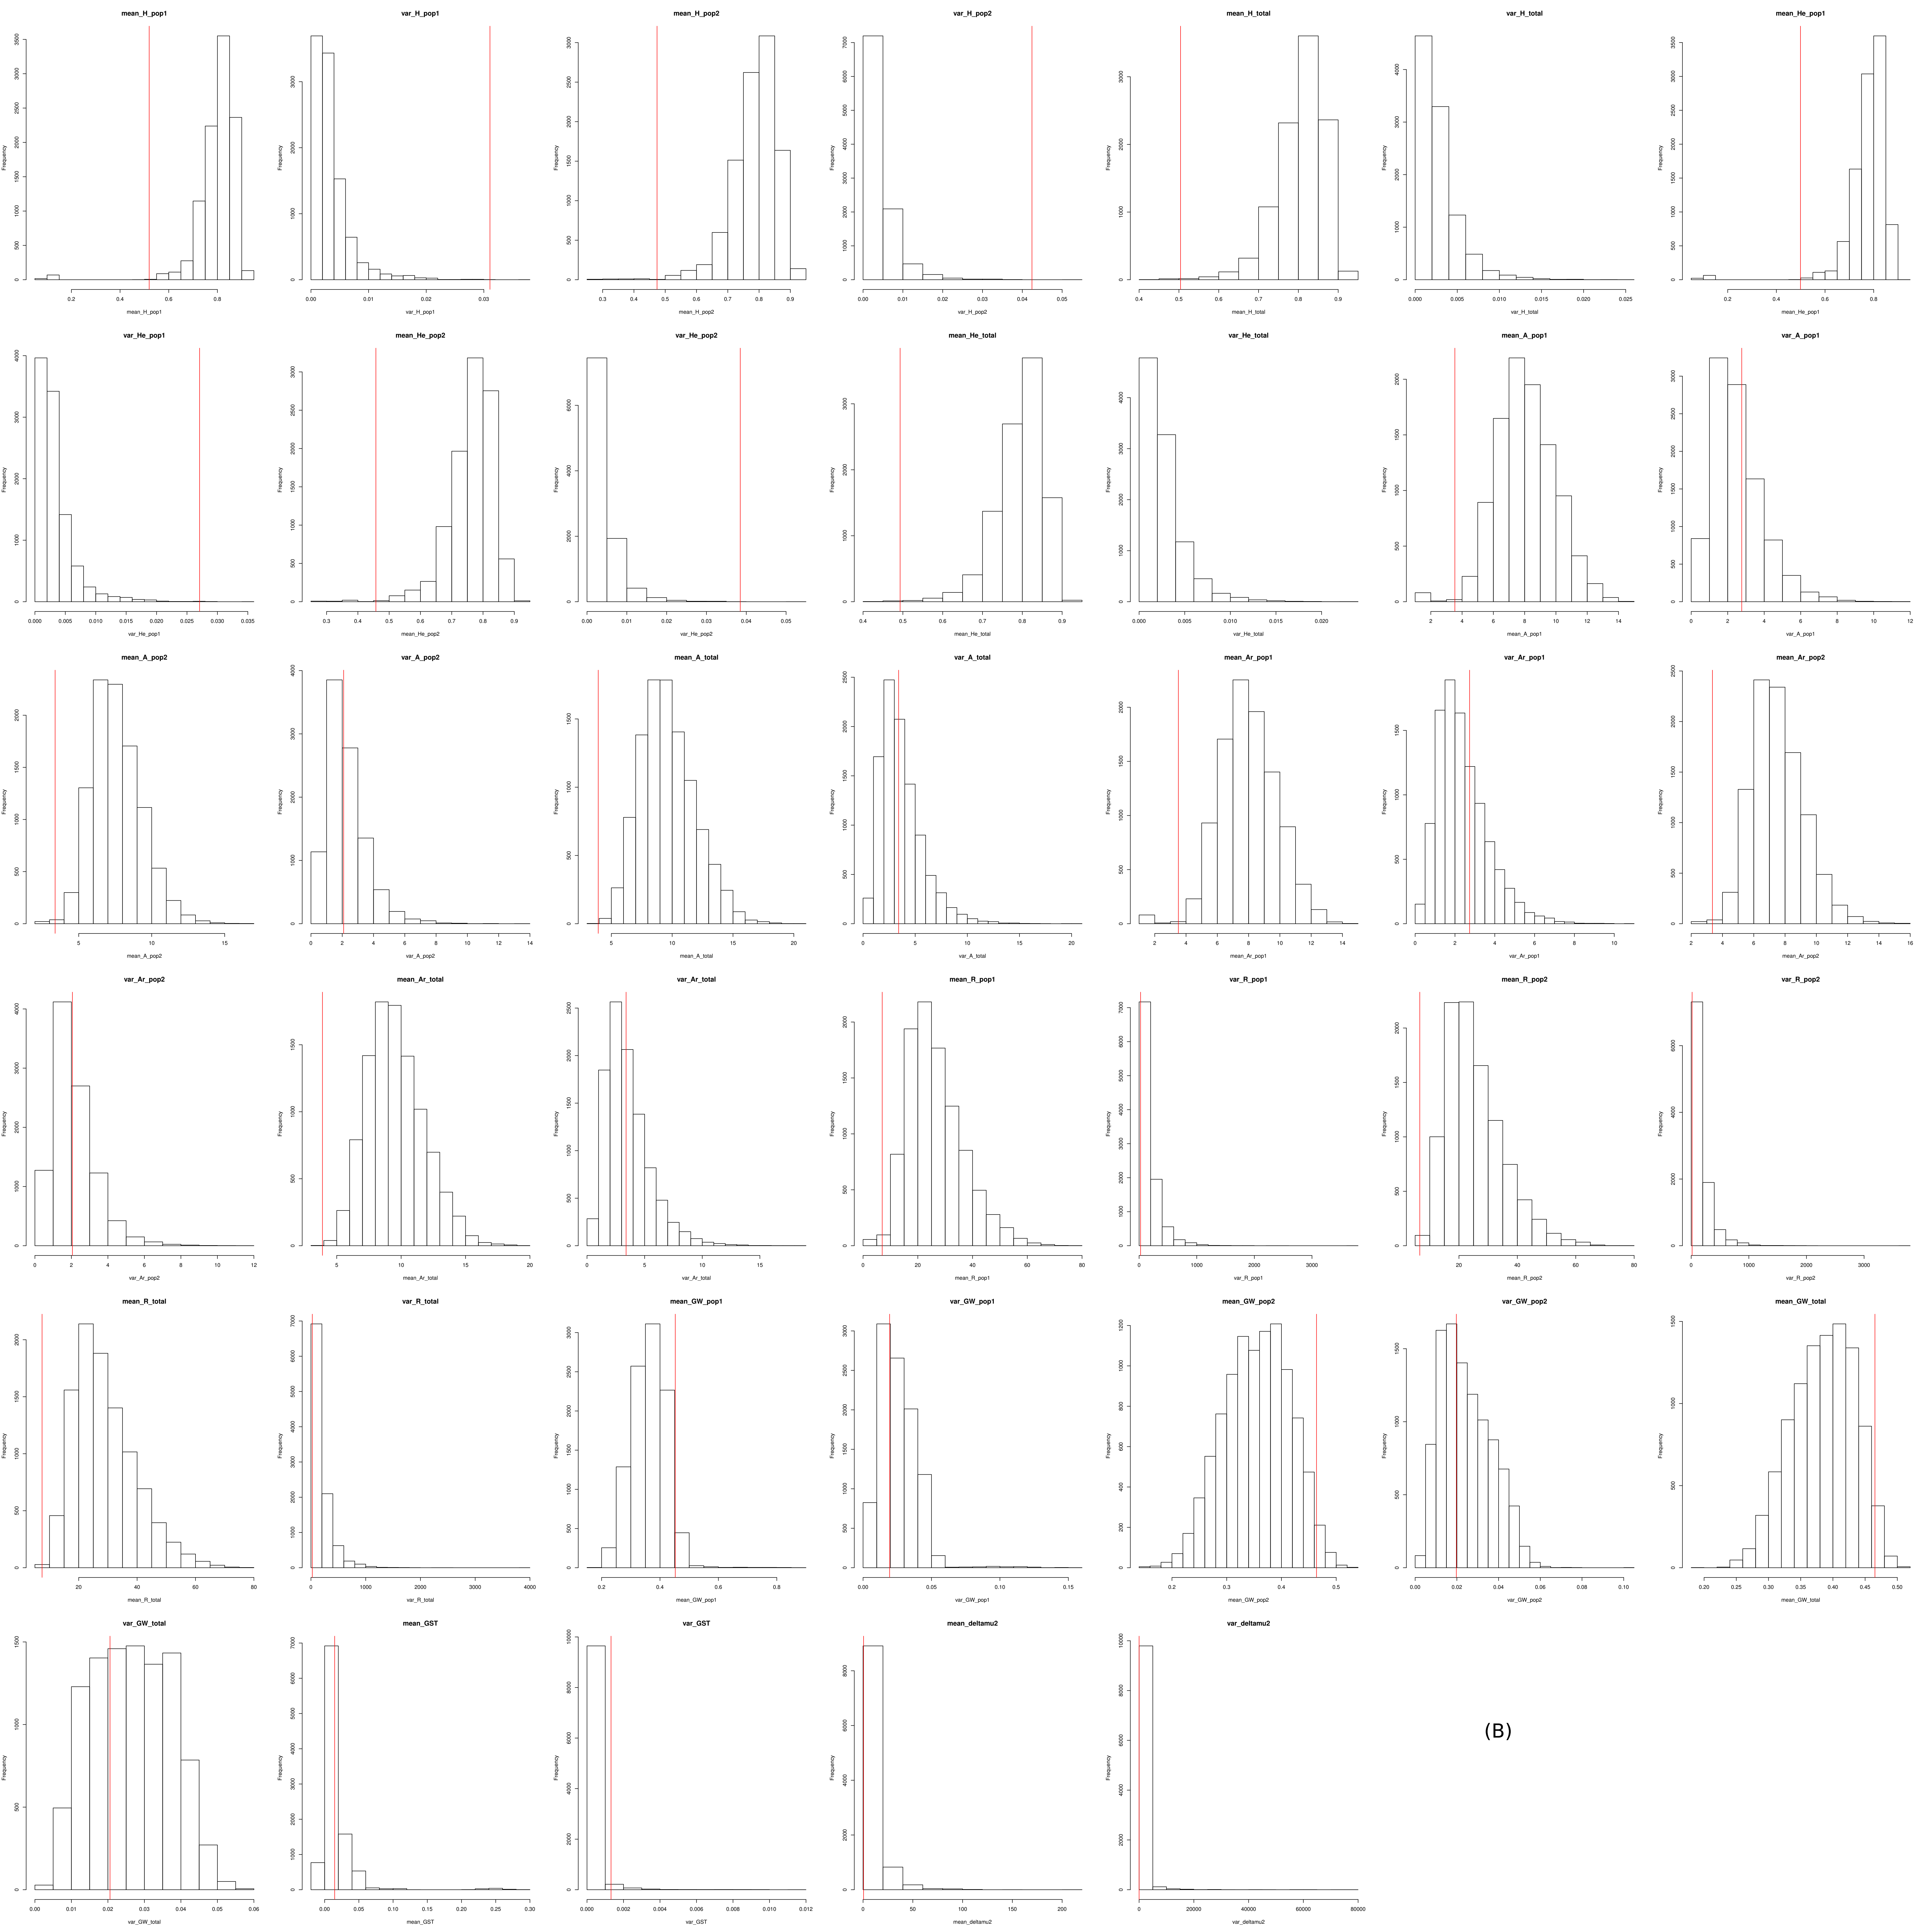

(B)

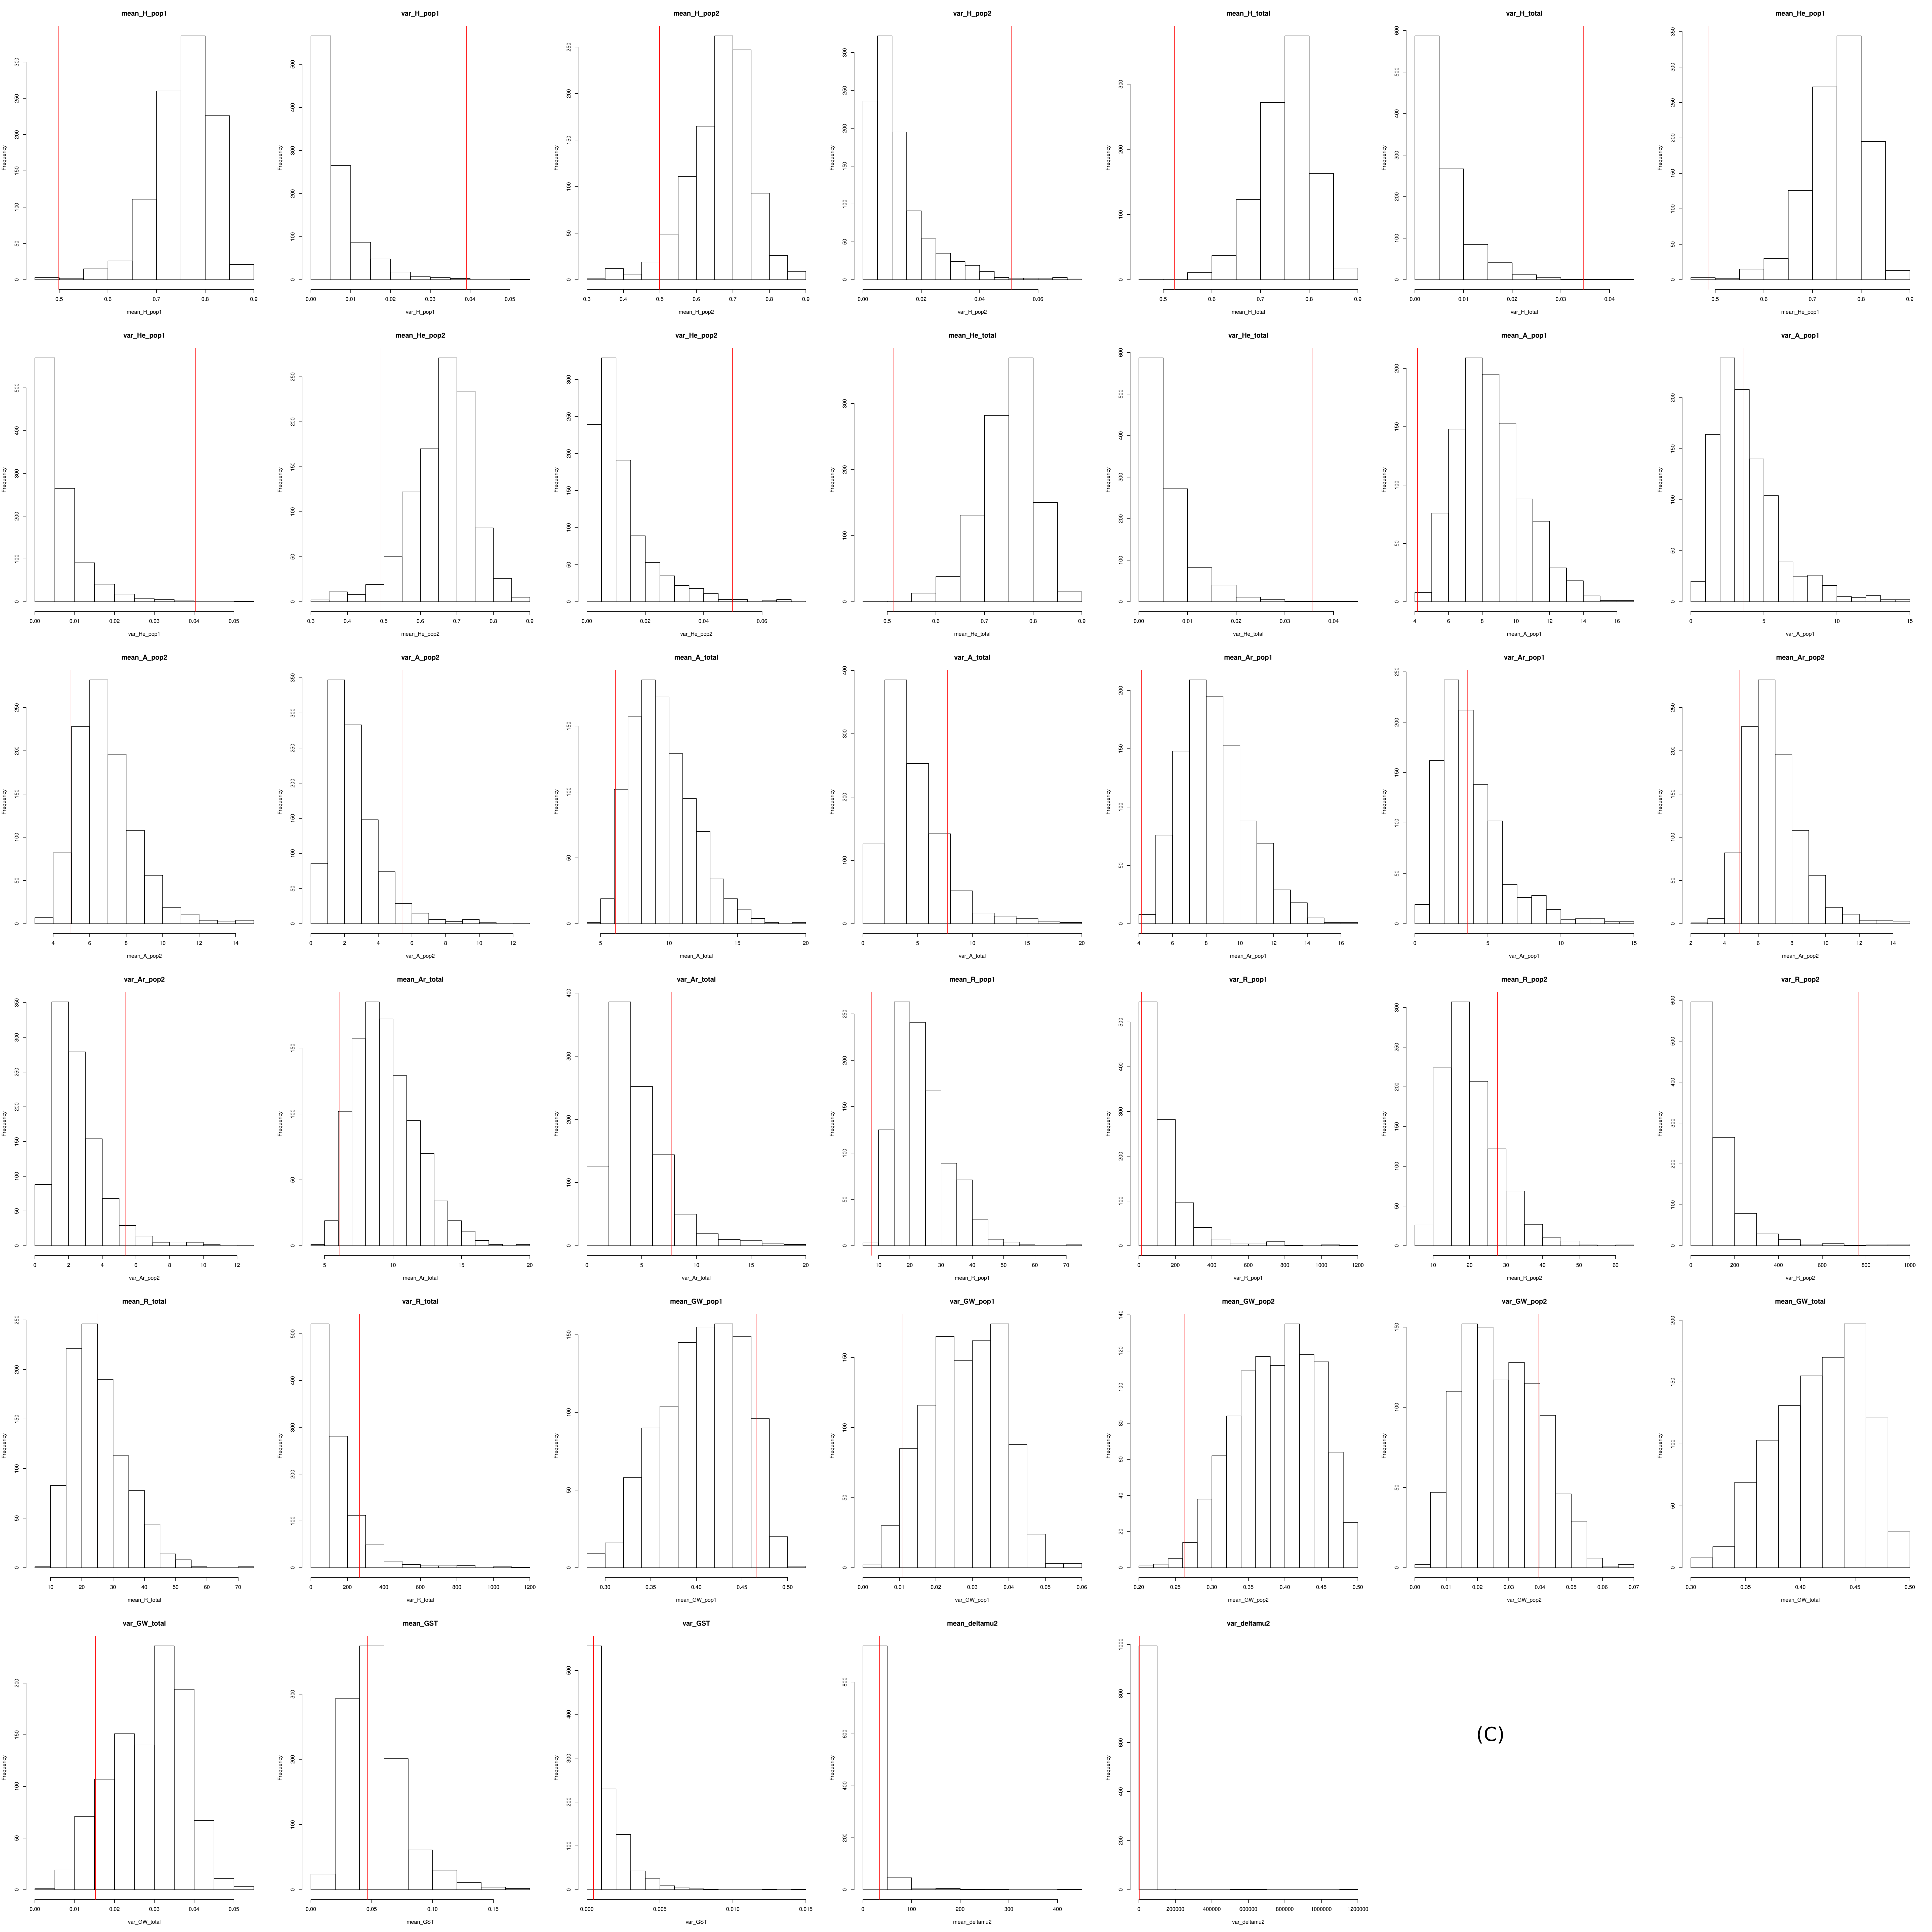

(C)

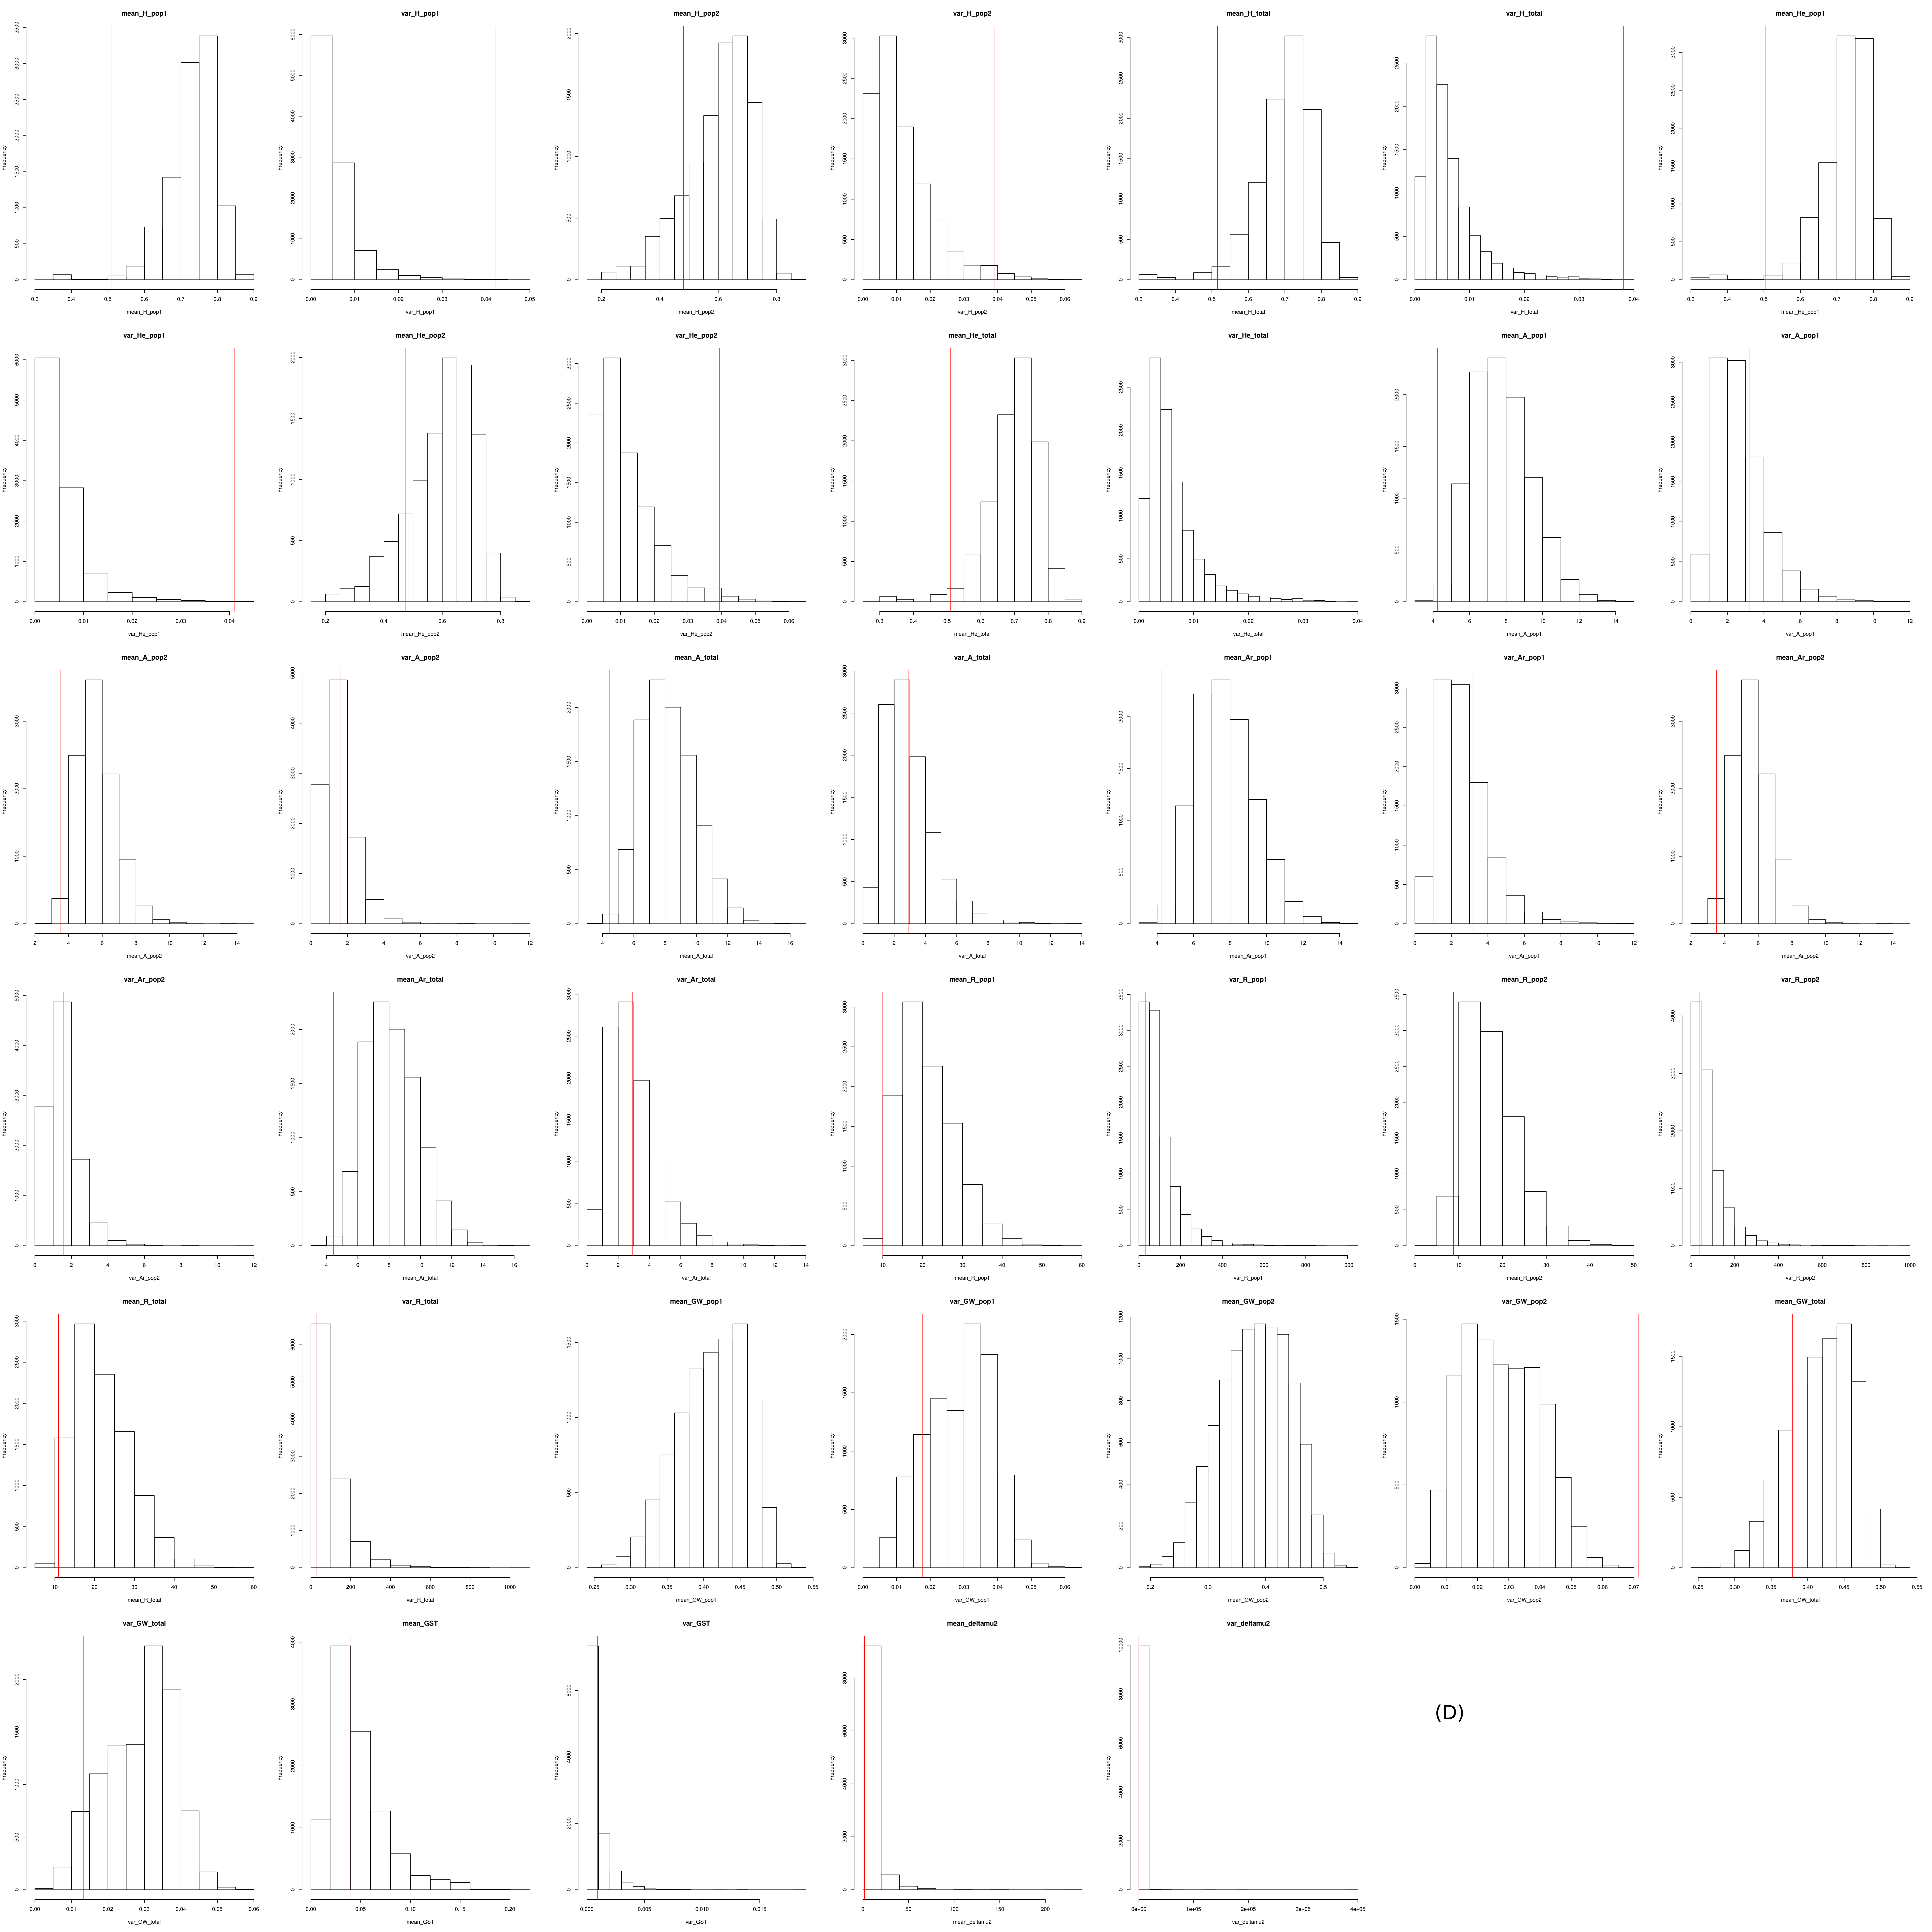

(D)



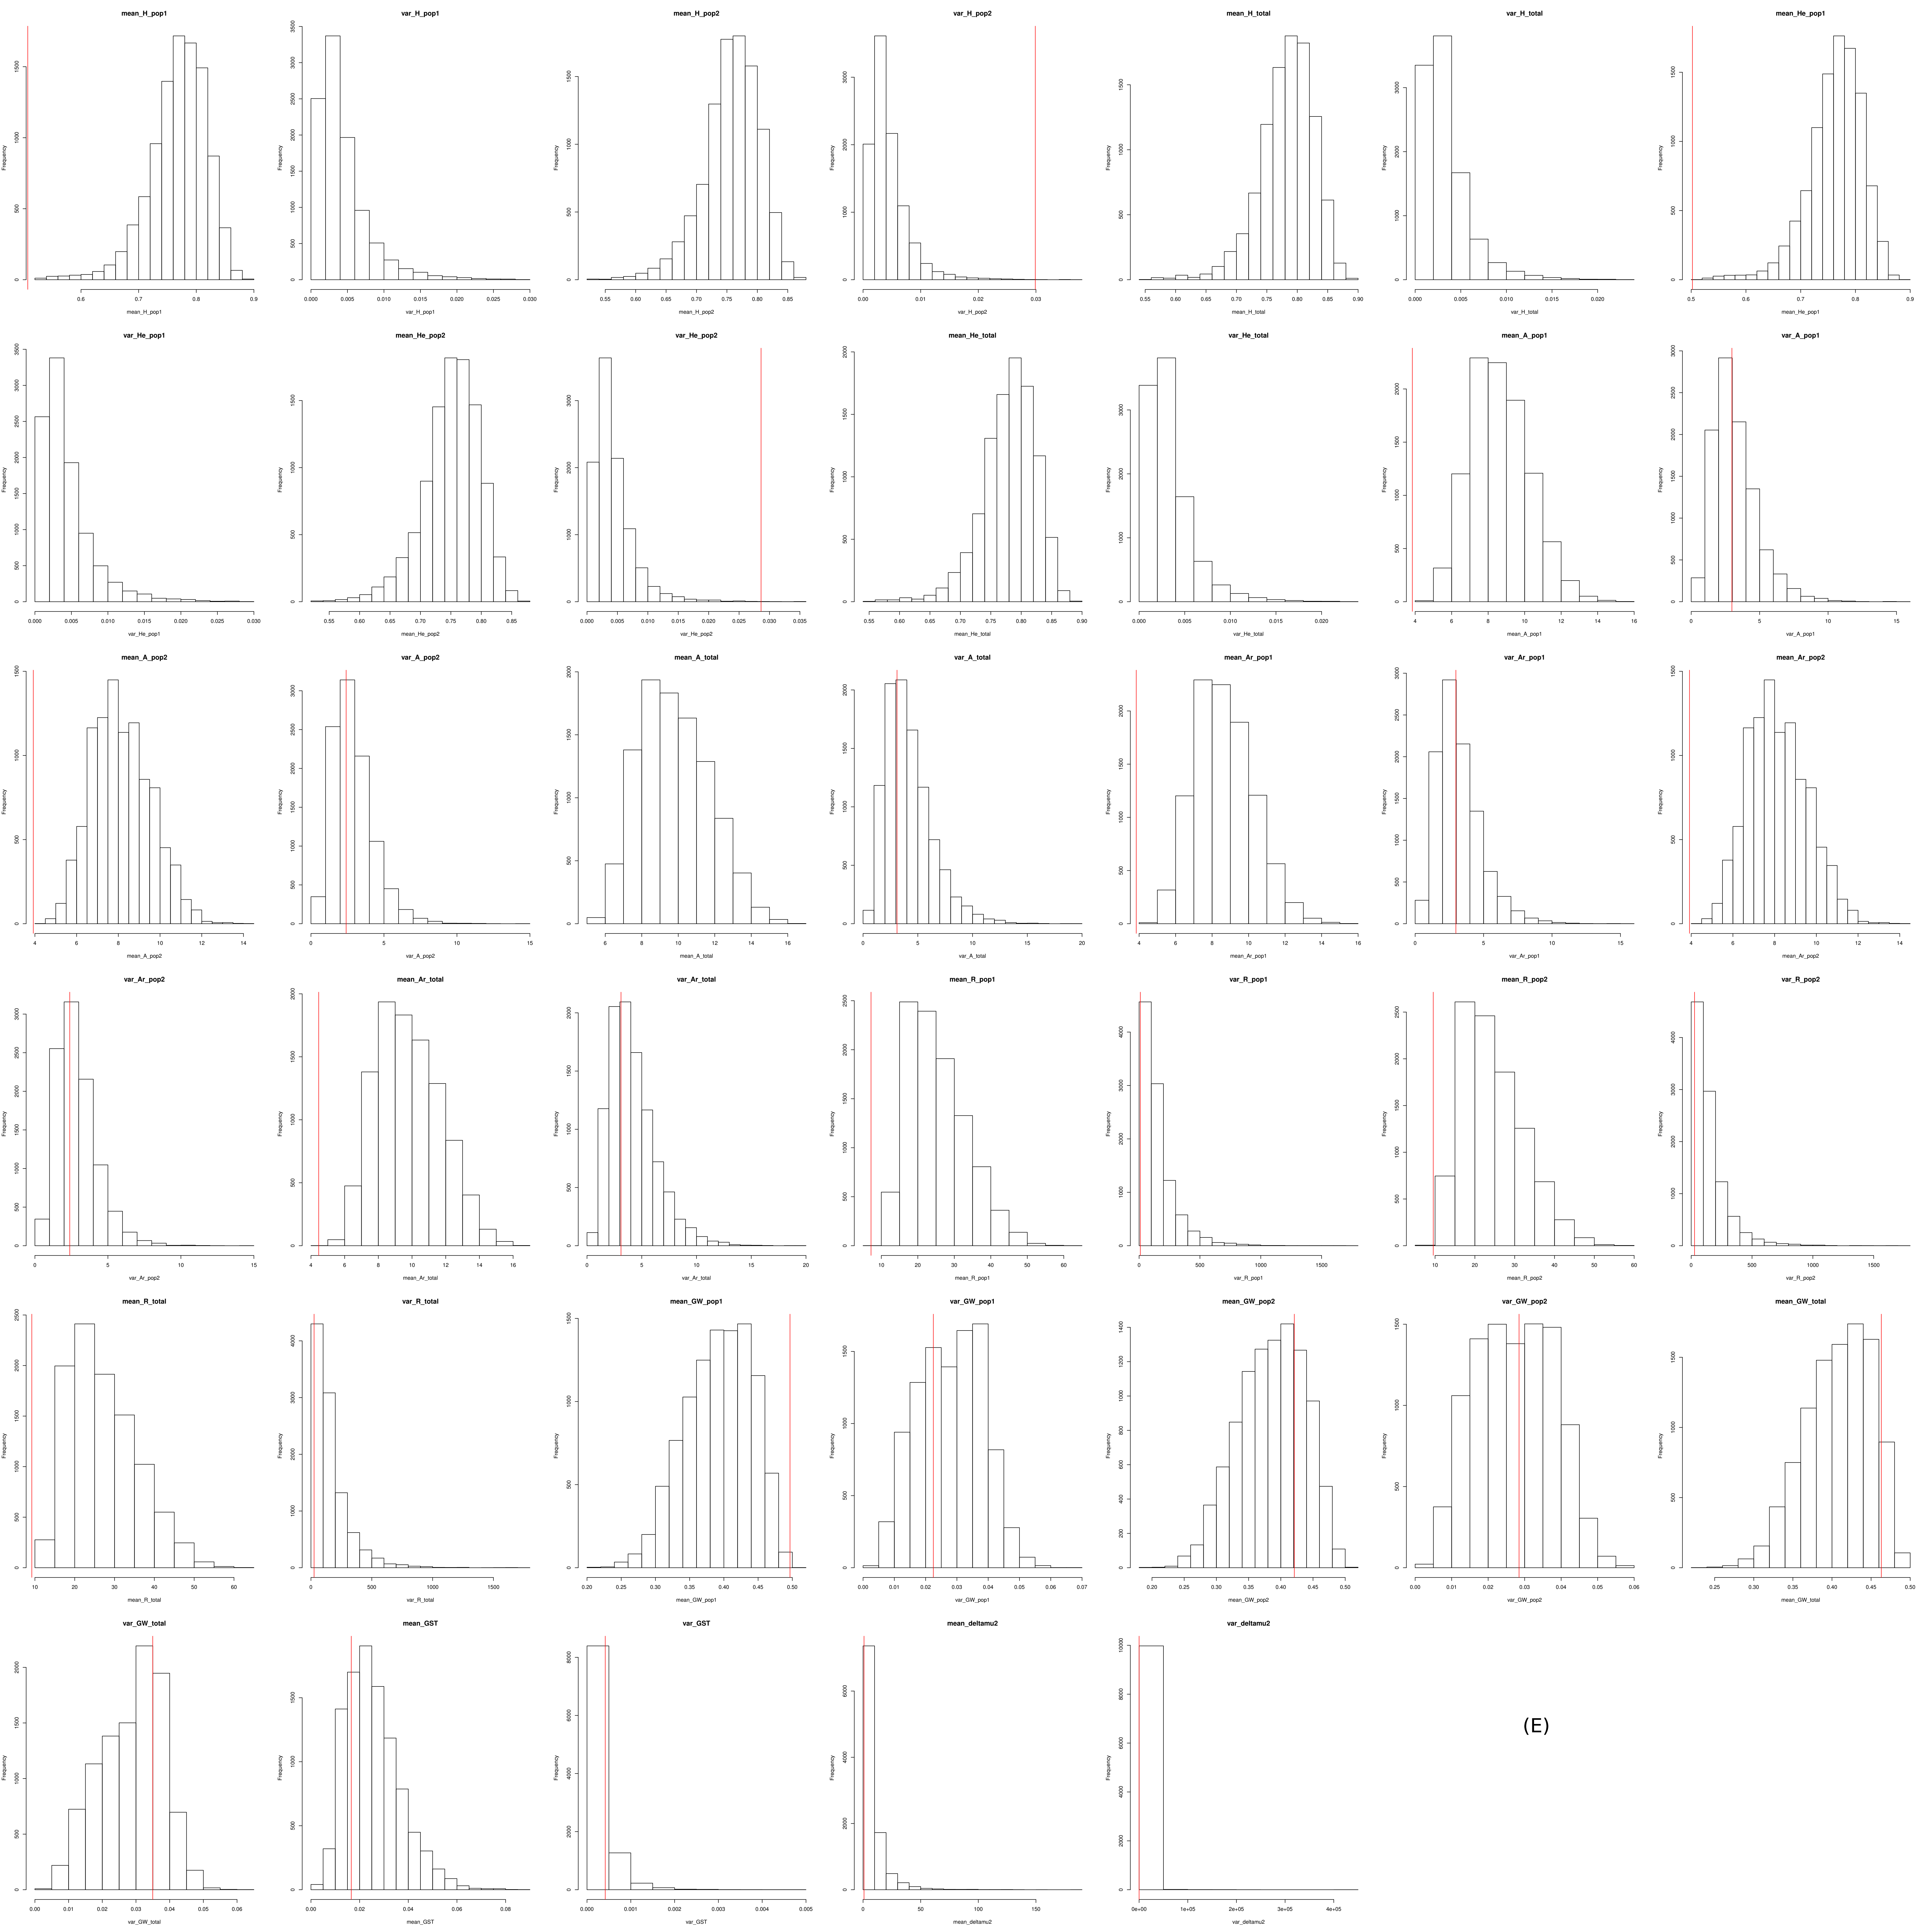

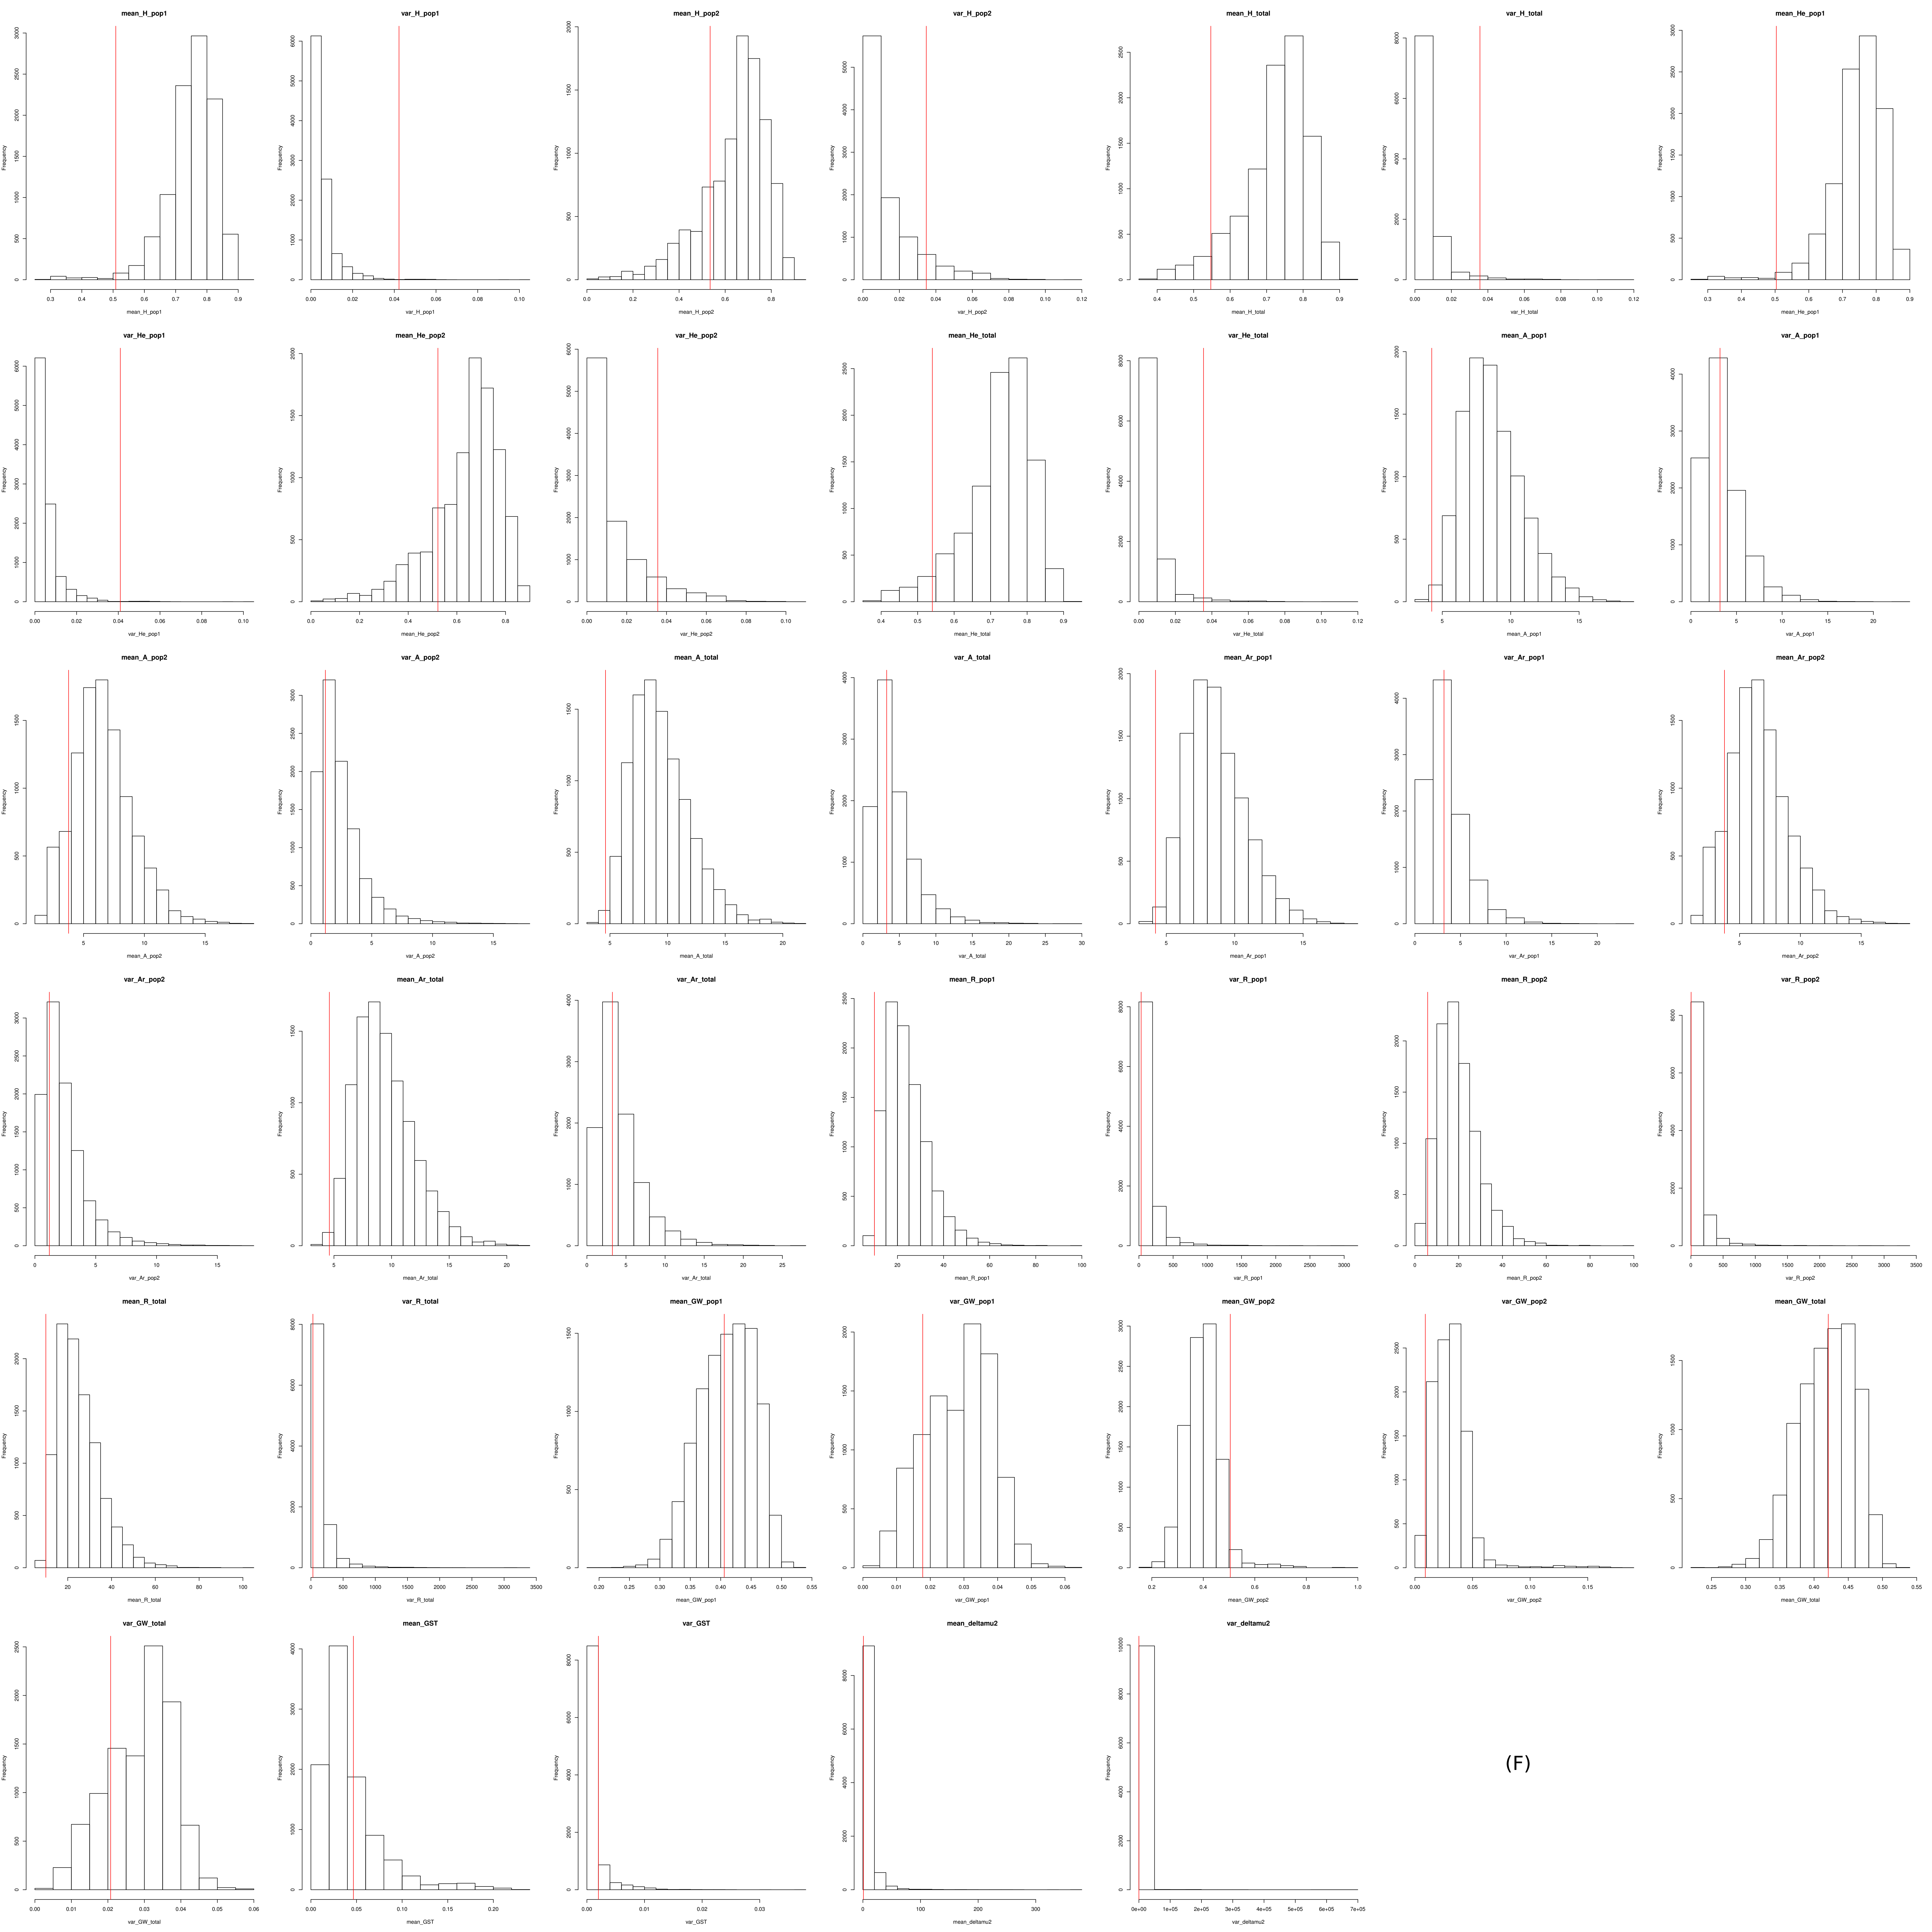

(F)

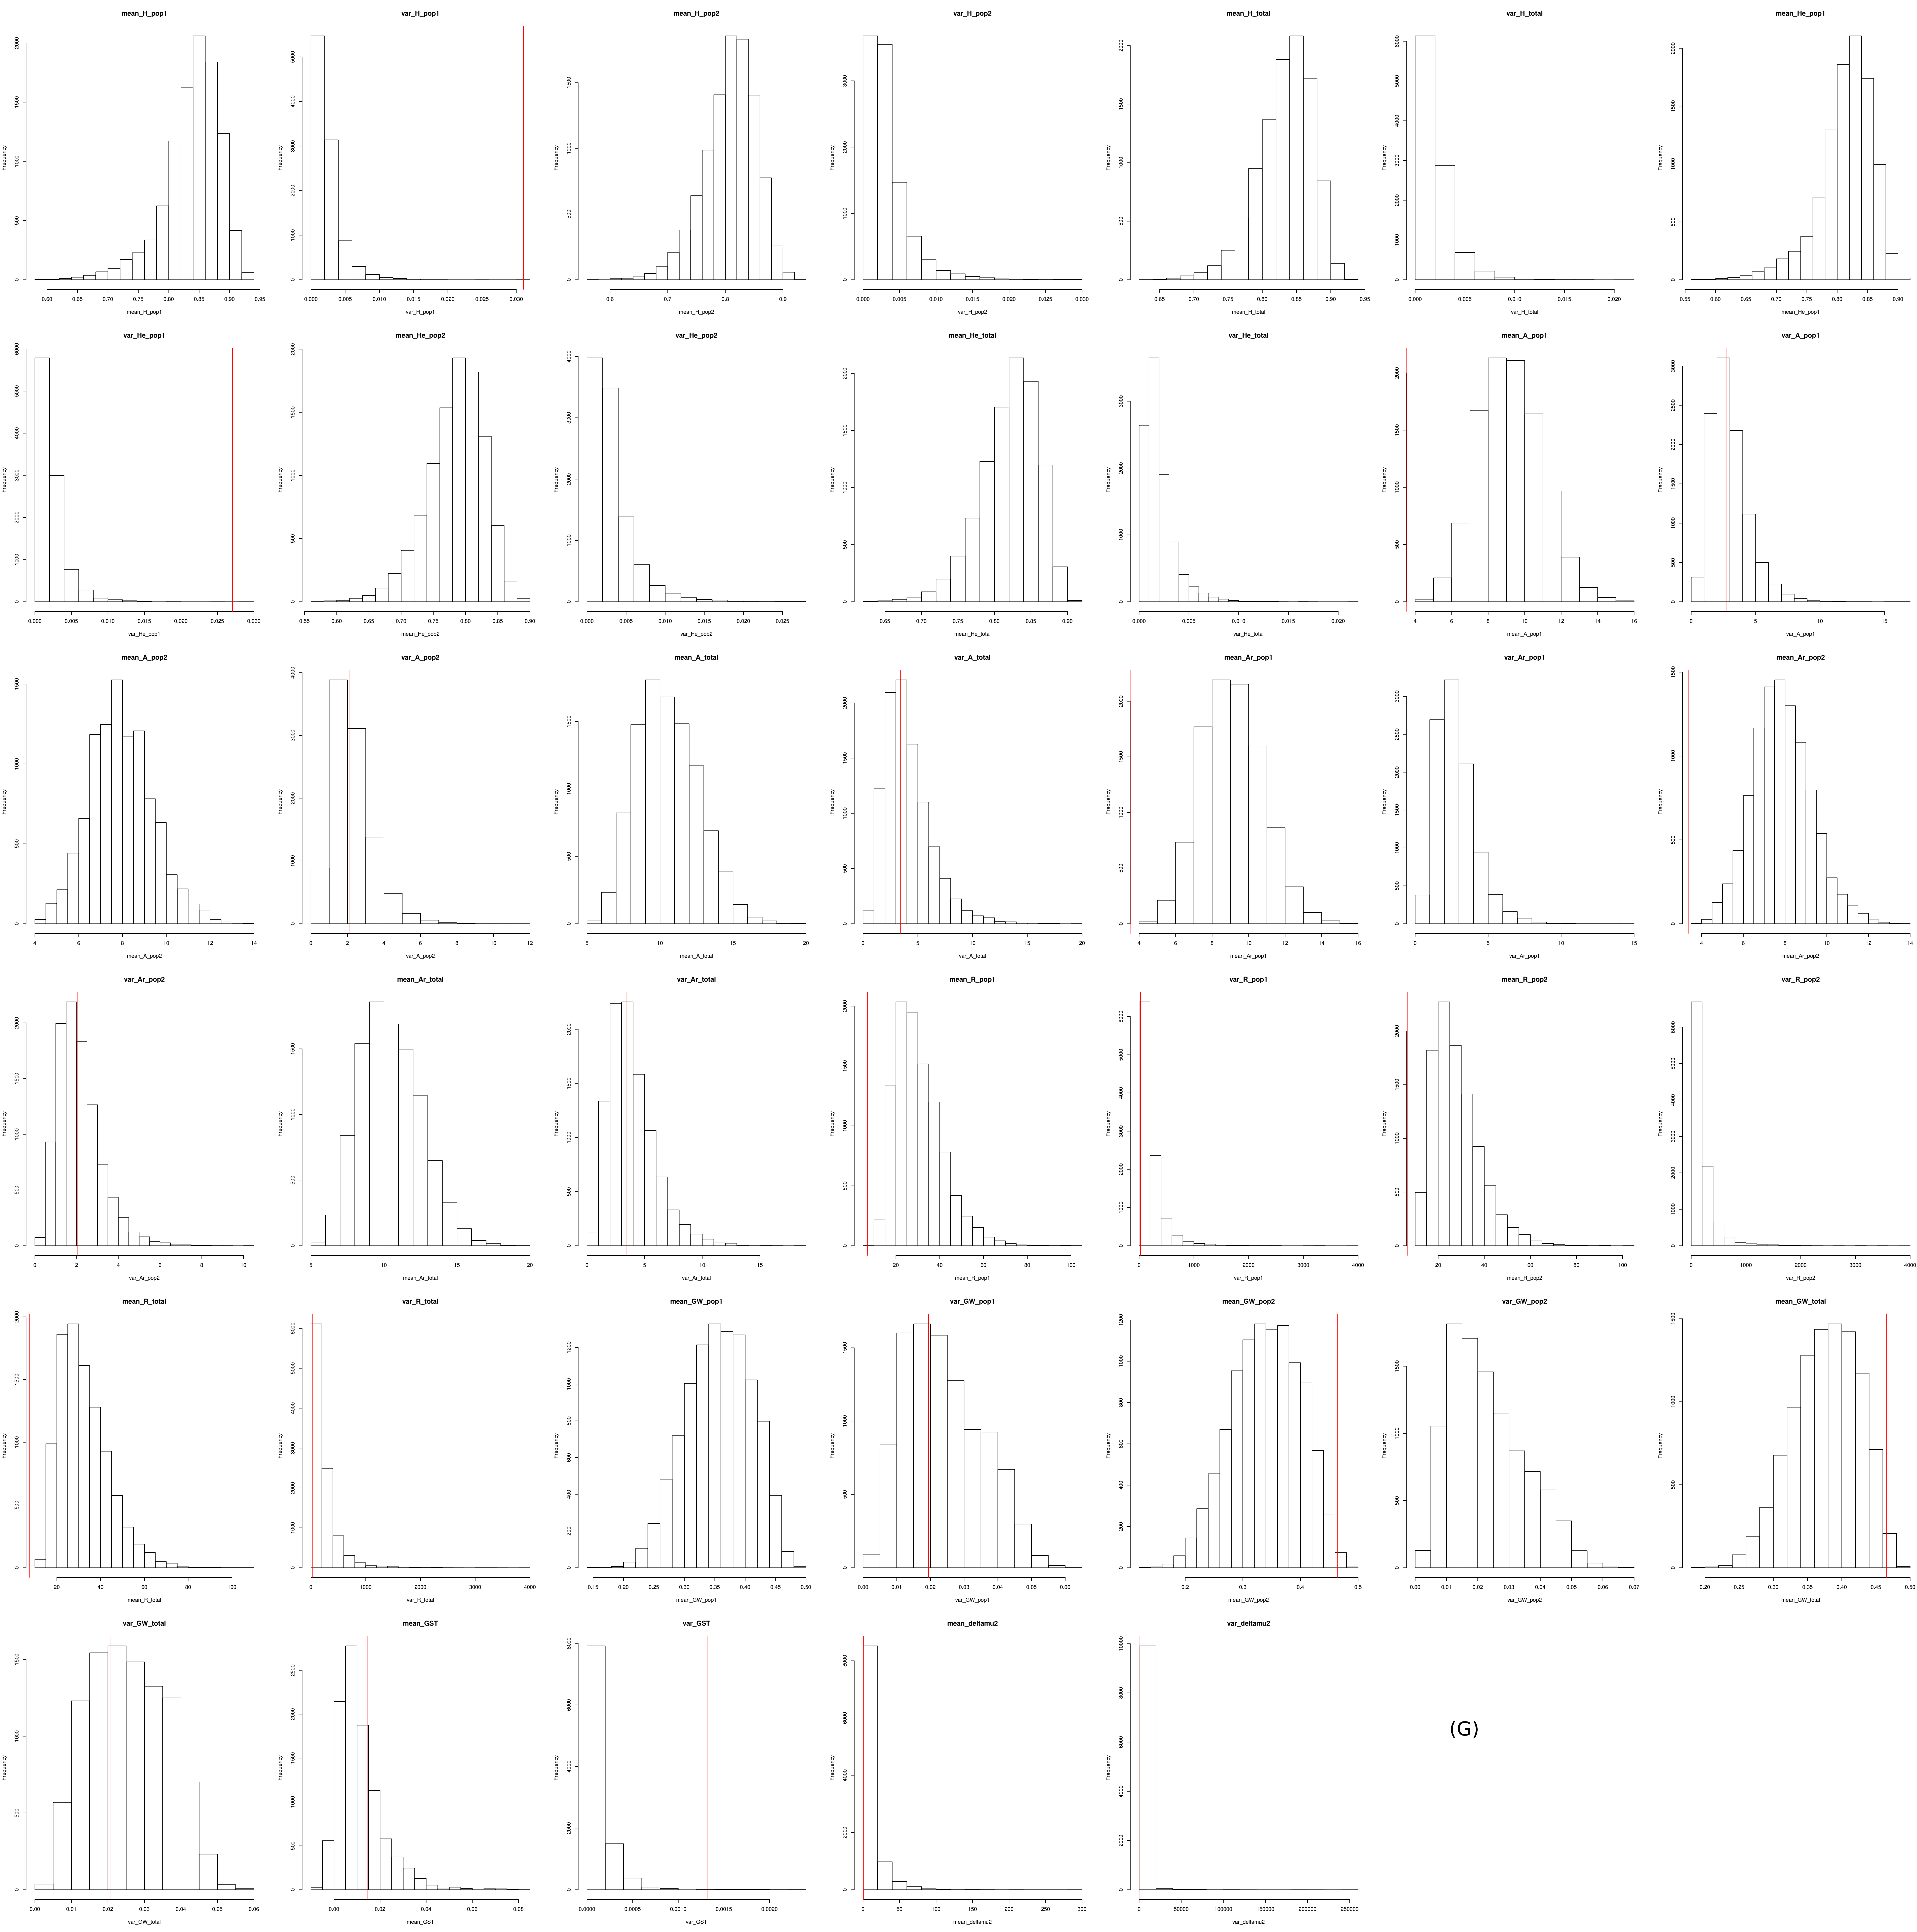

(G)



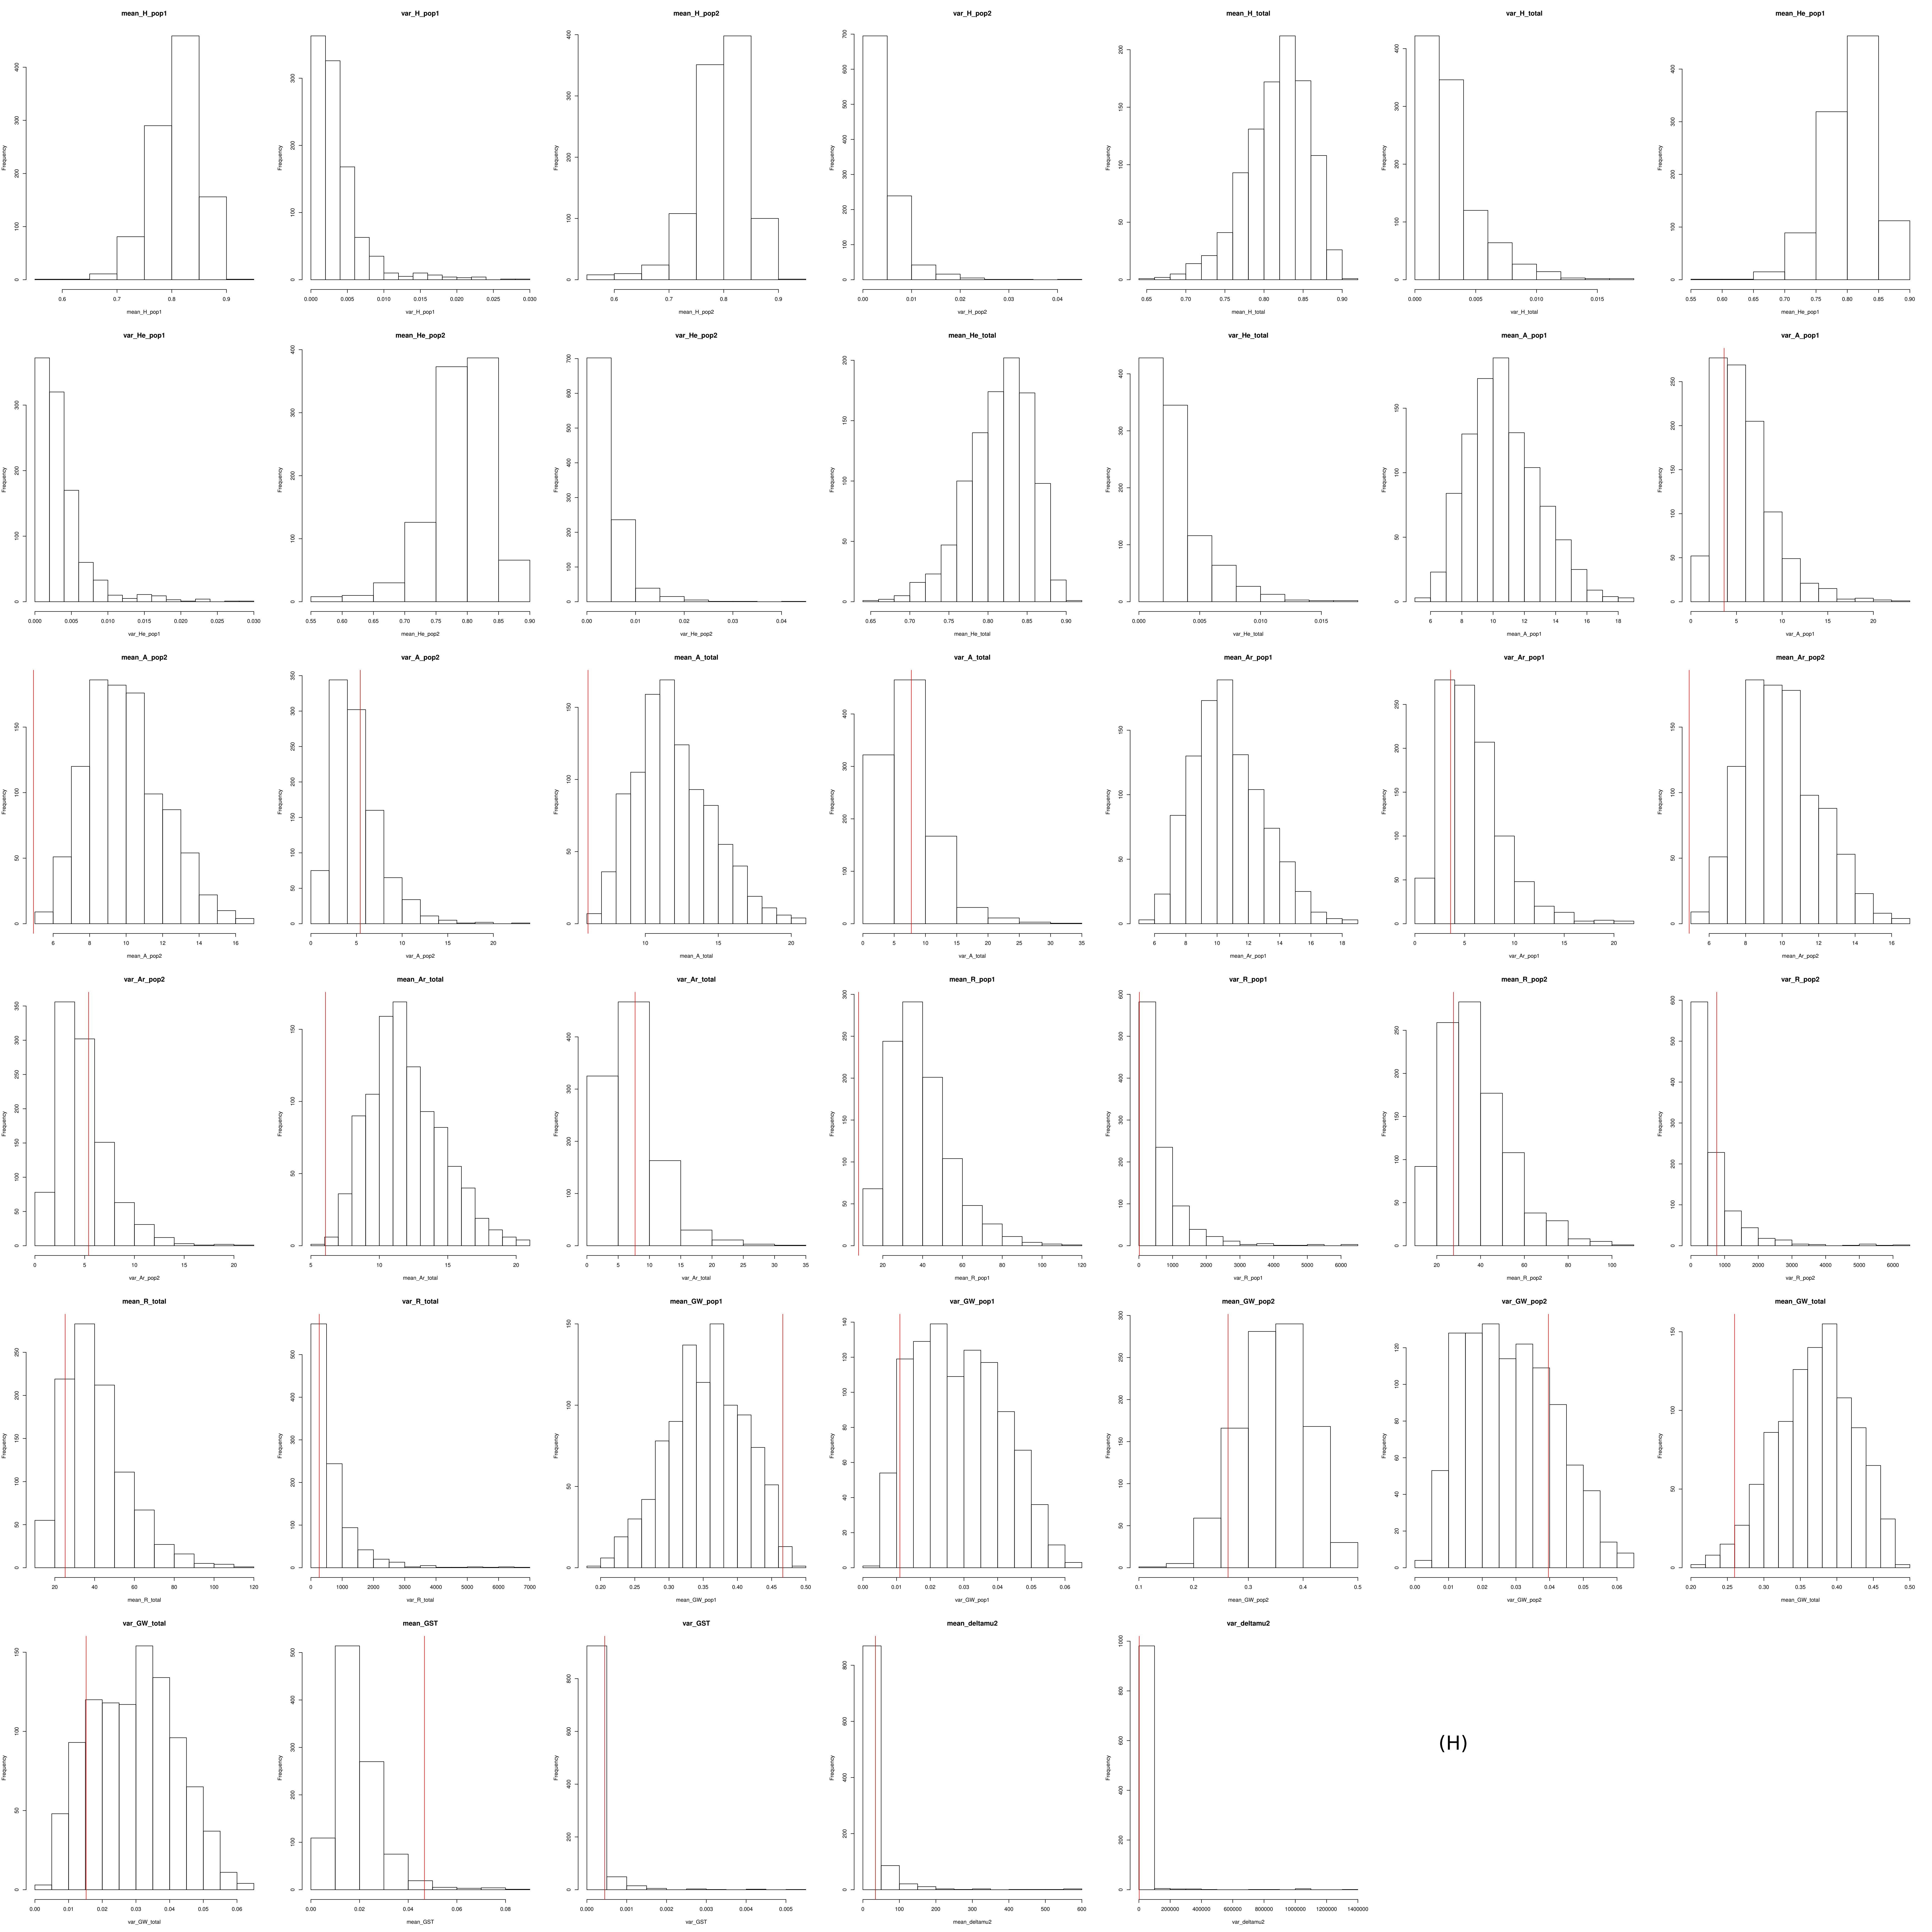

(H)

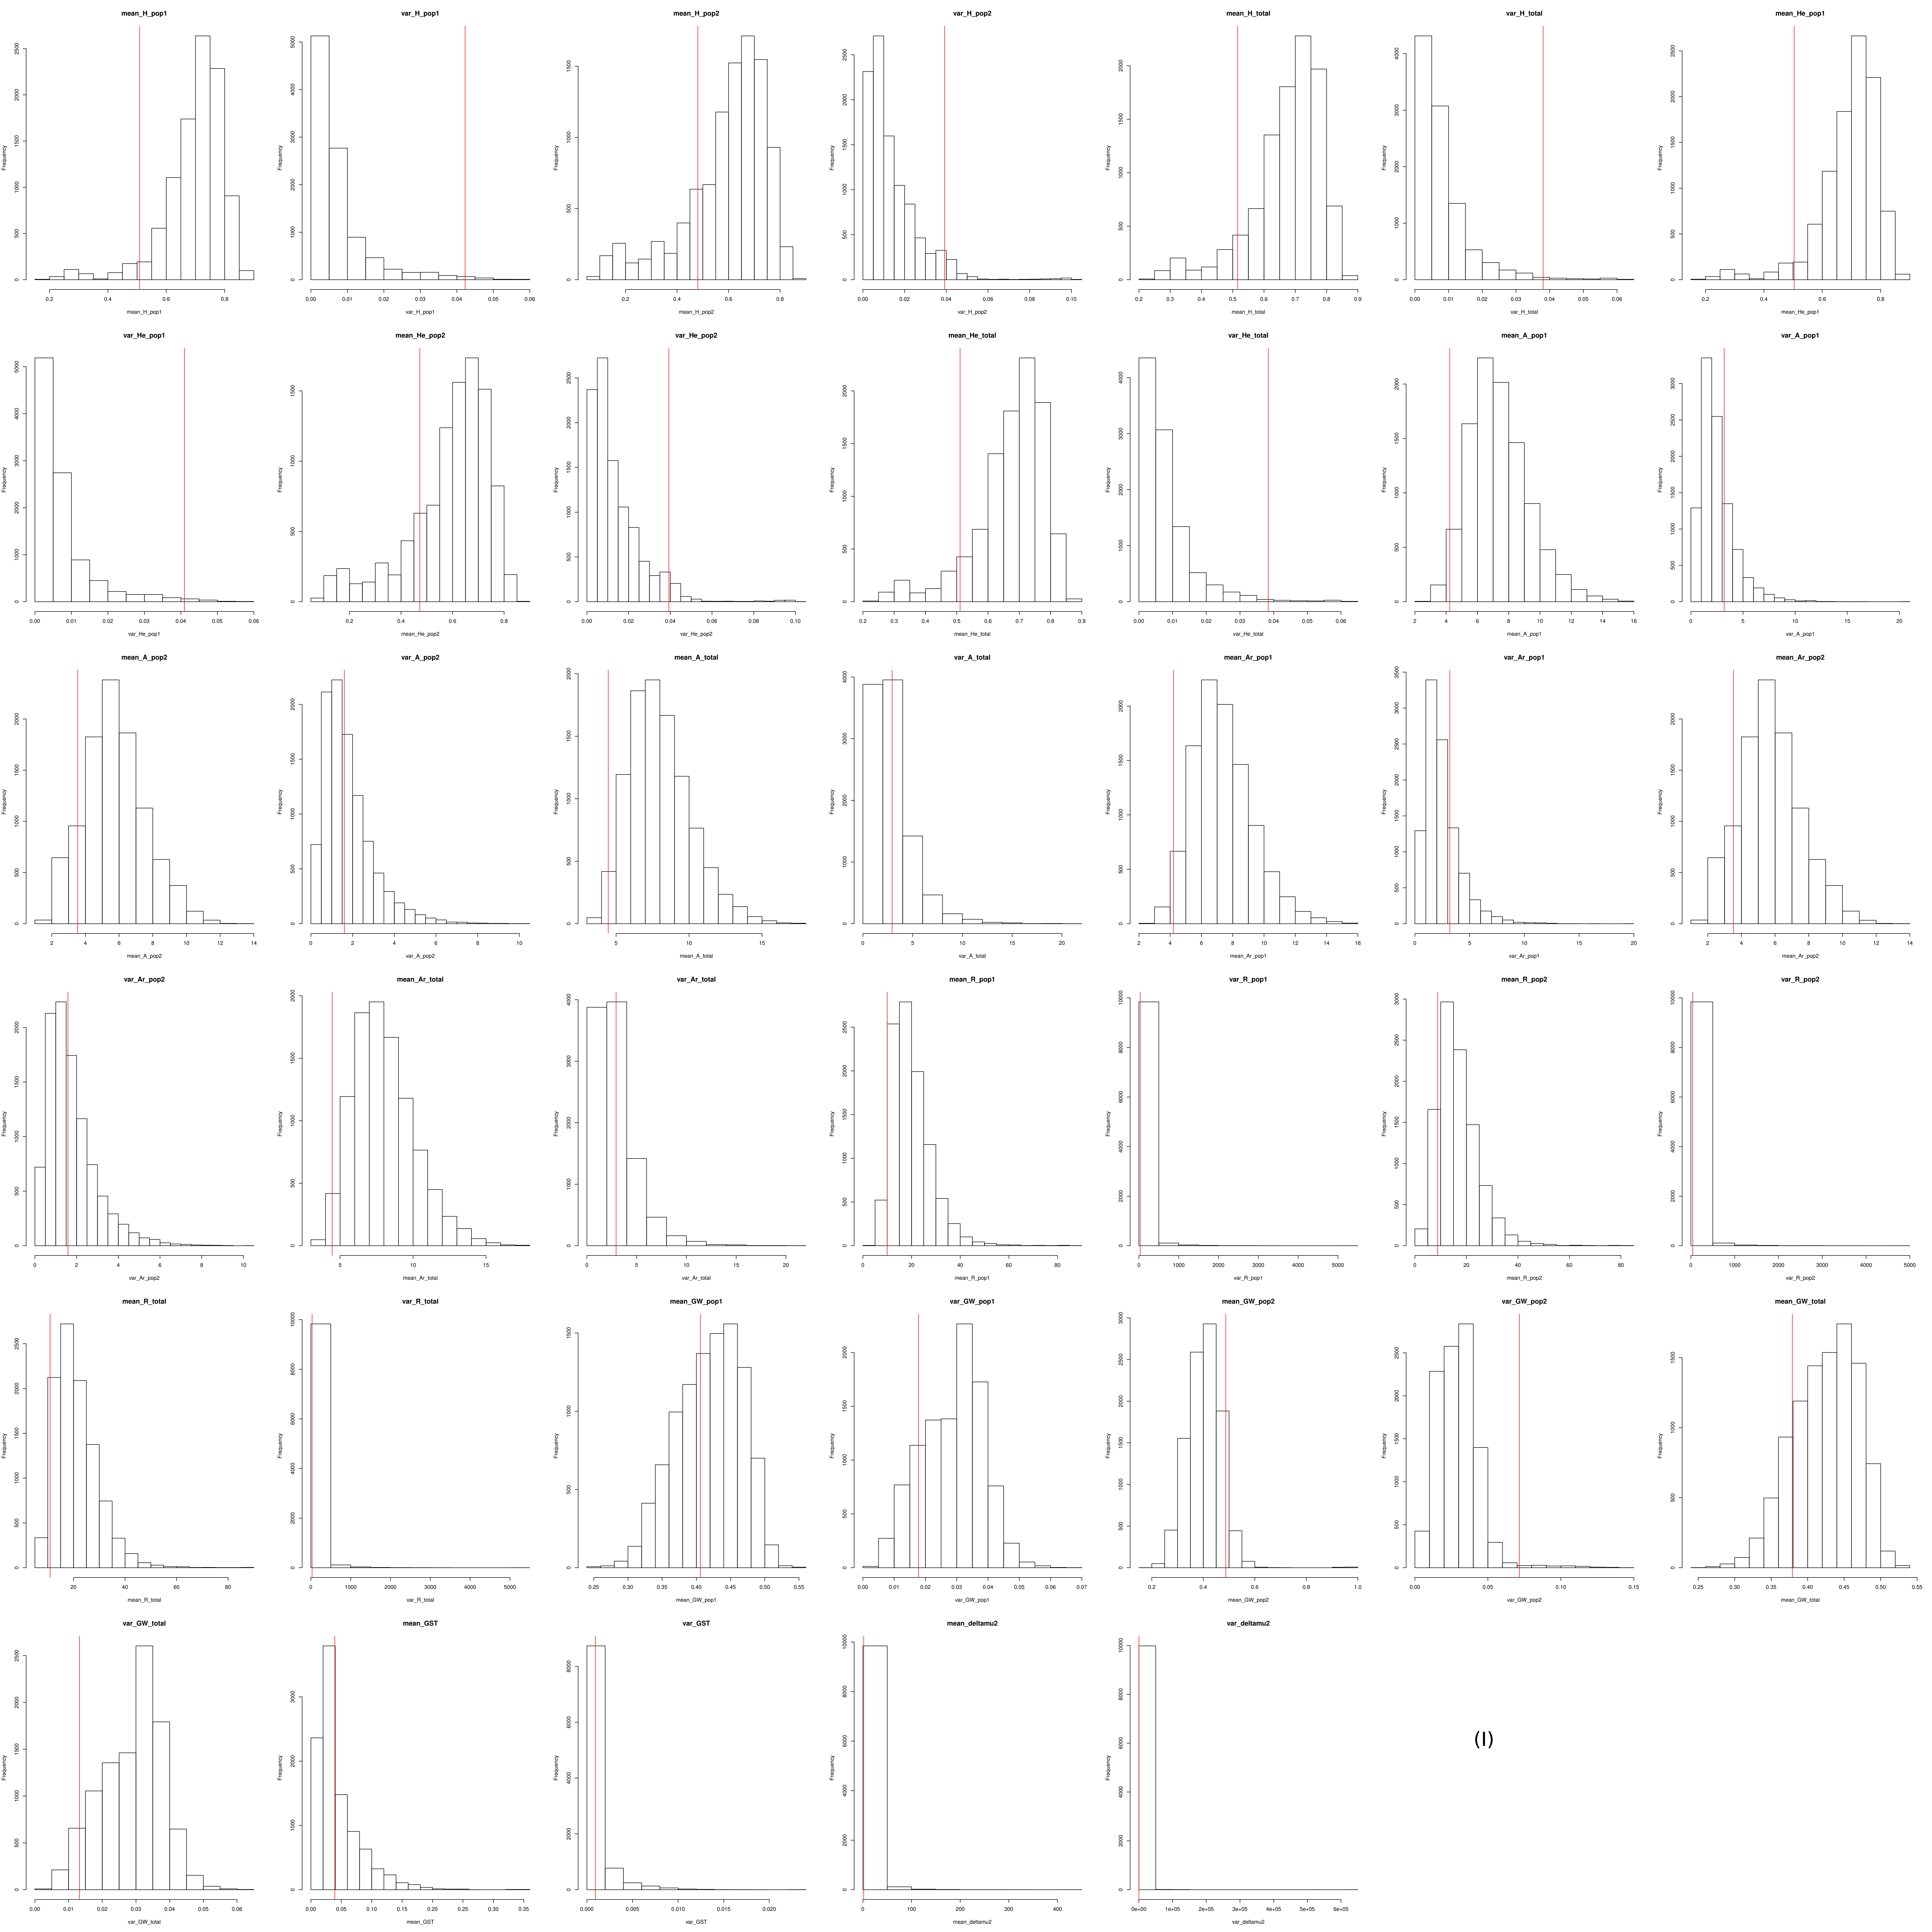

(1)

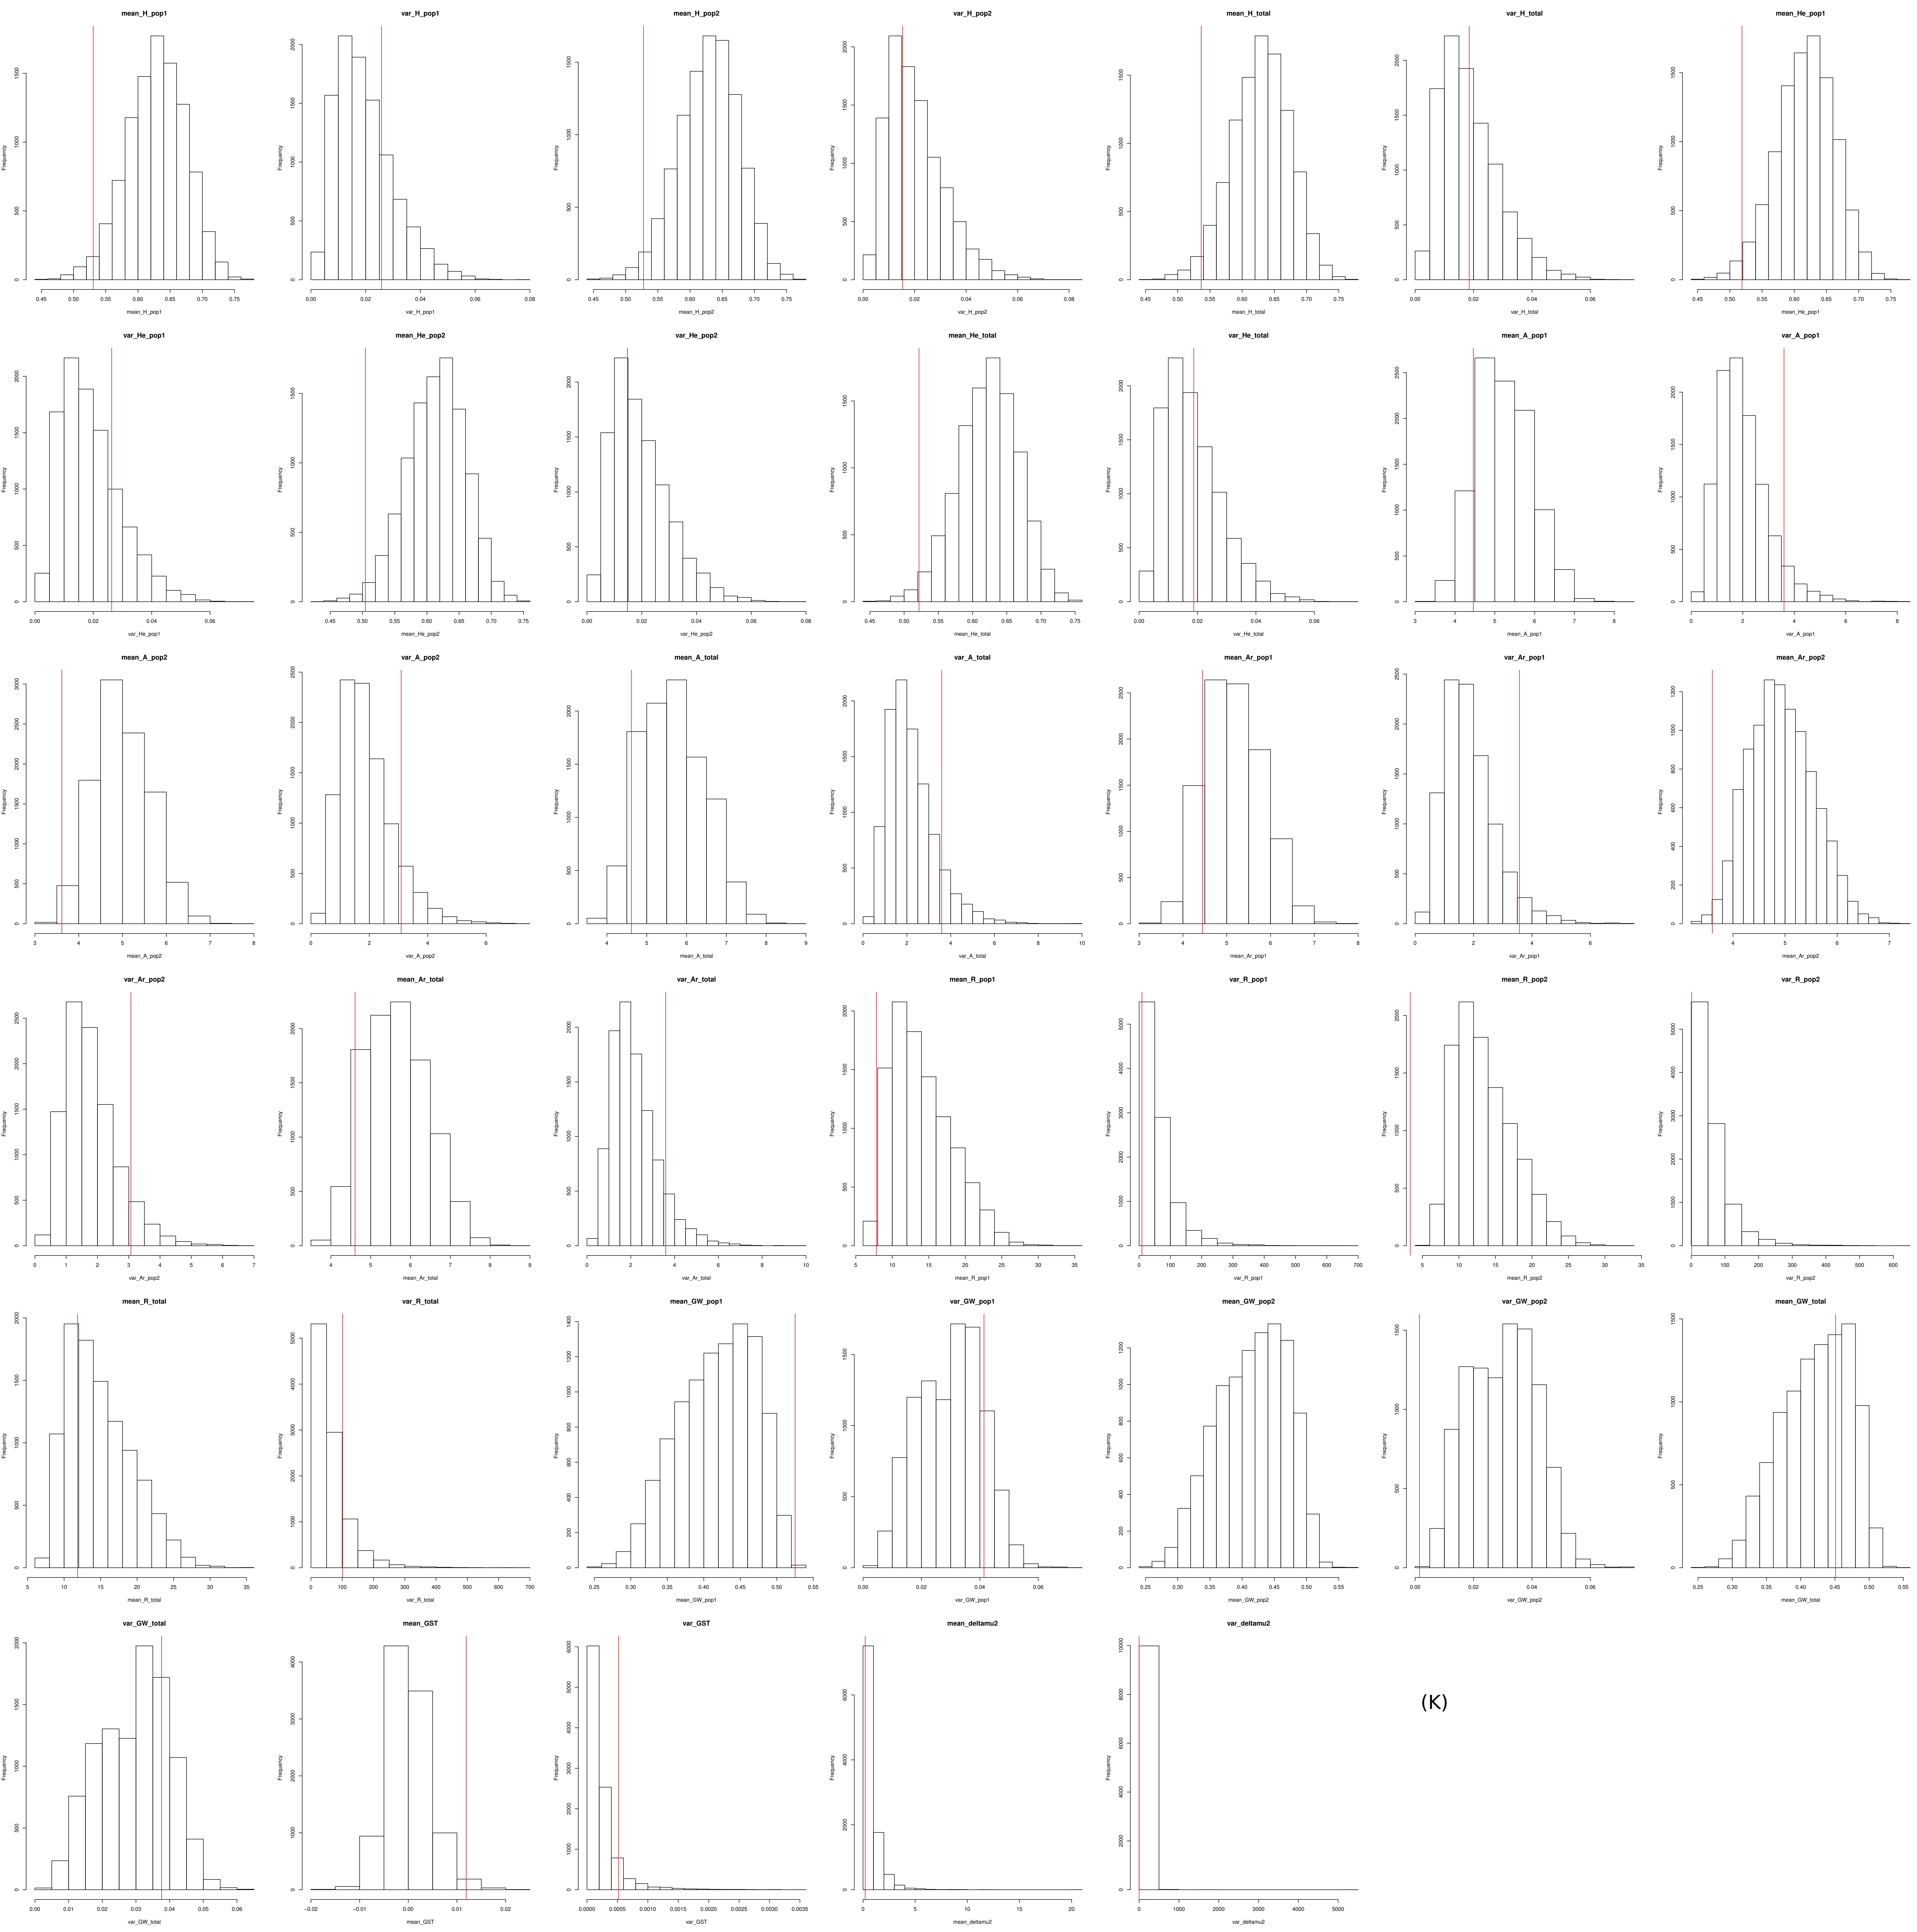

Supplement: peerj-04-1910-s002.pdf [file peerj-04-1910-s002.pdf]
